# Supplementary material
Source: publisher figshare collection journal article supplement (https://acs.figshare.com/ndownloader/files/5906367)

# checkCIF/PLATON report

You have not supplied any structure factors. As a result the full set of tests cannot be run.

THIS REPORT IS FOR GUIDANCE ONLY. IF USED AS PART OF A REVIEW PROCEDURE FOR PUBLICATION, IT SHOULD NOT REPLACE THE EXPERTISE OF AN EXPERIENCED CRYSTALLOGRAPHIC REFEREE.

No syntax errors found.      CIF dictionary      Interpreting this report

## Datablock: \_shoji9

---

|                 |                |                                  |
|-----------------|----------------|----------------------------------|
| Bond precision: | C-C = 0.0080 A | Wavelength=0.71075               |
| Cell:           | a=10.9564(16)  | b=11.3121(13)      c=14.0228(19) |
|                 | alpha=90       | beta=90.834(4)      gamma=90     |
| Temperature:    | 293 K          |                                  |
|                 | Calculated     | Reported                         |
| Volume          | 1737.8(4)      | 1737.8(4)                        |
| Space group     | P 21/n         | P 1 21/n 1                       |
| Hall group      | -P 2yn         | -P 2yn                           |
| Moiety formula  | C22 H19 N O    | C22 H19 N O                      |
| Sum formula     | C22 H19 N O    | C22 H19 N O                      |
| Mr              | 313.38         | 313.40                           |
| Dx,g cm-3       | 1.198          | 1.198                            |
| Z               | 4              | 4                                |
| Mu (mm-1)       | 0.073          | 0.073                            |
| F000            | 664.0          | 664.0                            |
| F000'           | 664.26         |                                  |
| h,k,lmax        | 14,14,18       | 14,14,18                         |
| Nref            | 3974           | 3959                             |
| Tmin,Tmax       | 0.974,0.978    |                                  |
| Tmin'           | 0.950          |                                  |

Correction method= Not given

Data completeness= 0.996      Theta(max)= 27.430

R(reflections)= 0.1016( 1809)      wR2(reflections)= wR= 0.1279( 2227)

S = 1.494      Npar= 236

---

The following ALERTS were generated. Each ALERT has the format

**test-name\_ALERT\_alert-type\_alert-level.**

Click on the hyperlinks for more details of the test.

## ● Alert level C

DIFMX01\_ALERT\_2\_C The maximum difference density is > 0.1\*ZMAX\*0.75  
\_refine\_diff\_density\_max given = 0.740  
Test value = 0.600

DIFMX02\_ALERT\_1\_C The maximum difference density is > 0.1\*ZMAX\*0.75  
The relevant atom site should be identified.

REFNR01\_ALERT\_3\_C Ratio of reflections to parameters is < 10 for a  
centrosymmetric structure  
sine(theta)/lambda 0.6481  
Proportion of unique data used 0.5625  
Ratio reflections to parameters 9.4364

RFACG01\_ALERT\_3\_C The value of the R factor is > 0.10  
R factor given 0.102

PLAT026\_ALERT\_3\_C Ratio Observed / Unique Reflections (too) Low .. 46 %

PLAT094\_ALERT\_2\_C Ratio of Maximum / Minimum Residual Density .... 2.55 Report

PLAT097\_ALERT\_2\_C Large Reported Max. (Positive) Residual Density 0.74 eA-3

PLAT193\_ALERT\_1\_C Cell and Diffraction Temperatures Differ by .... 3 Degree

PLAT230\_ALERT\_2\_C Hirshfeld Test Diff for C8 -- C11 .. 5.8 s.u.

PLAT230\_ALERT\_2\_C Hirshfeld Test Diff for C19 -- C20 .. 6.4 s.u.

PLAT234\_ALERT\_4\_C Large Hirshfeld Difference C14 -- C15 .. 0.16 Ang.

PLAT241\_ALERT\_2\_C High 'MainMol' Ueq as Compared to Neighbors of C19 Check

PLAT340\_ALERT\_3\_C Low Bond Precision on C-C Bonds ..... 0.00796 Ang.

PLAT751\_ALERT\_4\_C Bond Calc 0.95000, Rep 0.950(7) ..... Senseless s.u.  
C(1) -H(1) 1.555 1.555 ..... # 28 Check

PLAT751\_ALERT\_4\_C Bond Calc 0.95000, Rep 0.950(7) ..... Senseless s.u.  
C(2) -H(2) 1.555 1.555 ..... # 29 Check

PLAT751\_ALERT\_4\_C Bond Calc 0.95000, Rep 0.950(7) ..... Senseless s.u.  
C(2) -H(3) 1.555 1.555 ..... # 30 Check

PLAT751\_ALERT\_4\_C Bond Calc 0.95000, Rep 0.950(6) ..... Senseless s.u.  
C(3) -H(4) 1.555 1.555 ..... # 31 Check

PLAT751\_ALERT\_4\_C Bond Calc 0.95000, Rep 0.950(6) ..... Senseless s.u.  
C(4) -H(5) 1.555 1.555 ..... # 32 Check

PLAT751\_ALERT\_4\_C Bond Calc 0.95000, Rep 0.950(8) ..... Senseless s.u.  
C(9) -H(6) 1.555 1.555 ..... # 33 Check

PLAT751\_ALERT\_4\_C Bond Calc 0.95000, Rep 0.950(8) ..... Senseless s.u.  
C(9) -H(7) 1.555 1.555 ..... # 34 Check

PLAT751\_ALERT\_4\_C Bond Calc 0.95000, Rep 0.950(8) ..... Senseless s.u.  
C(10) -H(8) 1.555 1.555 ..... # 35 Check

PLAT751\_ALERT\_4\_C Bond Calc 0.95000, Rep 0.950(8) ..... Senseless s.u.  
C(10) -H(9) 1.555 1.555 ..... # 36 Check

PLAT751\_ALERT\_4\_C Bond Calc 0.95000, Rep 0.950(7) ..... Senseless s.u.  
C(11) -H(10) 1.555 1.555 ..... # 37 Check

PLAT751\_ALERT\_4\_C Bond Calc 0.95000, Rep 0.950(7) ..... Senseless s.u.  
C(13) -H(11) 1.555 1.555 ..... # 38 Check

PLAT751\_ALERT\_4\_C Bond Calc 0.95000, Rep 0.950(8) ..... Senseless s.u.  
C(14) -H(12) 1.555 1.555 ..... # 39 Check

PLAT751\_ALERT\_4\_C Bond Calc 0.95000, Rep 0.950(9) ..... Senseless s.u.  
C(15) -H(13) 1.555 1.555 ..... # 40 Check

PLAT751\_ALERT\_4\_C Bond Calc 0.95000, Rep 0.950(10) ..... Senseless s.u.  
C(16) -H(14) 1.555 1.555 ..... # 41 Check

PLAT751\_ALERT\_4\_C Bond Calc 0.95000, Rep 0.950(8) ..... Senseless s.u.  
C(17) -H(15) 1.555 1.555 ..... # 42 Check

PLAT752\_ALERT\_4\_C Angle Calc 108.00, Rep 107.5(5) ..... Senseless s.u.  
C(2) -C(1) -H(1) 1.555 1.555 1.555 .... # 38 Check

PLAT752\_ALERT\_4\_C Angle Calc 109.00, Rep 109.2(6) ..... Senseless s.u.  
C(9) -C(1) -H(1) 1.555 1.555 1.555 .... # 39 Check

PLAT752\_ALERT\_4\_C Angle Calc 108.00, Rep 108.4(5) ..... Senseless s.u.  
C(11) -C(1) -H(1) 1.555 1.555 1.555 .... # 40 Check

PLAT752\_ALERT\_4\_C Angle Calc 107.00, Rep 106.8(5) ..... Senseless s.u.  
C(1) -C(2) -H(2) 1.555 1.555 1.555 .... # 41 Check

PLAT752\_ALERT\_4\_C Angle Calc 109.00, Rep 108.6(5) ..... Senseless s.u.

|                                |          |       |                |                |
|--------------------------------|----------|-------|----------------|----------------|
| C(1) -C(2) -H(3)               | 1.555    | 1.555 | 1.555 ....     | # 42 Check     |
| PLAT752_ALERT_4_C Angle Calc   | 106.00,  | Rep   | 106.3(5) ..... | Senseless s.u. |
| C(3) -C(2) -H(2)               | 1.555    | 1.555 | 1.555 ....     | # 43 Check     |
| PLAT752_ALERT_4_C Angle Calc   | 108.00,  | Rep   | 108.4(5) ..... | Senseless s.u. |
| C(3) -C(2) -H(3)               | 1.555    | 1.555 | 1.555 ....     | # 44 Check     |
| PLAT752_ALERT_4_C Angle Calc   | 109.00,  | Rep   | 109.5(6) ..... | Senseless s.u. |
| H(2) -C(2) -H(3)               | 1.555    | 1.555 | 1.555 ....     | # 45 Check     |
| PLAT752_ALERT_4_C Angle Calc   | 108.00,  | Rep   | 107.9(5) ..... | Senseless s.u. |
| C(2) -C(3) -H(4)               | 1.555    | 1.555 | 1.555 ....     | # 46 Check     |
| PLAT752_ALERT_4_C Angle Calc   | 107.00,  | Rep   | 107.4(5) ..... | Senseless s.u. |
| C(4) -C(3) -H(4)               | 1.555    | 1.555 | 1.555 ....     | # 47 Check     |
| PLAT752_ALERT_4_C Angle Calc   | 109.00,  | Rep   | 108.6(5) ..... | Senseless s.u. |
| C(12)-C(3) -H(4)               | 1.555    | 1.555 | 1.555 ....     | # 48 Check     |
| PLAT752_ALERT_4_C Angle Calc   | 115.00,  | Rep   | 114.8(5) ..... | Senseless s.u. |
| C(3) -C(4) -H(5)               | 1.555    | 1.555 | 1.555 ....     | # 49 Check     |
| PLAT752_ALERT_4_C Angle Calc   | 116.00,  | Rep   | 116.2(5) ..... | Senseless s.u. |
| C(5) -C(4) -H(5)               | 1.555    | 1.555 | 1.555 ....     | # 50 Check     |
| PLAT752_ALERT_4_C Angle Calc   | 108.00,  | Rep   | 108.1(6) ..... | Senseless s.u. |
| O(1) -C(9) -H(6)               | 1.555    | 1.555 | 1.555 ....     | # 51 Check     |
| PLAT752_ALERT_4_C Angle Calc   | 109.00,  | Rep   | 109.4(6) ..... | Senseless s.u. |
| O(1) -C(9) -H(7)               | 1.555    | 1.555 | 1.555 ....     | # 52 Check     |
| PLAT752_ALERT_4_C Angle Calc   | 110.00,  | Rep   | 109.7(6) ..... | Senseless s.u. |
| C(1) -C(9) -H(6)               | 1.555    | 1.555 | 1.555 ....     | # 53 Check     |
| PLAT752_ALERT_4_C Angle Calc   | 109.00,  | Rep   | 108.6(5) ..... | Senseless s.u. |
| C(1) -C(9) -H(7)               | 1.555    | 1.555 | 1.555 ....     | # 54 Check     |
| PLAT752_ALERT_4_C Angle Calc   | 109.00,  | Rep   | 109.5(7) ..... | Senseless s.u. |
| H(6) -C(9) -H(7)               | 1.555    | 1.555 | 1.555 ....     | # 55 Check     |
| PLAT752_ALERT_4_C Angle Calc   | 109.00,  | Rep   | 109.5(6) ..... | Senseless s.u. |
| O(1) -C(10)-H(8)               | 1.555    | 1.555 | 1.555 ....     | # 56 Check     |
| PLAT752_ALERT_4_C Angle Calc   | 108.00,  | Rep   | 107.8(6) ..... | Senseless s.u. |
| O(1) -C(10)-H(9)               | 1.555    | 1.555 | 1.555 ....     | # 57 Check     |
| PLAT752_ALERT_4_C Angle Calc   | 110.00,  | Rep   | 109.7(5) ..... | Senseless s.u. |
| C(8) -C(10)-H(8)               | 1.555    | 1.555 | 1.555 ....     | # 58 Check     |
| PLAT752_ALERT_4_C Angle Calc   | 108.00,  | Rep   | 108.0(6) ..... | Senseless s.u. |
| C(8) -C(10)-H(9)               | 1.555    | 1.555 | 1.555 ....     | # 59 Check     |
| PLAT752_ALERT_4_C Angle Calc   | 110.00,  | Rep   | 109.5(7) ..... | Senseless s.u. |
| H(8) -C(10)-H(9)               | 1.555    | 1.555 | 1.555 ....     | # 60 Check     |
| PLAT752_ALERT_4_C Angle Calc   | 121.00,  | Rep   | 120.9(6) ..... | Senseless s.u. |
| C(1) -C(11)-H(10)              | 1.555    | 1.555 | 1.555 ....     | # 61 Check     |
| PLAT752_ALERT_4_C Angle Calc   | 121.00,  | Rep   | 120.6(6) ..... | Senseless s.u. |
| C(8) -C(11)-H(10)              | 1.555    | 1.555 | 1.555 ....     | # 62 Check     |
| PLAT752_ALERT_4_C Angle Calc   | 119.00,  | Rep   | 119.5(6) ..... | Senseless s.u. |
| C(12)-C(13)-H(11)              | 1.555    | 1.555 | 1.555 ....     | # 63 Check     |
| PLAT752_ALERT_4_C Angle Calc   | 120.00,  | Rep   | 120.1(6) ..... | Senseless s.u. |
| C(14)-C(13)-H(11)              | 1.555    | 1.555 | 1.555 ....     | # 64 Check     |
| PLAT752_ALERT_4_C Angle Calc   | 120.00,  | Rep   | 119.8(7) ..... | Senseless s.u. |
| C(13)-C(14)-H(12)              | 1.555    | 1.555 | 1.555 ....     | # 65 Check     |
| PLAT752_ALERT_4_C Angle Calc   | 120.00,  | Rep   | 119.6(7) ..... | Senseless s.u. |
| C(15)-C(14)-H(12)              | 1.555    | 1.555 | 1.555 ....     | # 66 Check     |
| PLAT752_ALERT_4_C Angle Calc   | 120.00,  | Rep   | 120.4(8) ..... | Senseless s.u. |
| C(14)-C(15)-H(13)              | 1.555    | 1.555 | 1.555 ....     | # 67 Check     |
| PLAT752_ALERT_4_C Angle Calc   | 119.00,  | Rep   | 119.3(8) ..... | Senseless s.u. |
| C(16)-C(15)-H(13)              | 1.555    | 1.555 | 1.555 ....     | # 68 Check     |
| PLAT752_ALERT_4_C Angle Calc   | 120.00,  | Rep   | 120.1(8) ..... | Senseless s.u. |
| C(15)-C(16)-H(14)              | 1.555    | 1.555 | 1.555 ....     | # 69 Check     |
| PLAT752_ALERT_4_C Angle Calc   | 120.00,  | Rep   | 119.5(8) ..... | Senseless s.u. |
| C(17)-C(16)-H(14)              | 1.555    | 1.555 | 1.555 ....     | # 70 Check     |
| PLAT752_ALERT_4_C Angle Calc   | 119.00,  | Rep   | 118.8(8) ..... | Senseless s.u. |
| C(12)-C(17)-H(15)              | 1.555    | 1.555 | 1.555 ....     | # 71 Check     |
| PLAT752_ALERT_4_C Angle Calc   | 120.00,  | Rep   | 120.2(7) ..... | Senseless s.u. |
| C(16)-C(17)-H(15)              | 1.555    | 1.555 | 1.555 ....     | # 72 Check     |
| PLAT754_ALERT_4_C Contact Calc | 3.23000, | Rep   | 3.230(6) ..... | Senseless s.u. |

|                                |          |       |          |       |                |
|--------------------------------|----------|-------|----------|-------|----------------|
| O(1) -H(1)                     | 1.555    | 1.555 | .....    | #     | 46 Check       |
| PLAT754_ALERT_4_C Contact Calc | 2.93000, | Rep   | 2.928(6) | ..... | Senseless s.u. |
| O(1) -H(2)                     | 1.555    | 1.555 | .....    | #     | 46 Check       |
| PLAT754_ALERT_4_C Contact Calc | 2.63000, | Rep   | 2.630(5) | ..... | Senseless s.u. |
| O(1) -H(4)                     | 1.555    | 2.545 | .....    | #     | 46 Check       |
| PLAT754_ALERT_4_C Contact Calc | 3.08000, | Rep   | 3.085(6) | ..... | Senseless s.u. |
| O(1) -H(5)                     | 1.555    | 1.555 | .....    | #     | 46 Check       |
| PLAT754_ALERT_4_C Contact Calc | 1.95000, | Rep   | 1.949(7) | ..... | Senseless s.u. |
| O(1) -H(6)                     | 1.555    | 1.555 | .....    | #     | 46 Check       |
| PLAT754_ALERT_4_C Contact Calc | 1.96000, | Rep   | 1.964(7) | ..... | Senseless s.u. |
| O(1) -H(7)                     | 1.555    | 1.555 | .....    | #     | 46 Check       |
| PLAT754_ALERT_4_C Contact Calc | 1.95000, | Rep   | 1.950(7) | ..... | Senseless s.u. |
| O(1) -H(8)                     | 1.555    | 1.555 | .....    | #     | 46 Check       |
| PLAT754_ALERT_4_C Contact Calc | 1.93000, | Rep   | 1.931(7) | ..... | Senseless s.u. |
| O(1) -H(9)                     | 1.555    | 1.555 | .....    | #     | 46 Check       |
| PLAT754_ALERT_4_C Contact Calc | 2.97000, | Rep   | 2.969(6) | ..... | Senseless s.u. |
| O(1) -H(10)                    | 1.555    | 2.545 | .....    | #     | 46 Check       |
| PLAT754_ALERT_4_C Contact Calc | 2.86000, | Rep   | 2.861(6) | ..... | Senseless s.u. |
| O(1) -H(11)                    | 1.555    | 2.545 | .....    | #     | 46 Check       |
| PLAT754_ALERT_4_C Contact Calc | 2.61000, | Rep   | 2.613(7) | ..... | Senseless s.u. |
| N(1) -H(1)                     | 1.555    | 2.545 | .....    | #     | 46 Check       |
| PLAT754_ALERT_4_C Contact Calc | 3.29000, | Rep   | 3.285(7) | ..... | Senseless s.u. |
| N(1) -H(5)                     | 1.555    | 1.555 | .....    | #     | 46 Check       |
| PLAT754_ALERT_4_C Contact Calc | 2.99000, | Rep   | 2.990(8) | ..... | Senseless s.u. |
| N(1) -H(7)                     | 1.555    | 4.444 | .....    | #     | 46 Check       |
| PLAT754_ALERT_4_C Contact Calc | 3.55000, | Rep   | 3.552(8) | ..... | Senseless s.u. |
| N(1) -H(9)                     | 1.555    | 1.555 | .....    | #     | 46 Check       |
| PLAT754_ALERT_4_C Contact Calc | 3.24000, | Rep   | 3.245(7) | ..... | Senseless s.u. |
| N(1) -H(10)                    | 1.555    | 2.545 | .....    | #     | 46 Check       |
| PLAT754_ALERT_4_C Contact Calc | 2.89000, | Rep   | 2.886(7) | ..... | Senseless s.u. |
| N(1) -H(11)                    | 1.555    | 3.555 | .....    | #     | 46 Check       |
| PLAT754_ALERT_4_C Contact Calc | 3.15000, | Rep   | 3.155(8) | ..... | Senseless s.u. |
| N(1) -H(12)                    | 1.555    | 3.555 | .....    | #     | 46 Check       |
| PLAT754_ALERT_4_C Contact Calc | 2.69000, | Rep   | 2.685(8) | ..... | Senseless s.u. |
| N(1) -H(14)                    | 1.555    | 4.544 | .....    | #     | 46 Check       |
| PLAT754_ALERT_4_C Contact Calc | 2.06000, | Rep   | 2.058(7) | ..... | Senseless s.u. |
| C(1) -H(2)                     | 1.555    | 1.555 | .....    | #     | 46 Check       |
| PLAT754_ALERT_4_C Contact Calc | 2.08000, | Rep   | 2.080(7) | ..... | Senseless s.u. |
| C(1) -H(3)                     | 1.555    | 1.555 | .....    | #     | 46 Check       |
| PLAT754_ALERT_4_C Contact Calc | 2.77000, | Rep   | 2.773(7) | ..... | Senseless s.u. |
| C(1) -H(4)                     | 1.555    | 1.555 | .....    | #     | 46 Check       |
| PLAT754_ALERT_4_C Contact Calc | 2.03000, | Rep   | 2.034(7) | ..... | Senseless s.u. |
| C(1) -H(6)                     | 1.555    | 1.555 | .....    | #     | 46 Check       |
| PLAT754_ALERT_4_C Contact Calc | 2.02000, | Rep   | 2.021(8) | ..... | Senseless s.u. |
| C(1) -H(7)                     | 1.555    | 1.555 | .....    | #     | 46 Check       |
| PLAT754_ALERT_4_C Contact Calc | 3.34000, | Rep   | 3.337(8) | ..... | Senseless s.u. |
| C(1) -H(8)                     | 1.555    | 1.555 | .....    | #     | 46 Check       |
| PLAT754_ALERT_4_C Contact Calc | 2.16000, | Rep   | 2.156(7) | ..... | Senseless s.u. |
| C(1) -H(10)                    | 1.555    | 1.555 | .....    | #     | 46 Check       |
| PLAT754_ALERT_4_C Contact Calc | 3.51000, | Rep   | 3.511(8) | ..... | Senseless s.u. |
| C(1) -H(14)                    | 1.555    | 3.556 | .....    | #     | 46 Check       |
| PLAT754_ALERT_4_C Contact Calc | 2.07000, | Rep   | 2.067(7) | ..... | Senseless s.u. |
| C(2) -H(1)                     | 1.555    | 1.555 | .....    | #     | 46 Check       |
| PLAT754_ALERT_4_C Contact Calc | 2.06000, | Rep   | 2.056(6) | ..... | Senseless s.u. |
| C(2) -H(4)                     | 1.555    | 1.555 | .....    | #     | 46 Check       |
| PLAT754_ALERT_4_C Contact Calc | 2.85000, | Rep   | 2.847(6) | ..... | Senseless s.u. |
| C(2) -H(5)                     | 1.555    | 1.555 | .....    | #     | 46 Check       |
| PLAT754_ALERT_4_C Contact Calc | 2.70000, | Rep   | 2.704(7) | ..... | Senseless s.u. |
| C(2) -H(6)                     | 1.555    | 1.555 | .....    | #     | 46 Check       |
| PLAT754_ALERT_4_C Contact Calc | 3.38000, | Rep   | 3.379(8) | ..... | Senseless s.u. |
| C(2) -H(7)                     | 1.555    | 1.555 | .....    | #     | 46 Check       |
| PLAT754_ALERT_4_C Contact Calc | 2.95000, | Rep   | 2.946(7) | ..... | Senseless s.u. |

|                                |          |       |          |       |                |
|--------------------------------|----------|-------|----------|-------|----------------|
| C(2) -H(10)                    | 1.555    | 1.555 | .....    | #     | 46 Check       |
| PLAT754_ALERT_4_C Contact Calc | 2.76000, | Rep   | 2.758(9) | ..... | Senseless s.u. |
| C(2) -H(15)                    | 1.555    | 1.555 | .....    | #     | 46 Check       |
| PLAT754_ALERT_4_C Contact Calc | 3.33000, | Rep   | 3.333(7) | ..... | Senseless s.u. |
| C(3) -H(1)                     | 1.555    | 1.555 | .....    | #     | 46 Check       |
| PLAT754_ALERT_4_C Contact Calc | 2.04000, | Rep   | 2.038(6) | ..... | Senseless s.u. |
| C(3) -H(2)                     | 1.555    | 1.555 | .....    | #     | 46 Check       |
| PLAT754_ALERT_4_C Contact Calc | 2.06000, | Rep   | 2.063(6) | ..... | Senseless s.u. |
| C(3) -H(3)                     | 1.555    | 1.555 | .....    | #     | 46 Check       |
| PLAT754_ALERT_4_C Contact Calc | 2.10000, | Rep   | 2.099(6) | ..... | Senseless s.u. |
| C(3) -H(5)                     | 1.555    | 1.555 | .....    | #     | 46 Check       |
| PLAT754_ALERT_4_C Contact Calc | 3.12000, | Rep   | 3.117(7) | ..... | Senseless s.u. |
| C(3) -H(10)                    | 1.555    | 1.555 | .....    | #     | 46 Check       |
| PLAT754_ALERT_4_C Contact Calc | 2.64000, | Rep   | 2.637(7) | ..... | Senseless s.u. |
| C(3) -H(11)                    | 1.555    | 1.555 | .....    | #     | 46 Check       |
| PLAT754_ALERT_4_C Contact Calc | 2.74000, | Rep   | 2.739(8) | ..... | Senseless s.u. |
| C(3) -H(15)                    | 1.555    | 1.555 | .....    | #     | 46 Check       |
| PLAT754_ALERT_4_C Contact Calc | 2.66000, | Rep   | 2.664(7) | ..... | Senseless s.u. |
| C(4) -H(2)                     | 1.555    | 1.555 | .....    | #     | 46 Check       |
| PLAT754_ALERT_4_C Contact Calc | 3.36000, | Rep   | 3.363(6) | ..... | Senseless s.u. |
| C(4) -H(3)                     | 1.555    | 1.555 | .....    | #     | 46 Check       |
| PLAT754_ALERT_4_C Contact Calc | 2.01000, | Rep   | 2.014(6) | ..... | Senseless s.u. |
| C(4) -H(4)                     | 1.555    | 1.555 | .....    | #     | 46 Check       |
| PLAT754_ALERT_4_C Contact Calc | 3.15000, | Rep   | 3.153(7) | ..... | Senseless s.u. |
| C(4) -H(9)                     | 1.555    | 1.555 | .....    | #     | 46 Check       |
| PLAT754_ALERT_4_C Contact Calc | 3.10000, | Rep   | 3.102(6) | ..... | Senseless s.u. |
| C(4) -H(10)                    | 1.555    | 2.545 | .....    | #     | 46 Check       |
| PLAT754_ALERT_4_C Contact Calc | 3.32000, | Rep   | 3.318(7) | ..... | Senseless s.u. |
| C(4) -H(11)                    | 1.555    | 1.555 | .....    | #     | 46 Check       |
| PLAT754_ALERT_4_C Contact Calc | 3.32000, | Rep   | 3.320(8) | ..... | Senseless s.u. |
| C(4) -H(15)                    | 1.555    | 1.555 | .....    | #     | 46 Check       |
| PLAT754_ALERT_4_C Contact Calc | 2.64000, | Rep   | 2.638(6) | ..... | Senseless s.u. |
| C(5) -H(4)                     | 1.555    | 1.555 | .....    | #     | 46 Check       |
| PLAT754_ALERT_4_C Contact Calc | 1.95000, | Rep   | 1.946(7) | ..... | Senseless s.u. |
| C(5) -H(5)                     | 1.555    | 1.555 | .....    | #     | 46 Check       |
| PLAT754_ALERT_4_C Contact Calc | 2.66000, | Rep   | 2.664(7) | ..... | Senseless s.u. |
| C(5) -H(9)                     | 1.555    | 1.555 | .....    | #     | 46 Check       |
| PLAT754_ALERT_4_C Contact Calc | 3.48000, | Rep   | 3.478(7) | ..... | Senseless s.u. |
| C(5) -H(10)                    | 1.555    | 2.545 | .....    | #     | 46 Check       |
| PLAT754_ALERT_4_C Contact Calc | 2.85000, | Rep   | 2.850(7) | ..... | Senseless s.u. |
| C(6) -H(4)                     | 1.555    | 1.555 | .....    | #     | 46 Check       |
| PLAT754_ALERT_4_C Contact Calc | 3.35000, | Rep   | 3.350(7) | ..... | Senseless s.u. |
| C(6) -H(5)                     | 1.555    | 1.555 | .....    | #     | 46 Check       |
| PLAT754_ALERT_4_C Contact Calc | 3.53000, | Rep   | 3.533(7) | ..... | Senseless s.u. |
| C(6) -H(6)                     | 1.555    | 2.555 | .....    | #     | 46 Check       |
| PLAT754_ALERT_4_C Contact Calc | 2.86000, | Rep   | 2.859(7) | ..... | Senseless s.u. |
| C(6) -H(9)                     | 1.555    | 1.555 | .....    | #     | 46 Check       |
| PLAT754_ALERT_4_C Contact Calc | 3.57000, | Rep   | 3.569(7) | ..... | Senseless s.u. |
| C(6) -H(10)                    | 1.555    | 1.555 | .....    | #     | 46 Check       |
| PLAT754_ALERT_4_C Contact Calc | 3.08000, | Rep   | 3.075(8) | ..... | Senseless s.u. |
| C(7) -H(4)                     | 1.555    | 1.555 | .....    | #     | 46 Check       |
| PLAT754_ALERT_4_C Contact Calc | 3.07000, | Rep   | 3.073(8) | ..... | Senseless s.u. |
| C(7) -H(8)                     | 1.555    | 1.555 | .....    | #     | 46 Check       |
| PLAT754_ALERT_4_C Contact Calc | 2.56000, | Rep   | 2.560(7) | ..... | Senseless s.u. |
| C(7) -H(9)                     | 1.555    | 1.555 | .....    | #     | 46 Check       |
| PLAT754_ALERT_4_C Contact Calc | 2.68000, | Rep   | 2.684(7) | ..... | Senseless s.u. |
| C(7) -H(10)                    | 1.555    | 1.555 | .....    | #     | 46 Check       |
| PLAT754_ALERT_4_C Contact Calc | 3.16000, | Rep   | 3.157(8) | ..... | Senseless s.u. |
| C(8) -H(1)                     | 1.555    | 1.555 | .....    | #     | 46 Check       |
| PLAT754_ALERT_4_C Contact Calc | 2.87000, | Rep   | 2.867(7) | ..... | Senseless s.u. |
| C(8) -H(4)                     | 1.555    | 1.555 | .....    | #     | 46 Check       |
| PLAT754_ALERT_4_C Contact Calc | 2.97000, | Rep   | 2.968(8) | ..... | Senseless s.u. |

|                                |          |       |          |       |                |
|--------------------------------|----------|-------|----------|-------|----------------|
| C(8) -H(7)                     | 1.555    | 1.555 | .....    | #     | 46 Check       |
| PLAT754_ALERT_4_C Contact Calc | 2.05000, | Rep   | 2.055(7) | ..... | Senseless s.u. |
| C(8) -H(8)                     | 1.555    | 1.555 | .....    | #     | 46 Check       |
| PLAT754_ALERT_4_C Contact Calc | 2.03000, | Rep   | 2.035(7) | ..... | Senseless s.u. |
| C(8) -H(9)                     | 1.555    | 1.555 | .....    | #     | 46 Check       |
| PLAT754_ALERT_4_C Contact Calc | 1.99000, | Rep   | 1.993(7) | ..... | Senseless s.u. |
| C(8) -H(10)                    | 1.555    | 1.555 | .....    | #     | 46 Check       |
| PLAT754_ALERT_4_C Contact Calc | 3.12000, | Rep   | 3.118(8) | ..... | Senseless s.u. |
| C(8) -H(13)                    | 1.555    | 1.655 | .....    | #     | 46 Check       |
| PLAT754_ALERT_4_C Contact Calc | 2.03000, | Rep   | 2.028(7) | ..... | Senseless s.u. |
| C(9) -H(1)                     | 1.555    | 1.555 | .....    | #     | 46 Check       |
| PLAT754_ALERT_4_C Contact Calc | 2.52000, | Rep   | 2.519(8) | ..... | Senseless s.u. |
| C(9) -H(2)                     | 1.555    | 1.555 | .....    | #     | 46 Check       |
| PLAT754_ALERT_4_C Contact Calc | 3.25000, | Rep   | 3.254(7) | ..... | Senseless s.u. |
| C(9) -H(3)                     | 1.555    | 1.555 | .....    | #     | 46 Check       |
| PLAT754_ALERT_4_C Contact Calc | 2.61000, | Rep   | 2.614(8) | ..... | Senseless s.u. |
| C(9) -H(8)                     | 1.555    | 1.555 | .....    | #     | 46 Check       |
| PLAT754_ALERT_4_C Contact Calc | 3.14000, | Rep   | 3.144(8) | ..... | Senseless s.u. |
| C(9) -H(9)                     | 1.555    | 1.555 | .....    | #     | 46 Check       |
| PLAT754_ALERT_4_C Contact Calc | 3.33000, | Rep   | 3.328(7) | ..... | Senseless s.u. |
| C(9) -H(10)                    | 1.555    | 1.555 | .....    | #     | 46 Check       |
| PLAT754_ALERT_4_C Contact Calc | 3.27000, | Rep   | 3.271(7) | ..... | Senseless s.u. |
| C(9) -H(11)                    | 1.555    | 2.545 | .....    | #     | 46 Check       |
| PLAT754_ALERT_4_C Contact Calc | 3.37000, | Rep   | 3.372(7) | ..... | Senseless s.u. |
| C(10)-H(4)                     | 1.555    | 2.545 | .....    | #     | 46 Check       |
| PLAT754_ALERT_4_C Contact Calc | 3.58000, | Rep   | 3.580(7) | ..... | Senseless s.u. |
| C(10)-H(5)                     | 1.555    | 1.555 | .....    | #     | 46 Check       |
| PLAT754_ALERT_4_C Contact Calc | 3.15000, | Rep   | 3.148(8) | ..... | Senseless s.u. |
| C(10)-H(6)                     | 1.555    | 1.555 | .....    | #     | 46 Check       |
| PLAT754_ALERT_4_C Contact Calc | 2.50000, | Rep   | 2.504(8) | ..... | Senseless s.u. |
| C(10)-H(7)                     | 1.555    | 1.555 | .....    | #     | 46 Check       |
| PLAT754_ALERT_4_C Contact Calc | 3.35000, | Rep   | 3.350(7) | ..... | Senseless s.u. |
| C(10)-H(10)                    | 1.555    | 1.555 | .....    | #     | 46 Check       |
| PLAT754_ALERT_4_C Contact Calc | 3.25000, | Rep   | 3.251(7) | ..... | Senseless s.u. |
| C(10)-H(11)                    | 1.555    | 2.545 | .....    | #     | 46 Check       |
| PLAT754_ALERT_4_C Contact Calc | 3.49000, | Rep   | 3.488(9) | ..... | Senseless s.u. |
| C(10)-H(13)                    | 1.555    | 1.655 | .....    | #     | 46 Check       |
| PLAT754_ALERT_4_C Contact Calc | 2.02000, | Rep   | 2.020(7) | ..... | Senseless s.u. |
| C(11)-H(1)                     | 1.555    | 1.555 | .....    | #     | 46 Check       |
| PLAT754_ALERT_4_C Contact Calc | 3.17000, | Rep   | 3.174(7) | ..... | Senseless s.u. |
| C(11)-H(2)                     | 1.555    | 1.555 | .....    | #     | 46 Check       |
| PLAT754_ALERT_4_C Contact Calc | 2.97000, | Rep   | 2.974(7) | ..... | Senseless s.u. |
| C(11)-H(3)                     | 1.555    | 1.555 | .....    | #     | 46 Check       |
| PLAT754_ALERT_4_C Contact Calc | 2.39000, | Rep   | 2.393(7) | ..... | Senseless s.u. |
| C(11)-H(4)                     | 1.555    | 1.555 | .....    | #     | 46 Check       |
| PLAT754_ALERT_4_C Contact Calc | 3.26000, | Rep   | 3.258(6) | ..... | Senseless s.u. |
| C(11)-H(5)                     | 1.555    | 2.555 | .....    | #     | 46 Check       |
| PLAT754_ALERT_4_C Contact Calc | 3.30000, | Rep   | 3.297(7) | ..... | Senseless s.u. |
| C(11)-H(6)                     | 1.555    | 1.555 | .....    | #     | 46 Check       |
| PLAT754_ALERT_4_C Contact Calc | 2.72000, | Rep   | 2.722(7) | ..... | Senseless s.u. |
| C(11)-H(7)                     | 1.555    | 1.555 | .....    | #     | 46 Check       |
| PLAT754_ALERT_4_C Contact Calc | 2.94000, | Rep   | 2.943(7) | ..... | Senseless s.u. |
| C(11)-H(8)                     | 1.555    | 1.555 | .....    | #     | 46 Check       |
| PLAT754_ALERT_4_C Contact Calc | 3.19000, | Rep   | 3.193(7) | ..... | Senseless s.u. |
| C(11)-H(9)                     | 1.555    | 1.555 | .....    | #     | 46 Check       |
| PLAT754_ALERT_4_C Contact Calc | 3.08000, | Rep   | 3.080(8) | ..... | Senseless s.u. |
| C(11)-H(13)                    | 1.555    | 1.655 | .....    | #     | 46 Check       |
| PLAT754_ALERT_4_C Contact Calc | 2.78000, | Rep   | 2.783(7) | ..... | Senseless s.u. |
| C(12)-H(2)                     | 1.555    | 1.555 | .....    | #     | 46 Check       |
| PLAT754_ALERT_4_C Contact Calc | 2.62000, | Rep   | 2.617(7) | ..... | Senseless s.u. |
| C(12)-H(3)                     | 1.555    | 1.555 | .....    | #     | 46 Check       |
| PLAT754_ALERT_4_C Contact Calc | 2.04000, | Rep   | 2.042(7) | ..... | Senseless s.u. |

|                                |          |       |           |       |                |
|--------------------------------|----------|-------|-----------|-------|----------------|
| C(12)-H(4)                     | 1.555    | 1.555 | .....     | #     | 46 Check       |
| PLAT754_ALERT_4_C Contact Calc | 2.70000, | Rep   | 2.702(6)  | ..... | Senseless s.u. |
| C(12)-H(5)                     | 1.555    | 1.555 | .....     | #     | 46 Check       |
| PLAT754_ALERT_4_C Contact Calc | 2.03000, | Rep   | 2.028(7)  | ..... | Senseless s.u. |
| C(12)-H(11)                    | 1.555    | 1.555 | .....     | #     | 46 Check       |
| PLAT754_ALERT_4_C Contact Calc | 3.26000, | Rep   | 3.261(8)  | ..... | Senseless s.u. |
| C(12)-H(12)                    | 1.555    | 1.555 | .....     | #     | 46 Check       |
| PLAT754_ALERT_4_C Contact Calc | 3.26000, | Rep   | 3.261(9)  | ..... | Senseless s.u. |
| C(12)-H(14)                    | 1.555    | 1.555 | .....     | #     | 46 Check       |
| PLAT754_ALERT_4_C Contact Calc | 2.03000, | Rep   | 2.028(7)  | ..... | Senseless s.u. |
| C(12)-H(15)                    | 1.555    | 1.555 | .....     | #     | 46 Check       |
| PLAT754_ALERT_4_C Contact Calc | 2.55000, | Rep   | 2.552(7)  | ..... | Senseless s.u. |
| C(13)-H(4)                     | 1.555    | 1.555 | .....     | #     | 46 Check       |
| PLAT754_ALERT_4_C Contact Calc | 3.18000, | Rep   | 3.179(7)  | ..... | Senseless s.u. |
| C(13)-H(8)                     | 1.555    | 2.555 | .....     | #     | 46 Check       |
| PLAT754_ALERT_4_C Contact Calc | 2.03000, | Rep   | 2.034(8)  | ..... | Senseless s.u. |
| C(13)-H(12)                    | 1.555    | 1.555 | .....     | #     | 46 Check       |
| PLAT754_ALERT_4_C Contact Calc | 3.24000, | Rep   | 3.237(9)  | ..... | Senseless s.u. |
| C(13)-H(13)                    | 1.555    | 1.555 | .....     | #     | 46 Check       |
| PLAT754_ALERT_4_C Contact Calc | 3.23000, | Rep   | 3.229(7)  | ..... | Senseless s.u. |
| C(13)-H(15)                    | 1.555    | 1.555 | .....     | #     | 46 Check       |
| PLAT754_ALERT_4_C Contact Calc | 2.04000, | Rep   | 2.037(9)  | ..... | Senseless s.u. |
| C(14)-H(11)                    | 1.555    | 1.555 | .....     | #     | 46 Check       |
| PLAT754_ALERT_4_C Contact Calc | 2.00000, | Rep   | 2.004(9)  | ..... | Senseless s.u. |
| C(14)-H(13)                    | 1.555    | 1.555 | .....     | #     | 46 Check       |
| PLAT754_ALERT_4_C Contact Calc | 3.20000, | Rep   | 3.198(9)  | ..... | Senseless s.u. |
| C(14)-H(14)                    | 1.555    | 1.555 | .....     | #     | 46 Check       |
| PLAT754_ALERT_4_C Contact Calc | 3.42000, | Rep   | 3.416(9)  | ..... | Senseless s.u. |
| C(15)-H(8)                     | 1.555    | 1.455 | .....     | #     | 46 Check       |
| PLAT754_ALERT_4_C Contact Calc | 3.23000, | Rep   | 3.230(9)  | ..... | Senseless s.u. |
| C(15)-H(11)                    | 1.555    | 1.555 | .....     | #     | 46 Check       |
| PLAT754_ALERT_4_C Contact Calc | 2.00000, | Rep   | 1.997(9)  | ..... | Senseless s.u. |
| C(15)-H(12)                    | 1.555    | 1.555 | .....     | #     | 46 Check       |
| PLAT754_ALERT_4_C Contact Calc | 2.00000, | Rep   | 2.003(10) | ..... | Senseless s.u. |
| C(15)-H(14)                    | 1.555    | 1.555 | .....     | #     | 46 Check       |
| PLAT754_ALERT_4_C Contact Calc | 3.22000, | Rep   | 3.221(9)  | ..... | Senseless s.u. |
| C(15)-H(15)                    | 1.555    | 1.555 | .....     | #     | 46 Check       |
| PLAT754_ALERT_4_C Contact Calc | 3.38000, | Rep   | 3.377(9)  | ..... | Senseless s.u. |
| C(16)-H(1)                     | 1.555    | 3.556 | .....     | #     | 46 Check       |
| PLAT754_ALERT_4_C Contact Calc | 3.55000, | Rep   | 3.552(8)  | ..... | Senseless s.u. |
| C(16)-H(3)                     | 1.555    | 3.556 | .....     | #     | 46 Check       |
| PLAT754_ALERT_4_C Contact Calc | 3.20000, | Rep   | 3.196(9)  | ..... | Senseless s.u. |
| C(16)-H(12)                    | 1.555    | 1.555 | .....     | #     | 46 Check       |
| PLAT754_ALERT_4_C Contact Calc | 3.33000, | Rep   | 3.326(9)  | ..... | Senseless s.u. |
| C(16)-H(12)                    | 1.555    | 2.445 | .....     | #     | 46 Check       |
| PLAT754_ALERT_4_C Contact Calc | 2.00000, | Rep   | 1.996(10) | ..... | Senseless s.u. |
| C(16)-H(13)                    | 1.555    | 1.555 | .....     | #     | 46 Check       |
| PLAT754_ALERT_4_C Contact Calc | 2.03000, | Rep   | 2.027(10) | ..... | Senseless s.u. |
| C(16)-H(15)                    | 1.555    | 1.555 | .....     | #     | 46 Check       |
| PLAT754_ALERT_4_C Contact Calc | 2.87000, | Rep   | 2.873(9)  | ..... | Senseless s.u. |
| C(17)-H(2)                     | 1.555    | 1.555 | .....     | #     | 46 Check       |
| PLAT754_ALERT_4_C Contact Calc | 2.97000, | Rep   | 2.975(9)  | ..... | Senseless s.u. |
| C(17)-H(3)                     | 1.555    | 1.555 | .....     | #     | 46 Check       |
| PLAT754_ALERT_4_C Contact Calc | 3.44000, | Rep   | 3.441(8)  | ..... | Senseless s.u. |
| C(17)-H(3)                     | 1.555    | 3.556 | .....     | #     | 46 Check       |
| PLAT754_ALERT_4_C Contact Calc | 3.30000, | Rep   | 3.303(8)  | ..... | Senseless s.u. |
| C(17)-H(4)                     | 1.555    | 1.555 | .....     | #     | 46 Check       |
| PLAT754_ALERT_4_C Contact Calc | 3.12000, | Rep   | 3.118(8)  | ..... | Senseless s.u. |
| C(17)-H(5)                     | 1.555    | 1.555 | .....     | #     | 46 Check       |
| PLAT754_ALERT_4_C Contact Calc | 3.24000, | Rep   | 3.235(7)  | ..... | Senseless s.u. |
| C(17)-H(11)                    | 1.555    | 1.555 | .....     | #     | 46 Check       |
| PLAT754_ALERT_4_C Contact Calc | 3.40000, | Rep   | 3.403(8)  | ..... | Senseless s.u. |

|                                |          |       |           |       |                |
|--------------------------------|----------|-------|-----------|-------|----------------|
| C(17)-H(12)                    | 1.555    | 2.445 | .....     | #     | 46 Check       |
| PLAT754_ALERT_4_C Contact Calc | 3.22000, | Rep   | 3.219(9)  | ..... | Senseless s.u. |
| C(17)-H(13)                    | 1.555    | 1.555 | .....     | #     | 46 Check       |
| PLAT754_ALERT_4_C Contact Calc | 2.02000, | Rep   | 2.020(10) | ..... | Senseless s.u. |
| C(17)-H(14)                    | 1.555    | 1.555 | .....     | #     | 46 Check       |
| PLAT754_ALERT_4_C Contact Calc | 3.26000, | Rep   | 3.257(8)  | ..... | Senseless s.u. |
| C(18)-H(6)                     | 1.555    | 2.555 | .....     | #     | 46 Check       |
| PLAT754_ALERT_4_C Contact Calc | 3.02000, | Rep   | 3.024(10) | ..... | Senseless s.u. |
| C(19)-H(6)                     | 1.555    | 2.555 | .....     | #     | 46 Check       |
| PLAT754_ALERT_4_C Contact Calc | 3.37000, | Rep   | 3.371(12) | ..... | Senseless s.u. |
| C(19)-H(8)                     | 1.555    | 3.655 | .....     | #     | 46 Check       |
| PLAT754_ALERT_4_C Contact Calc | 3.12000, | Rep   | 3.119(9)  | ..... | Senseless s.u. |
| C(20)-H(2)                     | 1.555    | 2.555 | .....     | #     | 46 Check       |
| PLAT754_ALERT_4_C Contact Calc | 3.14000, | Rep   | 3.141(11) | ..... | Senseless s.u. |
| C(20)-H(6)                     | 1.555    | 2.555 | .....     | #     | 46 Check       |
| PLAT754_ALERT_4_C Contact Calc | 3.16000, | Rep   | 3.163(11) | ..... | Senseless s.u. |
| C(20)-H(8)                     | 1.555    | 3.655 | .....     | #     | 46 Check       |
| PLAT754_ALERT_4_C Contact Calc | 3.22000, | Rep   | 3.217(12) | ..... | Senseless s.u. |
| C(20)-H(9)                     | 1.555    | 3.655 | .....     | #     | 46 Check       |
| PLAT754_ALERT_4_C Contact Calc | 3.19000, | Rep   | 3.189(8)  | ..... | Senseless s.u. |
| C(21)-H(2)                     | 1.555    | 2.555 | .....     | #     | 46 Check       |
| PLAT754_ALERT_4_C Contact Calc | 3.45000, | Rep   | 3.446(9)  | ..... | Senseless s.u. |
| C(21)-H(6)                     | 1.555    | 2.555 | .....     | #     | 46 Check       |
| PLAT754_ALERT_4_C Contact Calc | 3.19000, | Rep   | 3.185(9)  | ..... | Senseless s.u. |
| C(21)-H(10)                    | 1.555    | 1.555 | .....     | #     | 46 Check       |
| PLAT754_ALERT_4_C Contact Calc | 3.51000, | Rep   | 3.515(8)  | ..... | Senseless s.u. |
| C(21)-H(15)                    | 1.555    | 2.555 | .....     | #     | 46 Check       |
| PLAT754_ALERT_4_C Contact Calc | 3.28000, | Rep   | 3.283(7)  | ..... | Senseless s.u. |
| C(22)-H(1)                     | 1.555    | 2.545 | .....     | #     | 46 Check       |
| PLAT754_ALERT_4_C Contact Calc | 2.44000, | Rep   | 2.443(7)  | ..... | Senseless s.u. |
| C(22)-H(5)                     | 1.555    | 1.555 | .....     | #     | 46 Check       |
| PLAT754_ALERT_4_C Contact Calc | 2.94000, | Rep   | 2.940(8)  | ..... | Senseless s.u. |
| C(22)-H(9)                     | 1.555    | 1.555 | .....     | #     | 46 Check       |
| PLAT754_ALERT_4_C Contact Calc | 3.08000, | Rep   | 3.082(7)  | ..... | Senseless s.u. |
| C(22)-H(10)                    | 1.555    | 2.545 | .....     | #     | 46 Check       |
| PLAT754_ALERT_4_C Contact Calc | 3.39000, | Rep   | 3.393(7)  | ..... | Senseless s.u. |
| C(22)-H(11)                    | 1.555    | 3.555 | .....     | #     | 46 Check       |
| PLAT754_ALERT_4_C Contact Calc | 3.23000, | Rep   | 3.230(6)  | ..... | Senseless s.u. |
| H(1) -O(1)                     | 1.555    | 1.555 | .....     | #     | 46 Check       |
| PLAT754_ALERT_4_C Contact Calc | 2.61000, | Rep   | 2.613(7)  | ..... | Senseless s.u. |
| H(1) -N(1)                     | 1.555    | 2.555 | .....     | #     | 46 Check       |
| PLAT754_ALERT_4_C Contact Calc | 2.07000, | Rep   | 2.067(7)  | ..... | Senseless s.u. |
| H(1) -C(2)                     | 1.555    | 1.555 | .....     | #     | 46 Check       |
| PLAT754_ALERT_4_C Contact Calc | 3.33000, | Rep   | 3.333(7)  | ..... | Senseless s.u. |
| H(1) -C(3)                     | 1.555    | 1.555 | .....     | #     | 46 Check       |
| PLAT754_ALERT_4_C Contact Calc | 3.16000, | Rep   | 3.157(8)  | ..... | Senseless s.u. |
| H(1) -C(8)                     | 1.555    | 1.555 | .....     | #     | 46 Check       |
| PLAT754_ALERT_4_C Contact Calc | 2.03000, | Rep   | 2.028(7)  | ..... | Senseless s.u. |
| H(1) -C(9)                     | 1.555    | 1.555 | .....     | #     | 46 Check       |
| PLAT754_ALERT_4_C Contact Calc | 2.02000, | Rep   | 2.020(7)  | ..... | Senseless s.u. |
| H(1) -C(11)                    | 1.555    | 1.555 | .....     | #     | 46 Check       |
| PLAT754_ALERT_4_C Contact Calc | 3.38000, | Rep   | 3.377(9)  | ..... | Senseless s.u. |
| H(1) -C(16)                    | 1.555    | 3.556 | .....     | #     | 46 Check       |
| PLAT754_ALERT_4_C Contact Calc | 3.28000, | Rep   | 3.283(7)  | ..... | Senseless s.u. |
| H(1) -C(22)                    | 1.555    | 2.555 | .....     | #     | 46 Check       |
| PLAT754_ALERT_4_C Contact Calc | 2.58000, | Rep   | 2.577(7)  | ..... | Senseless s.u. |
| H(1) -H(2)                     | 1.555    | 1.555 | .....     | #     | 46 Check       |
| PLAT754_ALERT_4_C Contact Calc | 2.17000, | Rep   | 2.169(7)  | ..... | Senseless s.u. |
| H(1) -H(3)                     | 1.555    | 1.555 | .....     | #     | 46 Check       |
| PLAT754_ALERT_4_C Contact Calc | 3.36000, | Rep   | 3.357(7)  | ..... | Senseless s.u. |
| H(1) -H(4)                     | 1.555    | 1.555 | .....     | #     | 46 Check       |
| PLAT754_ALERT_4_C Contact Calc | 2.37000, | Rep   | 2.369(7)  | ..... | Senseless s.u. |



|                                |          |       |          |       |                |
|--------------------------------|----------|-------|----------|-------|----------------|
| H(1) -H(6)                     | 1.555    | 1.555 | .....    | #     | 46 Check       |
| PLAT754_ALERT_4_C Contact Calc | 2.25000, | Rep   | 2.255(7) | ..... | Senseless s.u. |
| H(1) -H(7)                     | 1.555    | 1.555 | .....    | #     | 46 Check       |
| PLAT754_ALERT_4_C Contact Calc | 2.34000, | Rep   | 2.342(7) | ..... | Senseless s.u. |
| H(1) -H(10)                    | 1.555    | 1.555 | .....    | #     | 46 Check       |
| PLAT754_ALERT_4_C Contact Calc | 2.70000, | Rep   | 2.699(9) | ..... | Senseless s.u. |
| H(1) -H(14)                    | 1.555    | 3.556 | .....    | #     | 46 Check       |
| PLAT754_ALERT_4_C Contact Calc | 2.93000, | Rep   | 2.928(6) | ..... | Senseless s.u. |
| H(2) -O(1)                     | 1.555    | 1.555 | .....    | #     | 46 Check       |
| PLAT754_ALERT_4_C Contact Calc | 2.06000, | Rep   | 2.058(7) | ..... | Senseless s.u. |
| H(2) -C(1)                     | 1.555    | 1.555 | .....    | #     | 46 Check       |
| PLAT754_ALERT_4_C Contact Calc | 2.04000, | Rep   | 2.038(6) | ..... | Senseless s.u. |
| H(2) -C(3)                     | 1.555    | 1.555 | .....    | #     | 46 Check       |
| PLAT754_ALERT_4_C Contact Calc | 2.66000, | Rep   | 2.664(7) | ..... | Senseless s.u. |
| H(2) -C(4)                     | 1.555    | 1.555 | .....    | #     | 46 Check       |
| PLAT754_ALERT_4_C Contact Calc | 2.52000, | Rep   | 2.519(8) | ..... | Senseless s.u. |
| H(2) -C(9)                     | 1.555    | 1.555 | .....    | #     | 46 Check       |
| PLAT754_ALERT_4_C Contact Calc | 3.17000, | Rep   | 3.174(7) | ..... | Senseless s.u. |
| H(2) -C(11)                    | 1.555    | 1.555 | .....    | #     | 46 Check       |
| PLAT754_ALERT_4_C Contact Calc | 2.78000, | Rep   | 2.783(7) | ..... | Senseless s.u. |
| H(2) -C(12)                    | 1.555    | 1.555 | .....    | #     | 46 Check       |
| PLAT754_ALERT_4_C Contact Calc | 2.87000, | Rep   | 2.873(9) | ..... | Senseless s.u. |
| H(2) -C(17)                    | 1.555    | 1.555 | .....    | #     | 46 Check       |
| PLAT754_ALERT_4_C Contact Calc | 3.12000, | Rep   | 3.119(9) | ..... | Senseless s.u. |
| H(2) -C(20)                    | 1.555    | 2.545 | .....    | #     | 46 Check       |
| PLAT754_ALERT_4_C Contact Calc | 3.19000, | Rep   | 3.189(8) | ..... | Senseless s.u. |
| H(2) -C(21)                    | 1.555    | 2.545 | .....    | #     | 46 Check       |
| PLAT754_ALERT_4_C Contact Calc | 2.58000, | Rep   | 2.577(7) | ..... | Senseless s.u. |
| H(2) -H(1)                     | 1.555    | 1.555 | .....    | #     | 46 Check       |
| PLAT754_ALERT_4_C Contact Calc | 1.55000, | Rep   | 1.551(7) | ..... | Senseless s.u. |
| H(2) -H(3)                     | 1.555    | 1.555 | .....    | #     | 46 Check       |
| PLAT754_ALERT_4_C Contact Calc | 2.78000, | Rep   | 2.781(6) | ..... | Senseless s.u. |
| H(2) -H(4)                     | 1.555    | 1.555 | .....    | #     | 46 Check       |
| PLAT754_ALERT_4_C Contact Calc | 2.59000, | Rep   | 2.593(7) | ..... | Senseless s.u. |
| H(2) -H(5)                     | 1.555    | 1.555 | .....    | #     | 46 Check       |
| PLAT754_ALERT_4_C Contact Calc | 2.35000, | Rep   | 2.352(8) | ..... | Senseless s.u. |
| H(2) -H(6)                     | 1.555    | 1.555 | .....    | #     | 46 Check       |
| PLAT754_ALERT_4_C Contact Calc | 3.42000, | Rep   | 3.419(8) | ..... | Senseless s.u. |
| H(2) -H(7)                     | 1.555    | 1.555 | .....    | #     | 46 Check       |
| PLAT754_ALERT_4_C Contact Calc | 2.34000, | Rep   | 2.335(9) | ..... | Senseless s.u. |
| H(2) -H(15)                    | 1.555    | 1.555 | .....    | #     | 46 Check       |
| PLAT754_ALERT_4_C Contact Calc | 2.08000, | Rep   | 2.080(7) | ..... | Senseless s.u. |
| H(3) -C(1)                     | 1.555    | 1.555 | .....    | #     | 46 Check       |
| PLAT754_ALERT_4_C Contact Calc | 2.06000, | Rep   | 2.063(6) | ..... | Senseless s.u. |
| H(3) -C(3)                     | 1.555    | 1.555 | .....    | #     | 46 Check       |
| PLAT754_ALERT_4_C Contact Calc | 3.36000, | Rep   | 3.363(6) | ..... | Senseless s.u. |
| H(3) -C(4)                     | 1.555    | 1.555 | .....    | #     | 46 Check       |
| PLAT754_ALERT_4_C Contact Calc | 3.25000, | Rep   | 3.254(7) | ..... | Senseless s.u. |
| H(3) -C(9)                     | 1.555    | 1.555 | .....    | #     | 46 Check       |
| PLAT754_ALERT_4_C Contact Calc | 2.97000, | Rep   | 2.974(7) | ..... | Senseless s.u. |
| H(3) -C(11)                    | 1.555    | 1.555 | .....    | #     | 46 Check       |
| PLAT754_ALERT_4_C Contact Calc | 2.62000, | Rep   | 2.617(7) | ..... | Senseless s.u. |
| H(3) -C(12)                    | 1.555    | 1.555 | .....    | #     | 46 Check       |
| PLAT754_ALERT_4_C Contact Calc | 3.55000, | Rep   | 3.552(8) | ..... | Senseless s.u. |
| H(3) -C(16)                    | 1.555    | 3.556 | .....    | #     | 46 Check       |
| PLAT754_ALERT_4_C Contact Calc | 2.97000, | Rep   | 2.975(9) | ..... | Senseless s.u. |
| H(3) -C(17)                    | 1.555    | 1.555 | .....    | #     | 46 Check       |
| PLAT754_ALERT_4_C Contact Calc | 3.44000, | Rep   | 3.441(8) | ..... | Senseless s.u. |
| H(3) -C(17)                    | 1.555    | 3.556 | .....    | #     | 46 Check       |
| PLAT754_ALERT_4_C Contact Calc | 2.17000, | Rep   | 2.169(7) | ..... | Senseless s.u. |
| H(3) -H(1)                     | 1.555    | 1.555 | .....    | #     | 46 Check       |
| PLAT754_ALERT_4_C Contact Calc | 1.55000, | Rep   | 1.551(7) | ..... | Senseless s.u. |

|                                |          |       |          |       |                |
|--------------------------------|----------|-------|----------|-------|----------------|
| H(3) -H(2)                     | 1.555    | 1.555 | .....    | #     | 46 Check       |
| PLAT754_ALERT_4_C Contact Calc | 2.41000, | Rep   | 2.407(6) | ..... | Senseless s.u. |
| H(3) -H(4)                     | 1.555    | 1.555 | .....    | #     | 46 Check       |
| PLAT754_ALERT_4_C Contact Calc | 3.28000, | Rep   | 3.277(7) | ..... | Senseless s.u. |
| H(3) -H(6)                     | 1.555    | 1.555 | .....    | #     | 46 Check       |
| PLAT754_ALERT_4_C Contact Calc | 3.47000, | Rep   | 3.474(7) | ..... | Senseless s.u. |
| H(3) -H(9)                     | 1.555    | 2.555 | .....    | #     | 46 Check       |
| PLAT754_ALERT_4_C Contact Calc | 3.20000, | Rep   | 3.201(7) | ..... | Senseless s.u. |
| H(3) -H(10)                    | 1.555    | 1.555 | .....    | #     | 46 Check       |
| PLAT754_ALERT_4_C Contact Calc | 3.24000, | Rep   | 3.239(8) | ..... | Senseless s.u. |
| H(3) -H(14)                    | 1.555    | 3.556 | .....    | #     | 46 Check       |
| PLAT754_ALERT_4_C Contact Calc | 2.77000, | Rep   | 2.774(8) | ..... | Senseless s.u. |
| H(3) -H(15)                    | 1.555    | 1.555 | .....    | #     | 46 Check       |
| PLAT754_ALERT_4_C Contact Calc | 3.03000, | Rep   | 3.032(8) | ..... | Senseless s.u. |
| H(3) -H(15)                    | 1.555    | 3.556 | .....    | #     | 46 Check       |
| PLAT754_ALERT_4_C Contact Calc | 2.63000, | Rep   | 2.630(5) | ..... | Senseless s.u. |
| H(4) -O(1)                     | 1.555    | 2.555 | .....    | #     | 46 Check       |
| PLAT754_ALERT_4_C Contact Calc | 2.77000, | Rep   | 2.773(7) | ..... | Senseless s.u. |
| H(4) -C(1)                     | 1.555    | 1.555 | .....    | #     | 46 Check       |
| PLAT754_ALERT_4_C Contact Calc | 2.06000, | Rep   | 2.056(6) | ..... | Senseless s.u. |
| H(4) -C(2)                     | 1.555    | 1.555 | .....    | #     | 46 Check       |
| PLAT754_ALERT_4_C Contact Calc | 2.01000, | Rep   | 2.014(6) | ..... | Senseless s.u. |
| H(4) -C(4)                     | 1.555    | 1.555 | .....    | #     | 46 Check       |
| PLAT754_ALERT_4_C Contact Calc | 2.64000, | Rep   | 2.638(6) | ..... | Senseless s.u. |
| H(4) -C(5)                     | 1.555    | 1.555 | .....    | #     | 46 Check       |
| PLAT754_ALERT_4_C Contact Calc | 2.85000, | Rep   | 2.850(7) | ..... | Senseless s.u. |
| H(4) -C(6)                     | 1.555    | 1.555 | .....    | #     | 46 Check       |
| PLAT754_ALERT_4_C Contact Calc | 3.08000, | Rep   | 3.075(8) | ..... | Senseless s.u. |
| H(4) -C(7)                     | 1.555    | 1.555 | .....    | #     | 46 Check       |
| PLAT754_ALERT_4_C Contact Calc | 2.87000, | Rep   | 2.867(7) | ..... | Senseless s.u. |
| H(4) -C(8)                     | 1.555    | 1.555 | .....    | #     | 46 Check       |
| PLAT754_ALERT_4_C Contact Calc | 3.37000, | Rep   | 3.372(7) | ..... | Senseless s.u. |
| H(4) -C(10)                    | 1.555    | 2.555 | .....    | #     | 46 Check       |
| PLAT754_ALERT_4_C Contact Calc | 2.39000, | Rep   | 2.393(7) | ..... | Senseless s.u. |
| H(4) -C(11)                    | 1.555    | 1.555 | .....    | #     | 46 Check       |
| PLAT754_ALERT_4_C Contact Calc | 2.04000, | Rep   | 2.042(7) | ..... | Senseless s.u. |
| H(4) -C(12)                    | 1.555    | 1.555 | .....    | #     | 46 Check       |
| PLAT754_ALERT_4_C Contact Calc | 2.55000, | Rep   | 2.552(7) | ..... | Senseless s.u. |
| H(4) -C(13)                    | 1.555    | 1.555 | .....    | #     | 46 Check       |
| PLAT754_ALERT_4_C Contact Calc | 3.30000, | Rep   | 3.303(8) | ..... | Senseless s.u. |
| H(4) -C(17)                    | 1.555    | 1.555 | .....    | #     | 46 Check       |
| PLAT754_ALERT_4_C Contact Calc | 3.36000, | Rep   | 3.357(7) | ..... | Senseless s.u. |
| H(4) -H(1)                     | 1.555    | 1.555 | .....    | #     | 46 Check       |
| PLAT754_ALERT_4_C Contact Calc | 2.78000, | Rep   | 2.781(6) | ..... | Senseless s.u. |
| H(4) -H(2)                     | 1.555    | 1.555 | .....    | #     | 46 Check       |
| PLAT754_ALERT_4_C Contact Calc | 2.41000, | Rep   | 2.407(6) | ..... | Senseless s.u. |
| H(4) -H(3)                     | 1.555    | 1.555 | .....    | #     | 46 Check       |
| PLAT754_ALERT_4_C Contact Calc | 2.82000, | Rep   | 2.821(6) | ..... | Senseless s.u. |
| H(4) -H(5)                     | 1.555    | 1.555 | .....    | #     | 46 Check       |
| PLAT754_ALERT_4_C Contact Calc | 3.51000, | Rep   | 3.512(7) | ..... | Senseless s.u. |
| H(4) -H(8)                     | 1.555    | 2.555 | .....    | #     | 46 Check       |
| PLAT754_ALERT_4_C Contact Calc | 3.25000, | Rep   | 3.244(7) | ..... | Senseless s.u. |
| H(4) -H(9)                     | 1.555    | 2.555 | .....    | #     | 46 Check       |
| PLAT754_ALERT_4_C Contact Calc | 2.52000, | Rep   | 2.515(7) | ..... | Senseless s.u. |
| H(4) -H(10)                    | 1.555    | 1.555 | .....    | #     | 46 Check       |
| PLAT754_ALERT_4_C Contact Calc | 2.35000, | Rep   | 2.350(7) | ..... | Senseless s.u. |
| H(4) -H(11)                    | 1.555    | 1.555 | .....    | #     | 46 Check       |
| PLAT754_ALERT_4_C Contact Calc | 3.59000, | Rep   | 3.591(8) | ..... | Senseless s.u. |
| H(4) -H(15)                    | 1.555    | 1.555 | .....    | #     | 46 Check       |
| PLAT754_ALERT_4_C Contact Calc | 3.08000, | Rep   | 3.085(6) | ..... | Senseless s.u. |
| H(5) -O(1)                     | 1.555    | 1.555 | .....    | #     | 46 Check       |
| PLAT754_ALERT_4_C Contact Calc | 3.29000, | Rep   | 3.285(7) | ..... | Senseless s.u. |

|                                |          |       |           |       |                |
|--------------------------------|----------|-------|-----------|-------|----------------|
| H(5) -N(1)                     | 1.555    | 1.555 | .....     | #     | 46 Check       |
| PLAT754_ALERT_4_C Contact Calc | 2.85000, | Rep   | 2.847(6)  | ..... | Senseless s.u. |
| H(5) -C(2)                     | 1.555    | 1.555 | .....     | #     | 46 Check       |
| PLAT754_ALERT_4_C Contact Calc | 2.10000, | Rep   | 2.099(6)  | ..... | Senseless s.u. |
| H(5) -C(3)                     | 1.555    | 1.555 | .....     | #     | 46 Check       |
| PLAT754_ALERT_4_C Contact Calc | 1.95000, | Rep   | 1.946(7)  | ..... | Senseless s.u. |
| H(5) -C(5)                     | 1.555    | 1.555 | .....     | #     | 46 Check       |
| PLAT754_ALERT_4_C Contact Calc | 3.35000, | Rep   | 3.350(7)  | ..... | Senseless s.u. |
| H(5) -C(6)                     | 1.555    | 1.555 | .....     | #     | 46 Check       |
| PLAT754_ALERT_4_C Contact Calc | 3.58000, | Rep   | 3.580(7)  | ..... | Senseless s.u. |
| H(5) -C(10)                    | 1.555    | 1.555 | .....     | #     | 46 Check       |
| PLAT754_ALERT_4_C Contact Calc | 3.26000, | Rep   | 3.258(6)  | ..... | Senseless s.u. |
| H(5) -C(11)                    | 1.555    | 2.545 | .....     | #     | 46 Check       |
| PLAT754_ALERT_4_C Contact Calc | 2.70000, | Rep   | 2.702(6)  | ..... | Senseless s.u. |
| H(5) -C(12)                    | 1.555    | 1.555 | .....     | #     | 46 Check       |
| PLAT754_ALERT_4_C Contact Calc | 3.12000, | Rep   | 3.118(8)  | ..... | Senseless s.u. |
| H(5) -C(17)                    | 1.555    | 1.555 | .....     | #     | 46 Check       |
| PLAT754_ALERT_4_C Contact Calc | 2.44000, | Rep   | 2.443(7)  | ..... | Senseless s.u. |
| H(5) -C(22)                    | 1.555    | 1.555 | .....     | #     | 46 Check       |
| PLAT754_ALERT_4_C Contact Calc | 2.59000, | Rep   | 2.593(7)  | ..... | Senseless s.u. |
| H(5) -H(2)                     | 1.555    | 1.555 | .....     | #     | 46 Check       |
| PLAT754_ALERT_4_C Contact Calc | 2.82000, | Rep   | 2.821(6)  | ..... | Senseless s.u. |
| H(5) -H(4)                     | 1.555    | 1.555 | .....     | #     | 46 Check       |
| PLAT754_ALERT_4_C Contact Calc | 3.41000, | Rep   | 3.412(7)  | ..... | Senseless s.u. |
| H(5) -H(9)                     | 1.555    | 1.555 | .....     | #     | 46 Check       |
| PLAT754_ALERT_4_C Contact Calc | 2.34000, | Rep   | 2.344(6)  | ..... | Senseless s.u. |
| H(5) -H(10)                    | 1.555    | 2.545 | .....     | #     | 46 Check       |
| PLAT754_ALERT_4_C Contact Calc | 2.99000, | Rep   | 2.994(8)  | ..... | Senseless s.u. |
| H(5) -H(15)                    | 1.555    | 1.555 | .....     | #     | 46 Check       |
| PLAT754_ALERT_4_C Contact Calc | 1.95000, | Rep   | 1.949(7)  | ..... | Senseless s.u. |
| H(6) -O(1)                     | 1.555    | 1.555 | .....     | #     | 46 Check       |
| PLAT754_ALERT_4_C Contact Calc | 2.03000, | Rep   | 2.034(7)  | ..... | Senseless s.u. |
| H(6) -C(1)                     | 1.555    | 1.555 | .....     | #     | 46 Check       |
| PLAT754_ALERT_4_C Contact Calc | 2.70000, | Rep   | 2.704(7)  | ..... | Senseless s.u. |
| H(6) -C(2)                     | 1.555    | 1.555 | .....     | #     | 46 Check       |
| PLAT754_ALERT_4_C Contact Calc | 3.53000, | Rep   | 3.533(7)  | ..... | Senseless s.u. |
| H(6) -C(6)                     | 1.555    | 2.545 | .....     | #     | 46 Check       |
| PLAT754_ALERT_4_C Contact Calc | 3.15000, | Rep   | 3.148(8)  | ..... | Senseless s.u. |
| H(6) -C(10)                    | 1.555    | 1.555 | .....     | #     | 46 Check       |
| PLAT754_ALERT_4_C Contact Calc | 3.30000, | Rep   | 3.297(7)  | ..... | Senseless s.u. |
| H(6) -C(11)                    | 1.555    | 1.555 | .....     | #     | 46 Check       |
| PLAT754_ALERT_4_C Contact Calc | 3.26000, | Rep   | 3.257(8)  | ..... | Senseless s.u. |
| H(6) -C(18)                    | 1.555    | 2.545 | .....     | #     | 46 Check       |
| PLAT754_ALERT_4_C Contact Calc | 3.02000, | Rep   | 3.024(10) | ..... | Senseless s.u. |
| H(6) -C(19)                    | 1.555    | 2.545 | .....     | #     | 46 Check       |
| PLAT754_ALERT_4_C Contact Calc | 3.14000, | Rep   | 3.141(11) | ..... | Senseless s.u. |
| H(6) -C(20)                    | 1.555    | 2.545 | .....     | #     | 46 Check       |
| PLAT754_ALERT_4_C Contact Calc | 3.45000, | Rep   | 3.446(9)  | ..... | Senseless s.u. |
| H(6) -C(21)                    | 1.555    | 2.545 | .....     | #     | 46 Check       |
| PLAT754_ALERT_4_C Contact Calc | 2.37000, | Rep   | 2.369(7)  | ..... | Senseless s.u. |
| H(6) -H(1)                     | 1.555    | 1.555 | .....     | #     | 46 Check       |
| PLAT754_ALERT_4_C Contact Calc | 2.35000, | Rep   | 2.352(8)  | ..... | Senseless s.u. |
| H(6) -H(2)                     | 1.555    | 1.555 | .....     | #     | 46 Check       |
| PLAT754_ALERT_4_C Contact Calc | 3.28000, | Rep   | 3.277(7)  | ..... | Senseless s.u. |
| H(6) -H(3)                     | 1.555    | 1.555 | .....     | #     | 46 Check       |
| PLAT754_ALERT_4_C Contact Calc | 1.55000, | Rep   | 1.551(8)  | ..... | Senseless s.u. |
| H(6) -H(7)                     | 1.555    | 1.555 | .....     | #     | 46 Check       |
| PLAT754_ALERT_4_C Contact Calc | 3.43000, | Rep   | 3.427(8)  | ..... | Senseless s.u. |
| H(6) -H(8)                     | 1.555    | 1.555 | .....     | #     | 46 Check       |
| PLAT754_ALERT_4_C Contact Calc | 3.42000, | Rep   | 3.423(8)  | ..... | Senseless s.u. |
| H(6) -H(11)                    | 1.555    | 2.545 | .....     | #     | 46 Check       |
| PLAT754_ALERT_4_C Contact Calc | 1.96000, | Rep   | 1.964(7)  | ..... | Senseless s.u. |

|                                |          |       |           |       |                |
|--------------------------------|----------|-------|-----------|-------|----------------|
| H(7) -O(1)                     | 1.555    | 1.555 | .....     | #     | 46 Check       |
| PLAT754_ALERT_4_C Contact Calc | 2.99000, | Rep   | 2.990(8)  | ..... | Senseless s.u. |
| H(7) -N(1)                     | 1.555    | 4.545 | .....     | #     | 46 Check       |
| PLAT754_ALERT_4_C Contact Calc | 2.02000, | Rep   | 2.021(8)  | ..... | Senseless s.u. |
| H(7) -C(1)                     | 1.555    | 1.555 | .....     | #     | 46 Check       |
| PLAT754_ALERT_4_C Contact Calc | 3.38000, | Rep   | 3.379(8)  | ..... | Senseless s.u. |
| H(7) -C(2)                     | 1.555    | 1.555 | .....     | #     | 46 Check       |
| PLAT754_ALERT_4_C Contact Calc | 2.97000, | Rep   | 2.968(8)  | ..... | Senseless s.u. |
| H(7) -C(8)                     | 1.555    | 1.555 | .....     | #     | 46 Check       |
| PLAT754_ALERT_4_C Contact Calc | 2.50000, | Rep   | 2.504(8)  | ..... | Senseless s.u. |
| H(7) -C(10)                    | 1.555    | 1.555 | .....     | #     | 46 Check       |
| PLAT754_ALERT_4_C Contact Calc | 2.72000, | Rep   | 2.722(7)  | ..... | Senseless s.u. |
| H(7) -C(11)                    | 1.555    | 1.555 | .....     | #     | 46 Check       |
| PLAT754_ALERT_4_C Contact Calc | 2.25000, | Rep   | 2.255(7)  | ..... | Senseless s.u. |
| H(7) -H(1)                     | 1.555    | 1.555 | .....     | #     | 46 Check       |
| PLAT754_ALERT_4_C Contact Calc | 3.42000, | Rep   | 3.419(8)  | ..... | Senseless s.u. |
| H(7) -H(2)                     | 1.555    | 1.555 | .....     | #     | 46 Check       |
| PLAT754_ALERT_4_C Contact Calc | 1.55000, | Rep   | 1.551(8)  | ..... | Senseless s.u. |
| H(7) -H(6)                     | 1.555    | 1.555 | .....     | #     | 46 Check       |
| PLAT754_ALERT_4_C Contact Calc | 2.42000, | Rep   | 2.421(8)  | ..... | Senseless s.u. |
| H(7) -H(8)                     | 1.555    | 1.555 | .....     | #     | 46 Check       |
| PLAT754_ALERT_4_C Contact Calc | 3.40000, | Rep   | 3.397(8)  | ..... | Senseless s.u. |
| H(7) -H(9)                     | 1.555    | 1.555 | .....     | #     | 46 Check       |
| PLAT754_ALERT_4_C Contact Calc | 3.47000, | Rep   | 3.469(7)  | ..... | Senseless s.u. |
| H(7) -H(10)                    | 1.555    | 1.555 | .....     | #     | 46 Check       |
| PLAT754_ALERT_4_C Contact Calc | 2.93000, | Rep   | 2.932(7)  | ..... | Senseless s.u. |
| H(7) -H(11)                    | 1.555    | 2.545 | .....     | #     | 46 Check       |
| PLAT754_ALERT_4_C Contact Calc | 3.10000, | Rep   | 3.101(9)  | ..... | Senseless s.u. |
| H(7) -H(13)                    | 1.555    | 1.655 | .....     | #     | 46 Check       |
| PLAT754_ALERT_4_C Contact Calc | 2.96000, | Rep   | 2.963(9)  | ..... | Senseless s.u. |
| H(7) -H(14)                    | 1.555    | 1.655 | .....     | #     | 46 Check       |
| PLAT754_ALERT_4_C Contact Calc | 1.95000, | Rep   | 1.950(7)  | ..... | Senseless s.u. |
| H(8) -O(1)                     | 1.555    | 1.555 | .....     | #     | 46 Check       |
| PLAT754_ALERT_4_C Contact Calc | 3.34000, | Rep   | 3.337(8)  | ..... | Senseless s.u. |
| H(8) -C(1)                     | 1.555    | 1.555 | .....     | #     | 46 Check       |
| PLAT754_ALERT_4_C Contact Calc | 3.07000, | Rep   | 3.073(8)  | ..... | Senseless s.u. |
| H(8) -C(7)                     | 1.555    | 1.555 | .....     | #     | 46 Check       |
| PLAT754_ALERT_4_C Contact Calc | 2.05000, | Rep   | 2.055(7)  | ..... | Senseless s.u. |
| H(8) -C(8)                     | 1.555    | 1.555 | .....     | #     | 46 Check       |
| PLAT754_ALERT_4_C Contact Calc | 2.61000, | Rep   | 2.614(8)  | ..... | Senseless s.u. |
| H(8) -C(9)                     | 1.555    | 1.555 | .....     | #     | 46 Check       |
| PLAT754_ALERT_4_C Contact Calc | 2.94000, | Rep   | 2.943(7)  | ..... | Senseless s.u. |
| H(8) -C(11)                    | 1.555    | 1.555 | .....     | #     | 46 Check       |
| PLAT754_ALERT_4_C Contact Calc | 3.18000, | Rep   | 3.179(7)  | ..... | Senseless s.u. |
| H(8) -C(13)                    | 1.555    | 2.545 | .....     | #     | 46 Check       |
| PLAT754_ALERT_4_C Contact Calc | 3.42000, | Rep   | 3.416(9)  | ..... | Senseless s.u. |
| H(8) -C(15)                    | 1.555    | 1.655 | .....     | #     | 46 Check       |
| PLAT754_ALERT_4_C Contact Calc | 3.37000, | Rep   | 3.371(12) | ..... | Senseless s.u. |
| H(8) -C(19)                    | 1.555    | 3.655 | .....     | #     | 46 Check       |
| PLAT754_ALERT_4_C Contact Calc | 3.16000, | Rep   | 3.163(11) | ..... | Senseless s.u. |
| H(8) -C(20)                    | 1.555    | 3.655 | .....     | #     | 46 Check       |
| PLAT754_ALERT_4_C Contact Calc | 3.51000, | Rep   | 3.512(7)  | ..... | Senseless s.u. |
| H(8) -H(4)                     | 1.555    | 2.545 | .....     | #     | 46 Check       |
| PLAT754_ALERT_4_C Contact Calc | 3.43000, | Rep   | 3.427(8)  | ..... | Senseless s.u. |
| H(8) -H(6)                     | 1.555    | 1.555 | .....     | #     | 46 Check       |
| PLAT754_ALERT_4_C Contact Calc | 2.42000, | Rep   | 2.421(8)  | ..... | Senseless s.u. |
| H(8) -H(7)                     | 1.555    | 1.555 | .....     | #     | 46 Check       |
| PLAT754_ALERT_4_C Contact Calc | 1.55000, | Rep   | 1.551(8)  | ..... | Senseless s.u. |
| H(8) -H(9)                     | 1.555    | 1.555 | .....     | #     | 46 Check       |
| PLAT754_ALERT_4_C Contact Calc | 2.78000, | Rep   | 2.783(7)  | ..... | Senseless s.u. |
| H(8) -H(11)                    | 1.555    | 2.545 | .....     | #     | 46 Check       |
| PLAT754_ALERT_4_C Contact Calc | 2.96000, | Rep   | 2.964(9)  | ..... | Senseless s.u. |

|                                |          |       |           |       |                |
|--------------------------------|----------|-------|-----------|-------|----------------|
| H(8) -H(13)                    | 1.555    | 1.655 | .....     | #     | 46 Check       |
| PLAT754_ALERT_4_C Contact Calc | 3.50000, | Rep   | 3.500(9)  | ..... | Senseless s.u. |
| H(8) -H(14)                    | 1.555    | 1.655 | .....     | #     | 46 Check       |
| PLAT754_ALERT_4_C Contact Calc | 1.93000, | Rep   | 1.931(7)  | ..... | Senseless s.u. |
| H(9) -O(1)                     | 1.555    | 1.555 | .....     | #     | 46 Check       |
| PLAT754_ALERT_4_C Contact Calc | 3.55000, | Rep   | 3.552(8)  | ..... | Senseless s.u. |
| H(9) -N(1)                     | 1.555    | 1.555 | .....     | #     | 46 Check       |
| PLAT754_ALERT_4_C Contact Calc | 3.15000, | Rep   | 3.153(7)  | ..... | Senseless s.u. |
| H(9) -C(4)                     | 1.555    | 1.555 | .....     | #     | 46 Check       |
| PLAT754_ALERT_4_C Contact Calc | 2.66000, | Rep   | 2.664(7)  | ..... | Senseless s.u. |
| H(9) -C(5)                     | 1.555    | 1.555 | .....     | #     | 46 Check       |
| PLAT754_ALERT_4_C Contact Calc | 2.86000, | Rep   | 2.859(7)  | ..... | Senseless s.u. |
| H(9) -C(6)                     | 1.555    | 1.555 | .....     | #     | 46 Check       |
| PLAT754_ALERT_4_C Contact Calc | 2.56000, | Rep   | 2.560(7)  | ..... | Senseless s.u. |
| H(9) -C(7)                     | 1.555    | 1.555 | .....     | #     | 46 Check       |
| PLAT754_ALERT_4_C Contact Calc | 2.03000, | Rep   | 2.035(7)  | ..... | Senseless s.u. |
| H(9) -C(8)                     | 1.555    | 1.555 | .....     | #     | 46 Check       |
| PLAT754_ALERT_4_C Contact Calc | 3.14000, | Rep   | 3.144(8)  | ..... | Senseless s.u. |
| H(9) -C(9)                     | 1.555    | 1.555 | .....     | #     | 46 Check       |
| PLAT754_ALERT_4_C Contact Calc | 3.19000, | Rep   | 3.193(7)  | ..... | Senseless s.u. |
| H(9) -C(11)                    | 1.555    | 1.555 | .....     | #     | 46 Check       |
| PLAT754_ALERT_4_C Contact Calc | 3.22000, | Rep   | 3.217(12) | ..... | Senseless s.u. |
| H(9) -C(20)                    | 1.555    | 3.655 | .....     | #     | 46 Check       |
| PLAT754_ALERT_4_C Contact Calc | 2.94000, | Rep   | 2.940(8)  | ..... | Senseless s.u. |
| H(9) -C(22)                    | 1.555    | 1.555 | .....     | #     | 46 Check       |
| PLAT754_ALERT_4_C Contact Calc | 3.47000, | Rep   | 3.474(7)  | ..... | Senseless s.u. |
| H(9) -H(3)                     | 1.555    | 2.545 | .....     | #     | 46 Check       |
| PLAT754_ALERT_4_C Contact Calc | 3.25000, | Rep   | 3.244(7)  | ..... | Senseless s.u. |
| H(9) -H(4)                     | 1.555    | 2.545 | .....     | #     | 46 Check       |
| PLAT754_ALERT_4_C Contact Calc | 3.41000, | Rep   | 3.412(7)  | ..... | Senseless s.u. |
| H(9) -H(5)                     | 1.555    | 1.555 | .....     | #     | 46 Check       |
| PLAT754_ALERT_4_C Contact Calc | 3.40000, | Rep   | 3.397(8)  | ..... | Senseless s.u. |
| H(9) -H(7)                     | 1.555    | 1.555 | .....     | #     | 46 Check       |
| PLAT754_ALERT_4_C Contact Calc | 1.55000, | Rep   | 1.551(8)  | ..... | Senseless s.u. |
| H(9) -H(8)                     | 1.555    | 1.555 | .....     | #     | 46 Check       |
| PLAT754_ALERT_4_C Contact Calc | 3.42000, | Rep   | 3.422(7)  | ..... | Senseless s.u. |
| H(9) -H(10)                    | 1.555    | 2.545 | .....     | #     | 46 Check       |
| PLAT754_ALERT_4_C Contact Calc | 3.59000, | Rep   | 3.591(7)  | ..... | Senseless s.u. |
| H(9) -H(11)                    | 1.555    | 2.545 | .....     | #     | 46 Check       |
| PLAT754_ALERT_4_C Contact Calc | 2.97000, | Rep   | 2.969(6)  | ..... | Senseless s.u. |
| H(10)-O(1)                     | 1.555    | 2.555 | .....     | #     | 46 Check       |
| PLAT754_ALERT_4_C Contact Calc | 3.24000, | Rep   | 3.245(7)  | ..... | Senseless s.u. |
| H(10)-N(1)                     | 1.555    | 2.555 | .....     | #     | 46 Check       |
| PLAT754_ALERT_4_C Contact Calc | 2.16000, | Rep   | 2.156(7)  | ..... | Senseless s.u. |
| H(10)-C(1)                     | 1.555    | 1.555 | .....     | #     | 46 Check       |
| PLAT754_ALERT_4_C Contact Calc | 2.95000, | Rep   | 2.946(7)  | ..... | Senseless s.u. |
| H(10)-C(2)                     | 1.555    | 1.555 | .....     | #     | 46 Check       |
| PLAT754_ALERT_4_C Contact Calc | 3.12000, | Rep   | 3.117(7)  | ..... | Senseless s.u. |
| H(10)-C(3)                     | 1.555    | 1.555 | .....     | #     | 46 Check       |
| PLAT754_ALERT_4_C Contact Calc | 3.10000, | Rep   | 3.102(6)  | ..... | Senseless s.u. |
| H(10)-C(4)                     | 1.555    | 2.555 | .....     | #     | 46 Check       |
| PLAT754_ALERT_4_C Contact Calc | 3.48000, | Rep   | 3.478(7)  | ..... | Senseless s.u. |
| H(10)-C(5)                     | 1.555    | 2.555 | .....     | #     | 46 Check       |
| PLAT754_ALERT_4_C Contact Calc | 3.57000, | Rep   | 3.569(7)  | ..... | Senseless s.u. |
| H(10)-C(6)                     | 1.555    | 1.555 | .....     | #     | 46 Check       |
| PLAT754_ALERT_4_C Contact Calc | 2.68000, | Rep   | 2.684(7)  | ..... | Senseless s.u. |
| H(10)-C(7)                     | 1.555    | 1.555 | .....     | #     | 46 Check       |
| PLAT754_ALERT_4_C Contact Calc | 1.99000, | Rep   | 1.993(7)  | ..... | Senseless s.u. |
| H(10)-C(8)                     | 1.555    | 1.555 | .....     | #     | 46 Check       |
| PLAT754_ALERT_4_C Contact Calc | 3.33000, | Rep   | 3.328(7)  | ..... | Senseless s.u. |
| H(10)-C(9)                     | 1.555    | 1.555 | .....     | #     | 46 Check       |
| PLAT754_ALERT_4_C Contact Calc | 3.35000, | Rep   | 3.350(7)  | ..... | Senseless s.u. |

|                                |          |       |          |       |                |
|--------------------------------|----------|-------|----------|-------|----------------|
| H(10)-C(10)                    | 1.555    | 1.555 | .....    | #     | 46 Check       |
| PLAT754_ALERT_4_C Contact Calc | 3.19000, | Rep   | 3.185(9) | ..... | Senseless s.u. |
| H(10)-C(21)                    | 1.555    | 1.555 | .....    | #     | 46 Check       |
| PLAT754_ALERT_4_C Contact Calc | 3.08000, | Rep   | 3.082(7) | ..... | Senseless s.u. |
| H(10)-C(22)                    | 1.555    | 2.555 | .....    | #     | 46 Check       |
| PLAT754_ALERT_4_C Contact Calc | 2.34000, | Rep   | 2.342(7) | ..... | Senseless s.u. |
| H(10)-H(1)                     | 1.555    | 1.555 | .....    | #     | 46 Check       |
| PLAT754_ALERT_4_C Contact Calc | 3.20000, | Rep   | 3.201(7) | ..... | Senseless s.u. |
| H(10)-H(3)                     | 1.555    | 1.555 | .....    | #     | 46 Check       |
| PLAT754_ALERT_4_C Contact Calc | 2.52000, | Rep   | 2.515(7) | ..... | Senseless s.u. |
| H(10)-H(4)                     | 1.555    | 1.555 | .....    | #     | 46 Check       |
| PLAT754_ALERT_4_C Contact Calc | 2.34000, | Rep   | 2.344(6) | ..... | Senseless s.u. |
| H(10)-H(5)                     | 1.555    | 2.555 | .....    | #     | 46 Check       |
| PLAT754_ALERT_4_C Contact Calc | 3.47000, | Rep   | 3.469(7) | ..... | Senseless s.u. |
| H(10)-H(7)                     | 1.555    | 1.555 | .....    | #     | 46 Check       |
| PLAT754_ALERT_4_C Contact Calc | 3.42000, | Rep   | 3.422(7) | ..... | Senseless s.u. |
| H(10)-H(9)                     | 1.555    | 2.555 | .....    | #     | 46 Check       |
| PLAT754_ALERT_4_C Contact Calc | 3.17000, | Rep   | 3.168(8) | ..... | Senseless s.u. |
| H(10)-H(13)                    | 1.555    | 1.655 | .....    | #     | 46 Check       |
| PLAT754_ALERT_4_C Contact Calc | 2.86000, | Rep   | 2.861(6) | ..... | Senseless s.u. |
| H(11)-O(1)                     | 1.555    | 2.555 | .....    | #     | 46 Check       |
| PLAT754_ALERT_4_C Contact Calc | 2.89000, | Rep   | 2.886(7) | ..... | Senseless s.u. |
| H(11)-N(1)                     | 1.555    | 3.555 | .....    | #     | 46 Check       |
| PLAT754_ALERT_4_C Contact Calc | 2.64000, | Rep   | 2.637(7) | ..... | Senseless s.u. |
| H(11)-C(3)                     | 1.555    | 1.555 | .....    | #     | 46 Check       |
| PLAT754_ALERT_4_C Contact Calc | 3.32000, | Rep   | 3.318(7) | ..... | Senseless s.u. |
| H(11)-C(4)                     | 1.555    | 1.555 | .....    | #     | 46 Check       |
| PLAT754_ALERT_4_C Contact Calc | 3.27000, | Rep   | 3.271(7) | ..... | Senseless s.u. |
| H(11)-C(9)                     | 1.555    | 2.555 | .....    | #     | 46 Check       |
| PLAT754_ALERT_4_C Contact Calc | 3.25000, | Rep   | 3.251(7) | ..... | Senseless s.u. |
| H(11)-C(10)                    | 1.555    | 2.555 | .....    | #     | 46 Check       |
| PLAT754_ALERT_4_C Contact Calc | 2.03000, | Rep   | 2.028(7) | ..... | Senseless s.u. |
| H(11)-C(12)                    | 1.555    | 1.555 | .....    | #     | 46 Check       |
| PLAT754_ALERT_4_C Contact Calc | 2.04000, | Rep   | 2.037(9) | ..... | Senseless s.u. |
| H(11)-C(14)                    | 1.555    | 1.555 | .....    | #     | 46 Check       |
| PLAT754_ALERT_4_C Contact Calc | 3.23000, | Rep   | 3.230(9) | ..... | Senseless s.u. |
| H(11)-C(15)                    | 1.555    | 1.555 | .....    | #     | 46 Check       |
| PLAT754_ALERT_4_C Contact Calc | 3.24000, | Rep   | 3.235(7) | ..... | Senseless s.u. |
| H(11)-C(17)                    | 1.555    | 1.555 | .....    | #     | 46 Check       |
| PLAT754_ALERT_4_C Contact Calc | 3.39000, | Rep   | 3.393(7) | ..... | Senseless s.u. |
| H(11)-C(22)                    | 1.555    | 3.555 | .....    | #     | 46 Check       |
| PLAT754_ALERT_4_C Contact Calc | 2.35000, | Rep   | 2.350(7) | ..... | Senseless s.u. |
| H(11)-H(4)                     | 1.555    | 1.555 | .....    | #     | 46 Check       |
| PLAT754_ALERT_4_C Contact Calc | 3.42000, | Rep   | 3.423(8) | ..... | Senseless s.u. |
| H(11)-H(6)                     | 1.555    | 2.555 | .....    | #     | 46 Check       |
| PLAT754_ALERT_4_C Contact Calc | 2.93000, | Rep   | 2.932(7) | ..... | Senseless s.u. |
| H(11)-H(7)                     | 1.555    | 2.555 | .....    | #     | 46 Check       |
| PLAT754_ALERT_4_C Contact Calc | 2.78000, | Rep   | 2.783(7) | ..... | Senseless s.u. |
| H(11)-H(8)                     | 1.555    | 2.555 | .....    | #     | 46 Check       |
| PLAT754_ALERT_4_C Contact Calc | 3.59000, | Rep   | 3.591(7) | ..... | Senseless s.u. |
| H(11)-H(9)                     | 1.555    | 2.555 | .....    | #     | 46 Check       |
| PLAT754_ALERT_4_C Contact Calc | 2.34000, | Rep   | 2.336(9) | ..... | Senseless s.u. |
| H(11)-H(12)                    | 1.555    | 1.555 | .....    | #     | 46 Check       |
| PLAT754_ALERT_4_C Contact Calc | 3.15000, | Rep   | 3.155(8) | ..... | Senseless s.u. |
| H(12)-N(1)                     | 1.555    | 3.555 | .....    | #     | 46 Check       |
| PLAT754_ALERT_4_C Contact Calc | 3.26000, | Rep   | 3.261(8) | ..... | Senseless s.u. |
| H(12)-C(12)                    | 1.555    | 1.555 | .....    | #     | 46 Check       |
| PLAT754_ALERT_4_C Contact Calc | 2.03000, | Rep   | 2.034(8) | ..... | Senseless s.u. |
| H(12)-C(13)                    | 1.555    | 1.555 | .....    | #     | 46 Check       |
| PLAT754_ALERT_4_C Contact Calc | 2.00000, | Rep   | 1.997(9) | ..... | Senseless s.u. |
| H(12)-C(15)                    | 1.555    | 1.555 | .....    | #     | 46 Check       |
| PLAT754_ALERT_4_C Contact Calc | 3.20000, | Rep   | 3.196(9) | ..... | Senseless s.u. |

|                                |          |       |           |       |                |
|--------------------------------|----------|-------|-----------|-------|----------------|
| H(12)-C(16)                    | 1.555    | 1.555 | .....     | #     | 46 Check       |
| PLAT754_ALERT_4_C Contact Calc | 3.33000, | Rep   | 3.326(9)  | ..... | Senseless s.u. |
| H(12)-C(16)                    | 1.555    | 2.455 | .....     | #     | 46 Check       |
| PLAT754_ALERT_4_C Contact Calc | 3.40000, | Rep   | 3.403(8)  | ..... | Senseless s.u. |
| H(12)-C(17)                    | 1.555    | 2.455 | .....     | #     | 46 Check       |
| PLAT754_ALERT_4_C Contact Calc | 2.34000, | Rep   | 2.336(9)  | ..... | Senseless s.u. |
| H(12)-H(11)                    | 1.555    | 1.555 | .....     | #     | 46 Check       |
| PLAT754_ALERT_4_C Contact Calc | 2.30000, | Rep   | 2.298(9)  | ..... | Senseless s.u. |
| H(12)-H(13)                    | 1.555    | 1.555 | .....     | #     | 46 Check       |
| PLAT754_ALERT_4_C Contact Calc | 3.02000, | Rep   | 3.020(9)  | ..... | Senseless s.u. |
| H(12)-H(14)                    | 1.555    | 2.455 | .....     | #     | 46 Check       |
| PLAT754_ALERT_4_C Contact Calc | 3.17000, | Rep   | 3.172(8)  | ..... | Senseless s.u. |
| H(12)-H(15)                    | 1.555    | 2.455 | .....     | #     | 46 Check       |
| PLAT754_ALERT_4_C Contact Calc | 3.12000, | Rep   | 3.118(8)  | ..... | Senseless s.u. |
| H(13)-C(8)                     | 1.555    | 1.455 | .....     | #     | 46 Check       |
| PLAT754_ALERT_4_C Contact Calc | 3.49000, | Rep   | 3.488(9)  | ..... | Senseless s.u. |
| H(13)-C(10)                    | 1.555    | 1.455 | .....     | #     | 46 Check       |
| PLAT754_ALERT_4_C Contact Calc | 3.08000, | Rep   | 3.080(8)  | ..... | Senseless s.u. |
| H(13)-C(11)                    | 1.555    | 1.455 | .....     | #     | 46 Check       |
| PLAT754_ALERT_4_C Contact Calc | 3.24000, | Rep   | 3.237(9)  | ..... | Senseless s.u. |
| H(13)-C(13)                    | 1.555    | 1.555 | .....     | #     | 46 Check       |
| PLAT754_ALERT_4_C Contact Calc | 2.00000, | Rep   | 2.004(9)  | ..... | Senseless s.u. |
| H(13)-C(14)                    | 1.555    | 1.555 | .....     | #     | 46 Check       |
| PLAT754_ALERT_4_C Contact Calc | 2.00000, | Rep   | 1.996(10) | ..... | Senseless s.u. |
| H(13)-C(16)                    | 1.555    | 1.555 | .....     | #     | 46 Check       |
| PLAT754_ALERT_4_C Contact Calc | 3.22000, | Rep   | 3.219(9)  | ..... | Senseless s.u. |
| H(13)-C(17)                    | 1.555    | 1.555 | .....     | #     | 46 Check       |
| PLAT754_ALERT_4_C Contact Calc | 3.10000, | Rep   | 3.101(9)  | ..... | Senseless s.u. |
| H(13)-H(7)                     | 1.555    | 1.455 | .....     | #     | 46 Check       |
| PLAT754_ALERT_4_C Contact Calc | 2.96000, | Rep   | 2.964(9)  | ..... | Senseless s.u. |
| H(13)-H(8)                     | 1.555    | 1.455 | .....     | #     | 46 Check       |
| PLAT754_ALERT_4_C Contact Calc | 3.17000, | Rep   | 3.168(8)  | ..... | Senseless s.u. |
| H(13)-H(10)                    | 1.555    | 1.455 | .....     | #     | 46 Check       |
| PLAT754_ALERT_4_C Contact Calc | 2.30000, | Rep   | 2.298(9)  | ..... | Senseless s.u. |
| H(13)-H(12)                    | 1.555    | 1.555 | .....     | #     | 46 Check       |
| PLAT754_ALERT_4_C Contact Calc | 2.29000, | Rep   | 2.292(10) | ..... | Senseless s.u. |
| H(13)-H(14)                    | 1.555    | 1.555 | .....     | #     | 46 Check       |
| PLAT754_ALERT_4_C Contact Calc | 2.69000, | Rep   | 2.685(8)  | ..... | Senseless s.u. |
| H(14)-N(1)                     | 1.555    | 4.445 | .....     | #     | 46 Check       |
| PLAT754_ALERT_4_C Contact Calc | 3.51000, | Rep   | 3.511(8)  | ..... | Senseless s.u. |
| H(14)-C(1)                     | 1.555    | 3.556 | .....     | #     | 46 Check       |
| PLAT754_ALERT_4_C Contact Calc | 3.26000, | Rep   | 3.261(9)  | ..... | Senseless s.u. |
| H(14)-C(12)                    | 1.555    | 1.555 | .....     | #     | 46 Check       |
| PLAT754_ALERT_4_C Contact Calc | 3.20000, | Rep   | 3.198(9)  | ..... | Senseless s.u. |
| H(14)-C(14)                    | 1.555    | 1.555 | .....     | #     | 46 Check       |
| PLAT754_ALERT_4_C Contact Calc | 2.00000, | Rep   | 2.003(10) | ..... | Senseless s.u. |
| H(14)-C(15)                    | 1.555    | 1.555 | .....     | #     | 46 Check       |
| PLAT754_ALERT_4_C Contact Calc | 2.02000, | Rep   | 2.020(10) | ..... | Senseless s.u. |
| H(14)-C(17)                    | 1.555    | 1.555 | .....     | #     | 46 Check       |
| PLAT754_ALERT_4_C Contact Calc | 2.70000, | Rep   | 2.699(9)  | ..... | Senseless s.u. |
| H(14)-H(1)                     | 1.555    | 3.556 | .....     | #     | 46 Check       |
| PLAT754_ALERT_4_C Contact Calc | 3.24000, | Rep   | 3.239(8)  | ..... | Senseless s.u. |
| H(14)-H(3)                     | 1.555    | 3.556 | .....     | #     | 46 Check       |
| PLAT754_ALERT_4_C Contact Calc | 2.96000, | Rep   | 2.963(9)  | ..... | Senseless s.u. |
| H(14)-H(7)                     | 1.555    | 1.455 | .....     | #     | 46 Check       |
| PLAT754_ALERT_4_C Contact Calc | 3.50000, | Rep   | 3.500(9)  | ..... | Senseless s.u. |
| H(14)-H(8)                     | 1.555    | 1.455 | .....     | #     | 46 Check       |
| PLAT754_ALERT_4_C Contact Calc | 3.02000, | Rep   | 3.020(9)  | ..... | Senseless s.u. |
| H(14)-H(12)                    | 1.555    | 2.445 | .....     | #     | 46 Check       |
| PLAT754_ALERT_4_C Contact Calc | 2.29000, | Rep   | 2.292(10) | ..... | Senseless s.u. |
| H(14)-H(13)                    | 1.555    | 1.555 | .....     | #     | 46 Check       |
| PLAT754_ALERT_4_C Contact Calc | 2.32000, | Rep   | 2.321(10) | ..... | Senseless s.u. |

|                                |          |       |           |       |                |
|--------------------------------|----------|-------|-----------|-------|----------------|
| H(14)-H(15)                    | 1.555    | 1.555 | .....     | #     | 46 Check       |
| PLAT754_ALERT_4_C Contact Calc | 2.76000, | Rep   | 2.758(9)  | ..... | Senseless s.u. |
| H(15)-C(2)                     | 1.555    | 1.555 | .....     | #     | 46 Check       |
| PLAT754_ALERT_4_C Contact Calc | 2.74000, | Rep   | 2.739(8)  | ..... | Senseless s.u. |
| H(15)-C(3)                     | 1.555    | 1.555 | .....     | #     | 46 Check       |
| PLAT754_ALERT_4_C Contact Calc | 3.32000, | Rep   | 3.320(8)  | ..... | Senseless s.u. |
| H(15)-C(4)                     | 1.555    | 1.555 | .....     | #     | 46 Check       |
| PLAT754_ALERT_4_C Contact Calc | 2.03000, | Rep   | 2.028(7)  | ..... | Senseless s.u. |
| H(15)-C(12)                    | 1.555    | 1.555 | .....     | #     | 46 Check       |
| PLAT754_ALERT_4_C Contact Calc | 3.23000, | Rep   | 3.229(7)  | ..... | Senseless s.u. |
| H(15)-C(13)                    | 1.555    | 1.555 | .....     | #     | 46 Check       |
| PLAT754_ALERT_4_C Contact Calc | 3.22000, | Rep   | 3.221(9)  | ..... | Senseless s.u. |
| H(15)-C(15)                    | 1.555    | 1.555 | .....     | #     | 46 Check       |
| PLAT754_ALERT_4_C Contact Calc | 2.03000, | Rep   | 2.027(10) | ..... | Senseless s.u. |
| H(15)-C(16)                    | 1.555    | 1.555 | .....     | #     | 46 Check       |
| PLAT754_ALERT_4_C Contact Calc | 3.51000, | Rep   | 3.515(8)  | ..... | Senseless s.u. |
| H(15)-C(21)                    | 1.555    | 2.545 | .....     | #     | 46 Check       |
| PLAT754_ALERT_4_C Contact Calc | 2.34000, | Rep   | 2.335(9)  | ..... | Senseless s.u. |
| H(15)-H(2)                     | 1.555    | 1.555 | .....     | #     | 46 Check       |
| PLAT754_ALERT_4_C Contact Calc | 2.77000, | Rep   | 2.774(8)  | ..... | Senseless s.u. |
| H(15)-H(3)                     | 1.555    | 1.555 | .....     | #     | 46 Check       |
| PLAT754_ALERT_4_C Contact Calc | 3.03000, | Rep   | 3.032(8)  | ..... | Senseless s.u. |
| H(15)-H(3)                     | 1.555    | 3.556 | .....     | #     | 46 Check       |
| PLAT754_ALERT_4_C Contact Calc | 3.59000, | Rep   | 3.591(8)  | ..... | Senseless s.u. |
| H(15)-H(4)                     | 1.555    | 1.555 | .....     | #     | 46 Check       |
| PLAT754_ALERT_4_C Contact Calc | 2.99000, | Rep   | 2.994(8)  | ..... | Senseless s.u. |
| H(15)-H(5)                     | 1.555    | 1.555 | .....     | #     | 46 Check       |
| PLAT754_ALERT_4_C Contact Calc | 3.17000, | Rep   | 3.172(8)  | ..... | Senseless s.u. |
| H(15)-H(12)                    | 1.555    | 2.445 | .....     | #     | 46 Check       |
| PLAT754_ALERT_4_C Contact Calc | 2.32000, | Rep   | 2.321(10) | ..... | Senseless s.u. |
| H(15)-H(14)                    | 1.555    | 1.555 | .....     | #     | 46 Check       |

## ● Alert level G

CHEMS02\_ALERT\_1\_G Please check that you have entered the correct  
 \_publ\_requested\_category classification of your compound;  
 FI or CI or EI for inorganic; FM or CM or EM for metal-organic;  
 FO or CO or EO for organic.  
 From the CIF: \_publ\_requested\_category CHOOSE FI FM FO CI CM CO or  
 From the CIF: \_chemical\_formula\_sum:C22 H19 N1 O1

PLAT005\_ALERT\_5\_G No Embedded Refinement Details found in the CIF Please Do !  
 PLAT063\_ALERT\_4\_G Crystal Size Likely too Large for Beam Size .... 0.70 mm  
 PLAT200\_ALERT\_1\_G Reported \_diffrn\_ambient\_temperature .... (K) 293 Check  
 PLAT710\_ALERT\_4\_G Delete 1-2-3 or 2-3-4 Linear Torsion Angle ... # 21 Do !  
     C(4)-C(5)-C(22-N(1)) -145.00 12.00 1.555 1.555 1.555 1.555  
 PLAT710\_ALERT\_4\_G Delete 1-2-3 or 2-3-4 Linear Torsion Angle ... # 22 Do !  
     C(6)-C(5)-C(22-N(1)) 32.00 13.00 1.555 1.555 1.555 1.555  
 PLAT793\_ALERT\_4\_G The Model has Chirality at C1 (Centro SPGR) R Verify  
 PLAT793\_ALERT\_4\_G The Model has Chirality at C3 (Centro SPGR) S Verify  
 PLAT882\_ALERT\_1\_G Missing datum for \_diffrn\_reflns\_av\_unetI/netI ..... Please Check

- 
- 0 **ALERT level A** = Most likely a serious problem - resolve or explain  
 0 **ALERT level B** = A potentially serious problem, consider carefully  
 451 **ALERT level C** = Check. Ensure it is not caused by an omission or oversight  
 9 **ALERT level G** = General information/check it is not something unexpected
- 5 ALERT type 1 CIF construction/syntax error, inconsistent or missing data  
 6 ALERT type 2 Indicator that the structure model may be wrong or deficient  
 4 ALERT type 3 Indicator that the structure quality may be low  
 444 ALERT type 4 Improvement, methodology, query or suggestion  
 1 ALERT type 5 Informative message, check



---

---

It is advisable to attempt to resolve as many as possible of the alerts in all categories. Often the minor alerts point to easily fixed oversights, errors and omissions in your CIF or refinement strategy, so attention to these fine details can be worthwhile. In order to resolve some of the more serious problems it may be necessary to carry out additional measurements or structure refinements. However, the purpose of your study may justify the reported deviations and the more serious of these should normally be commented upon in the discussion or experimental section of a paper or in the "special\_details" fields of the CIF. checkCIF was carefully designed to identify outliers and unusual parameters, but every test has its limitations and alerts that are not important in a particular case may appear. Conversely, the absence of alerts does not guarantee there are no aspects of the results needing attention. It is up to the individual to critically assess their own results and, if necessary, seek expert advice.

### **Publication of your CIF in IUCr journals**

A basic structural check has been run on your CIF. These basic checks will be run on all CIFs submitted for publication in IUCr journals (*Acta Crystallographica*, *Journal of Applied Crystallography*, *Journal of Synchrotron Radiation*); however, if you intend to submit to *Acta Crystallographica Section C* or *E* or *IUCrData*, you should make sure that full publication checks are run on the final version of your CIF prior to submission.

### **Publication of your CIF in other journals**

Please refer to the *Notes for Authors* of the relevant journal for any special instructions relating to CIF submission.

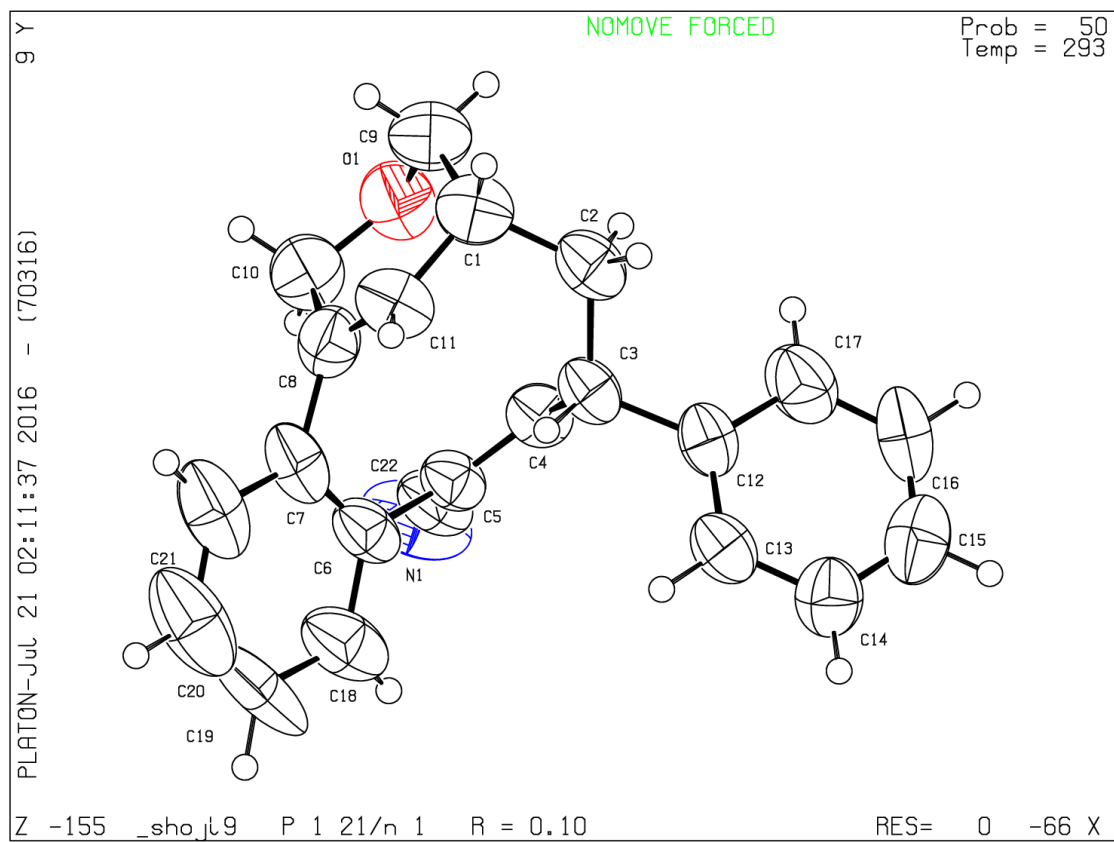

Supplement: Supplementary file 3 [file 5906367]
