# Supplementary material
Source: publisher figshare collection journal article supplement (https://acs.figshare.com/ndownloader/files/5906367)

# checkCIF/PLATON report

You have not supplied any structure factors. As a result the full set of tests cannot be run.

THIS REPORT IS FOR GUIDANCE ONLY. IF USED AS PART OF A REVIEW PROCEDURE FOR PUBLICATION, IT SHOULD NOT REPLACE THE EXPERTISE OF AN EXPERIENCED CRYSTALLOGRAPHIC REFEREE.

No syntax errors found.      CIF dictionary      Interpreting this report

## Datablock: \_shoji8

---

|                 |                                                   |                    |
|-----------------|---------------------------------------------------|--------------------|
| Bond precision: | C-C = 0.0035 A                                    | Wavelength=0.71075 |
| Cell:           | a=14.9288(10)      b=6.6208(6)      c=17.0406(12) |                    |
|                 | alpha=90      beta=104.5303(18)      gamma=90     |                    |
| Temperature:    | 293 K                                             |                    |
|                 | Calculated                                        | Reported           |
| Volume          | 1630.4(2)                                         | 1630.4(2)          |
| Space group     | P 21/c                                            | P 1 21/c 1         |
| Hall group      | -P 2ybc                                           | -P 2ybc            |
| Moiety formula  | C22 H19 N O                                       | C22 H19 N O        |
| Sum formula     | C22 H19 N O                                       | C22 H19 N O        |
| Mr              | 313.38                                            | 313.40             |
| Dx,g cm-3       | 1.277                                             | 1.277              |
| Z               | 4                                                 | 4                  |
| Mu (mm-1)       | 0.078                                             | 0.078              |
| F000            | 664.0                                             | 664.0              |
| F000'           | 664.26                                            |                    |
| h,k,lmax        | 19,8,22                                           | 19,8,22            |
| Nref            | 3720                                              | 3696               |
| Tmin,Tmax       | 0.925,0.977                                       |                    |
| Tmin'           | 0.925                                             |                    |

Correction method= Not given

Data completeness= 0.994      Theta(max)= 27.430

R(reflections)= 0.0632( 2385)      wR2(reflections)= wR= 0.0832( 2385)

S = 1.284      Npar= 236

---

The following ALERTS were generated. Each ALERT has the format

**test-name\_ALERT\_alert-type\_alert-level.**

Click on the hyperlinks for more details of the test.

---

## Alert level B

CRYSS02\_ALERT\_3\_B The value of \_exptl\_crystal\_size\_mid is > 0.8

Mid crystal size given = 1.000

---

## Alert level C

DIFMN02\_ALERT\_2\_C The minimum difference density is < -0.1\*ZMAX\*0.75

\_refine\_diff\_density\_min given = -0.670

Test value = -0.600

DIFMN03\_ALERT\_1\_C The minimum difference density is < -0.1\*ZMAX\*0.75

The relevant atom site should be identified.

DIFMX01\_ALERT\_2\_C The maximum difference density is > 0.1\*ZMAX\*0.75

\_refine\_diff\_density\_max given = 0.780

Test value = 0.600

DIFMX02\_ALERT\_1\_C The maximum difference density is > 0.1\*ZMAX\*0.75

The relevant atom site should be identified.

PLAT097\_ALERT\_2\_C Large Reported Max. (Positive) Residual Density 0.78 eA-3

PLAT098\_ALERT\_2\_C Large Reported Min. (Negative) Residual Density -0.67 eA-3

PLAT193\_ALERT\_1\_C Cell and Diffraction Temperatures Differ by .... 3 Degree

PLAT751\_ALERT\_4\_C Bond Calc 0.95000, Rep 0.950(3) ..... Senseless s.u.

C(2) -H(1) 1.555 1.555 ..... # 29 Check

PLAT751\_ALERT\_4\_C Bond Calc 0.95000, Rep 0.950(3) ..... Senseless s.u.

C(3) -H(2) 1.555 1.555 ..... # 30 Check

PLAT751\_ALERT\_4\_C Bond Calc 0.95000, Rep 0.950(3) ..... Senseless s.u.

C(5) -H(3) 1.555 1.555 ..... # 31 Check

PLAT751\_ALERT\_4\_C Bond Calc 0.95000, Rep 0.950(3) ..... Senseless s.u.

C(6) -H(4) 1.555 1.555 ..... # 32 Check

PLAT751\_ALERT\_4\_C Bond Calc 0.95000, Rep 0.950(4) ..... Senseless s.u.

C(7) -H(5) 1.555 1.555 ..... # 33 Check

PLAT751\_ALERT\_4\_C Bond Calc 0.95000, Rep 0.950(3) ..... Senseless s.u.

C(8) -H(6) 1.555 1.555 ..... # 34 Check

PLAT751\_ALERT\_4\_C Bond Calc 0.95000, Rep 0.950(3) ..... Senseless s.u.

C(12) -H(7) 1.555 1.555 ..... # 35 Check

PLAT751\_ALERT\_4\_C Bond Calc 0.95000, Rep 0.950(4) ..... Senseless s.u.

C(12) -H(8) 1.555 1.555 ..... # 36 Check

PLAT751\_ALERT\_4\_C Bond Calc 0.95000, Rep 0.950(4) ..... Senseless s.u.

C(13) -H(9) 1.555 1.555 ..... # 37 Check

PLAT751\_ALERT\_4\_C Bond Calc 0.95000, Rep 0.950(4) ..... Senseless s.u.

C(13) -H(10) 1.555 1.555 ..... # 38 Check

PLAT751\_ALERT\_4\_C Bond Calc 0.95000, Rep 0.950(3) ..... Senseless s.u.

C(14) -H(11) 1.555 1.555 ..... # 39 Check

PLAT751\_ALERT\_4\_C Bond Calc 0.95000, Rep 0.950(3) ..... Senseless s.u.

C(15) -H(12) 1.555 1.555 ..... # 40 Check

PLAT751\_ALERT\_4\_C Bond Calc 0.95000, Rep 0.950(3) ..... Senseless s.u.

C(15) -H(13) 1.555 1.555 ..... # 41 Check

PLAT751\_ALERT\_4\_C Bond Calc 0.95000, Rep 0.950(3) ..... Senseless s.u.

C(16) -H(14) 1.555 1.555 ..... # 42 Check

PLAT752\_ALERT\_4\_C Angle Calc 120.00, Rep 120.2(3) ..... Senseless s.u.

C(1) -C(2) -H(1) 1.555 1.555 1.555 .... # 44 Check

PLAT752\_ALERT\_4\_C Angle Calc 121.00, Rep 120.8(3) ..... Senseless s.u.

C(3) -C(2) -H(1) 1.555 1.555 1.555 .... # 45 Check

PLAT752\_ALERT\_4\_C Angle Calc 121.00, Rep 121.1(3) ..... Senseless s.u.

C(2) -C(3) -H(2) 1.555 1.555 1.555 .... # 46 Check

PLAT752\_ALERT\_4\_C Angle Calc 120.00, Rep 120.4(2) ..... Senseless s.u.

C(4) -C(3) -H(2) 1.555 1.555 1.555 .... # 47 Check

PLAT752\_ALERT\_4\_C Angle Calc 120.00, Rep 120.2(2) ..... Senseless s.u.

C(6) -C(5) -H(3) 1.555 1.555 1.555 .... # 48 Check

PLAT752\_ALERT\_4\_C Angle Calc 119.00, Rep 119.2(3) ..... Senseless s.u.

C(10) -C(5) -H(3) 1.555 1.555 1.555 .... # 49 Check

PLAT752\_ALERT\_4\_C Angle Calc 120.00, Rep 119.7(3) ..... Senseless s.u.

C(5) -C(6) -H(4) 1.555 1.555 1.555 .... # 50 Check

|                                |                   |                |                |
|--------------------------------|-------------------|----------------|----------------|
| PLAT752_ALERT_4_C Angle Calc   | 120.00, Rep       | 120.2(3) ..... | Senseless s.u. |
| C(7) -C(6) -H(4)               | 1.555 1.555       | 1.555 ....     | # 51 Check     |
| PLAT752_ALERT_4_C Angle Calc   | 120.00, Rep       | 120.0(3) ..... | Senseless s.u. |
| C(6) -C(7) -H(5)               | 1.555 1.555       | 1.555 ....     | # 52 Check     |
| PLAT752_ALERT_4_C Angle Calc   | 119.00, Rep       | 119.5(2) ..... | Senseless s.u. |
| C(8) -C(7) -H(5)               | 1.555 1.555       | 1.555 ....     | # 53 Check     |
| PLAT752_ALERT_4_C Angle Calc   | 121.00, Rep       | 120.7(3) ..... | Senseless s.u. |
| C(7) -C(8) -H(6)               | 1.555 1.555       | 1.555 ....     | # 54 Check     |
| PLAT752_ALERT_4_C Angle Calc   | 119.00, Rep       | 119.5(2) ..... | Senseless s.u. |
| C(9) -C(8) -H(6)               | 1.555 1.555       | 1.555 ....     | # 55 Check     |
| PLAT752_ALERT_4_C Angle Calc   | 110.00, Rep       | 110.1(3) ..... | Senseless s.u. |
| O(1) -C(12) -H(7)              | 1.555 1.555       | 1.555 ....     | # 56 Check     |
| PLAT752_ALERT_4_C Angle Calc   | 111.00, Rep       | 111.1(3) ..... | Senseless s.u. |
| O(1) -C(12) -H(8)              | 1.555 1.555       | 1.555 ....     | # 57 Check     |
| PLAT752_ALERT_4_C Angle Calc   | 110.00, Rep       | 110.0(2) ..... | Senseless s.u. |
| C(4) -C(12) -H(7)              | 1.555 1.555       | 1.555 ....     | # 58 Check     |
| PLAT752_ALERT_4_C Angle Calc   | 111.00, Rep       | 110.7(2) ..... | Senseless s.u. |
| C(4) -C(12) -H(8)              | 1.555 1.555       | 1.555 ....     | # 59 Check     |
| PLAT752_ALERT_4_C Angle Calc   | 109.00, Rep       | 109.5(3) ..... | Senseless s.u. |
| H(7) -C(12) -H(8)              | 1.555 1.555       | 1.555 ....     | # 60 Check     |
| PLAT752_ALERT_4_C Angle Calc   | 110.00, Rep       | 110.2(2) ..... | Senseless s.u. |
| O(1) -C(13) -H(9)              | 1.555 1.555       | 1.555 ....     | # 61 Check     |
| PLAT752_ALERT_4_C Angle Calc   | 110.00, Rep       | 109.6(2) ..... | Senseless s.u. |
| O(1) -C(13) -H(10)             | 1.555 1.555       | 1.555 ....     | # 62 Check     |
| PLAT752_ALERT_4_C Angle Calc   | 111.00, Rep       | 110.6(3) ..... | Senseless s.u. |
| C(14) -C(13) -H(9)             | 1.555 1.555       | 1.555 ....     | # 63 Check     |
| PLAT752_ALERT_4_C Angle Calc   | 109.00, Rep       | 109.0(2) ..... | Senseless s.u. |
| C(14) -C(13) -H(10)            | 1.555 1.555       | 1.555 ....     | # 64 Check     |
| PLAT752_ALERT_4_C Angle Calc   | 109.00, Rep       | 109.5(3) ..... | Senseless s.u. |
| H(9) -C(13) -H(10)             | 1.555 1.555       | 1.555 ....     | # 65 Check     |
| PLAT752_ALERT_4_C Angle Calc   | 108.00, Rep       | 108.5(2) ..... | Senseless s.u. |
| C(4) -C(14) -H(11)             | 1.555 1.555       | 1.555 ....     | # 66 Check     |
| PLAT752_ALERT_4_C Angle Calc   | 109.00, Rep       | 108.7(2) ..... | Senseless s.u. |
| C(13) -C(14) -H(11)            | 1.555 1.555       | 1.555 ....     | # 67 Check     |
| PLAT752_ALERT_4_C Angle Calc   | 108.00, Rep       | 108.2(2) ..... | Senseless s.u. |
| C(15) -C(14) -H(11)            | 1.555 1.555       | 1.555 ....     | # 68 Check     |
| PLAT752_ALERT_4_C Angle Calc   | 108.00, Rep       | 108.1(2) ..... | Senseless s.u. |
| C(14) -C(15) -H(12)            | 1.555 1.555       | 1.555 ....     | # 69 Check     |
| PLAT752_ALERT_4_C Angle Calc   | 106.00, Rep       | 106.3(2) ..... | Senseless s.u. |
| C(14) -C(15) -H(13)            | 1.555 1.555       | 1.555 ....     | # 70 Check     |
| PLAT752_ALERT_4_C Angle Calc   | 108.00, Rep       | 108.1(2) ..... | Senseless s.u. |
| C(16) -C(15) -H(12)            | 1.555 1.555       | 1.555 ....     | # 71 Check     |
| PLAT752_ALERT_4_C Angle Calc   | 106.00, Rep       | 106.1(2) ..... | Senseless s.u. |
| C(16) -C(15) -H(13)            | 1.555 1.555       | 1.555 ....     | # 72 Check     |
| PLAT752_ALERT_4_C Angle Calc   | 109.00, Rep       | 109.5(3) ..... | Senseless s.u. |
| H(12) -C(15) -H(13)            | 1.555 1.555       | 1.555 ....     | # 73 Check     |
| PLAT752_ALERT_4_C Angle Calc   | 107.00, Rep       | 107.1(2) ..... | Senseless s.u. |
| C(1) -C(16) -H(14)             | 1.555 1.555       | 1.555 ....     | # 74 Check     |
| PLAT752_ALERT_4_C Angle Calc   | 106.00, Rep       | 106.4(2) ..... | Senseless s.u. |
| C(15) -C(16) -H(14)            | 1.555 1.555       | 1.555 ....     | # 75 Check     |
| PLAT752_ALERT_4_C Angle Calc   | 107.00, Rep       | 107.1(2) ..... | Senseless s.u. |
| C(17) -C(16) -H(14)            | 1.555 1.555       | 1.555 ....     | # 76 Check     |
| PLAT754_ALERT_4_C Contact Calc | 3.35000, Rep      | 3.353(3) ..... | Senseless s.u. |
| O(1) -H(2)                     | 1.555 1.565 ..... | #              | 47 Check       |
| PLAT754_ALERT_4_C Contact Calc | 2.64000, Rep      | 2.639(3) ..... | Senseless s.u. |
| O(1) -H(3)                     | 1.555 1.555 ..... | #              | 47 Check       |
| PLAT754_ALERT_4_C Contact Calc | 2.56000, Rep      | 2.565(3) ..... | Senseless s.u. |
| O(1) -H(4)                     | 1.555 3.767 ..... | #              | 47 Check       |
| PLAT754_ALERT_4_C Contact Calc | 3.26000, Rep      | 3.256(2) ..... | Senseless s.u. |
| O(1) -H(5)                     | 1.555 4.555 ..... | #              | 47 Check       |
| PLAT754_ALERT_4_C Contact Calc | 2.37000, Rep      | 2.367(3) ..... | Senseless s.u. |
| O(1) -H(6)                     | 1.555 4.555 ..... | #              | 47 Check       |

|                                |              |          |       |                |
|--------------------------------|--------------|----------|-------|----------------|
| PLAT754_ALERT_4_C Contact Calc | 1.97000, Rep | 1.969(3) | ..... | Senseless s.u. |
| O(1) -H(7)                     | 1.555        | 1.555    | ..... | # 47 Check     |
| PLAT754_ALERT_4_C Contact Calc | 1.98000, Rep | 1.980(3) | ..... | Senseless s.u. |
| O(1) -H(8)                     | 1.555        | 1.555    | ..... | # 47 Check     |
| PLAT754_ALERT_4_C Contact Calc | 1.96000, Rep | 1.961(3) | ..... | Senseless s.u. |
| O(1) -H(9)                     | 1.555        | 1.555    | ..... | # 47 Check     |
| PLAT754_ALERT_4_C Contact Calc | 1.95000, Rep | 1.954(2) | ..... | Senseless s.u. |
| O(1) -H(10)                    | 1.555        | 1.555    | ..... | # 47 Check     |
| PLAT754_ALERT_4_C Contact Calc | 2.84000, Rep | 2.836(2) | ..... | Senseless s.u. |
| O(1) -H(11)                    | 1.555        | 1.555    | ..... | # 47 Check     |
| PLAT754_ALERT_4_C Contact Calc | 3.29000, Rep | 3.286(4) | ..... | Senseless s.u. |
| N(1) -H(1)                     | 1.555        | 1.555    | ..... | # 47 Check     |
| PLAT754_ALERT_4_C Contact Calc | 2.94000, Rep | 2.942(3) | ..... | Senseless s.u. |
| N(1) -H(6)                     | 1.555        | 1.555    | ..... | # 47 Check     |
| PLAT754_ALERT_4_C Contact Calc | 2.90000, Rep | 2.900(4) | ..... | Senseless s.u. |
| N(1) -H(8)                     | 1.555        | 4.544    | ..... | # 47 Check     |
| PLAT754_ALERT_4_C Contact Calc | 3.35000, Rep | 3.351(4) | ..... | Senseless s.u. |
| N(1) -H(9)                     | 1.555        | 4.554    | ..... | # 47 Check     |
| PLAT754_ALERT_4_C Contact Calc | 3.50000, Rep | 3.500(3) | ..... | Senseless s.u. |
| N(1) -H(10)                    | 1.555        | 4.554    | ..... | # 47 Check     |
| PLAT754_ALERT_4_C Contact Calc | 3.43000, Rep | 3.426(3) | ..... | Senseless s.u. |
| N(1) -H(11)                    | 1.555        | 4.544    | ..... | # 47 Check     |
| PLAT754_ALERT_4_C Contact Calc | 2.16000, Rep | 2.160(3) | ..... | Senseless s.u. |
| C(1) -H(1)                     | 1.555        | 1.555    | ..... | # 47 Check     |
| PLAT754_ALERT_4_C Contact Calc | 3.33000, Rep | 3.330(3) | ..... | Senseless s.u. |
| C(1) -H(2)                     | 1.555        | 1.555    | ..... | # 47 Check     |
| PLAT754_ALERT_4_C Contact Calc | 2.73000, Rep | 2.732(3) | ..... | Senseless s.u. |
| C(1) -H(6)                     | 1.555        | 1.555    | ..... | # 47 Check     |
| PLAT754_ALERT_4_C Contact Calc | 3.48000, Rep | 3.484(3) | ..... | Senseless s.u. |
| C(1) -H(11)                    | 1.555        | 1.555    | ..... | # 47 Check     |
| PLAT754_ALERT_4_C Contact Calc | 3.40000, Rep | 3.397(3) | ..... | Senseless s.u. |
| C(1) -H(12)                    | 1.555        | 1.555    | ..... | # 47 Check     |
| PLAT754_ALERT_4_C Contact Calc | 2.82000, Rep | 2.815(3) | ..... | Senseless s.u. |
| C(1) -H(13)                    | 1.555        | 1.555    | ..... | # 47 Check     |
| PLAT754_ALERT_4_C Contact Calc | 2.07000, Rep | 2.075(3) | ..... | Senseless s.u. |
| C(1) -H(14)                    | 1.555        | 1.555    | ..... | # 47 Check     |
| PLAT754_ALERT_4_C Contact Calc | 1.99000, Rep | 1.987(3) | ..... | Senseless s.u. |
| C(2) -H(2)                     | 1.555        | 1.555    | ..... | # 47 Check     |
| PLAT754_ALERT_4_C Contact Calc | 3.42000, Rep | 3.420(4) | ..... | Senseless s.u. |
| C(2) -H(10)                    | 1.555        | 1.545    | ..... | # 47 Check     |
| PLAT754_ALERT_4_C Contact Calc | 3.17000, Rep | 3.170(4) | ..... | Senseless s.u. |
| C(2) -H(11)                    | 1.555        | 1.555    | ..... | # 47 Check     |
| PLAT754_ALERT_4_C Contact Calc | 3.48000, Rep | 3.477(3) | ..... | Senseless s.u. |
| C(2) -H(13)                    | 1.555        | 1.545    | ..... | # 47 Check     |
| PLAT754_ALERT_4_C Contact Calc | 2.51000, Rep | 2.514(3) | ..... | Senseless s.u. |
| C(2) -H(14)                    | 1.555        | 1.555    | ..... | # 47 Check     |
| PLAT754_ALERT_4_C Contact Calc | 1.98000, Rep | 1.984(3) | ..... | Senseless s.u. |
| C(3) -H(1)                     | 1.555        | 1.555    | ..... | # 47 Check     |
| PLAT754_ALERT_4_C Contact Calc | 3.26000, Rep | 3.258(3) | ..... | Senseless s.u. |
| C(3) -H(3)                     | 1.555        | 3.757    | ..... | # 47 Check     |
| PLAT754_ALERT_4_C Contact Calc | 2.94000, Rep | 2.938(3) | ..... | Senseless s.u. |
| C(3) -H(7)                     | 1.555        | 1.555    | ..... | # 47 Check     |
| PLAT754_ALERT_4_C Contact Calc | 3.36000, Rep | 3.361(3) | ..... | Senseless s.u. |
| C(3) -H(7)                     | 1.555        | 3.757    | ..... | # 47 Check     |
| PLAT754_ALERT_4_C Contact Calc | 2.63000, Rep | 2.627(3) | ..... | Senseless s.u. |
| C(3) -H(8)                     | 1.555        | 1.555    | ..... | # 47 Check     |
| PLAT754_ALERT_4_C Contact Calc | 3.15000, Rep | 3.152(4) | ..... | Senseless s.u. |
| C(3) -H(10)                    | 1.555        | 1.545    | ..... | # 47 Check     |
| PLAT754_ALERT_4_C Contact Calc | 2.53000, Rep | 2.529(3) | ..... | Senseless s.u. |
| C(3) -H(11)                    | 1.555        | 1.555    | ..... | # 47 Check     |
| PLAT754_ALERT_4_C Contact Calc | 3.17000, Rep | 3.176(2) | ..... | Senseless s.u. |
| C(3) -H(14)                    | 1.555        | 1.555    | ..... | # 47 Check     |

|                                |              |          |       |                |
|--------------------------------|--------------|----------|-------|----------------|
| PLAT754_ALERT_4_C Contact Calc | 3.30000, Rep | 3.305(3) | ..... | Senseless s.u. |
| C(4) -H(1)                     | 1.555        | 1.555    | ..... | # 47 Check     |
| PLAT754_ALERT_4_C Contact Calc | 2.14000, Rep | 2.144(3) | ..... | Senseless s.u. |
| C(4) -H(2)                     | 1.555        | 1.555    | ..... | # 47 Check     |
| PLAT754_ALERT_4_C Contact Calc | 2.75000, Rep | 2.746(3) | ..... | Senseless s.u. |
| C(4) -H(3)                     | 1.555        | 1.555    | ..... | # 47 Check     |
| PLAT754_ALERT_4_C Contact Calc | 2.05000, Rep | 2.053(2) | ..... | Senseless s.u. |
| C(4) -H(7)                     | 1.555        | 1.555    | ..... | # 47 Check     |
| PLAT754_ALERT_4_C Contact Calc | 3.40000, Rep | 3.397(3) | ..... | Senseless s.u. |
| C(4) -H(7)                     | 1.555        | 3.757    | ..... | # 47 Check     |
| PLAT754_ALERT_4_C Contact Calc | 2.06000, Rep | 2.061(3) | ..... | Senseless s.u. |
| C(4) -H(8)                     | 1.555        | 1.555    | ..... | # 47 Check     |
| PLAT754_ALERT_4_C Contact Calc | 3.16000, Rep | 3.158(3) | ..... | Senseless s.u. |
| C(4) -H(9)                     | 1.555        | 1.555    | ..... | # 47 Check     |
| PLAT754_ALERT_4_C Contact Calc | 2.89000, Rep | 2.885(3) | ..... | Senseless s.u. |
| C(4) -H(10)                    | 1.555        | 1.555    | ..... | # 47 Check     |
| PLAT754_ALERT_4_C Contact Calc | 2.07000, Rep | 2.068(3) | ..... | Senseless s.u. |
| C(4) -H(11)                    | 1.555        | 1.555    | ..... | # 47 Check     |
| PLAT754_ALERT_4_C Contact Calc | 3.39000, Rep | 3.394(3) | ..... | Senseless s.u. |
| C(4) -H(12)                    | 1.555        | 1.555    | ..... | # 47 Check     |
| PLAT754_ALERT_4_C Contact Calc | 2.83000, Rep | 2.827(3) | ..... | Senseless s.u. |
| C(4) -H(13)                    | 1.555        | 1.555    | ..... | # 47 Check     |
| PLAT754_ALERT_4_C Contact Calc | 3.46000, Rep | 3.465(2) | ..... | Senseless s.u. |
| C(4) -H(14)                    | 1.555        | 1.555    | ..... | # 47 Check     |
| PLAT754_ALERT_4_C Contact Calc | 3.16000, Rep | 3.155(3) | ..... | Senseless s.u. |
| C(5) -H(1)                     | 1.555        | 1.565    | ..... | # 47 Check     |
| PLAT754_ALERT_4_C Contact Calc | 3.27000, Rep | 3.273(3) | ..... | Senseless s.u. |
| C(5) -H(2)                     | 1.555        | 1.565    | ..... | # 47 Check     |
| PLAT754_ALERT_4_C Contact Calc | 3.20000, Rep | 3.199(3) | ..... | Senseless s.u. |
| C(5) -H(2)                     | 1.555        | 3.757    | ..... | # 47 Check     |
| PLAT754_ALERT_4_C Contact Calc | 3.15000, Rep | 3.154(3) | ..... | Senseless s.u. |
| C(5) -H(3)                     | 1.555        | 3.767    | ..... | # 47 Check     |
| PLAT754_ALERT_4_C Contact Calc | 2.03000, Rep | 2.031(3) | ..... | Senseless s.u. |
| C(5) -H(4)                     | 1.555        | 1.555    | ..... | # 47 Check     |
| PLAT754_ALERT_4_C Contact Calc | 3.25000, Rep | 3.249(3) | ..... | Senseless s.u. |
| C(5) -H(5)                     | 1.555        | 1.555    | ..... | # 47 Check     |
| PLAT754_ALERT_4_C Contact Calc | 2.69000, Rep | 2.689(3) | ..... | Senseless s.u. |
| C(5) -H(7)                     | 1.555        | 1.555    | ..... | # 47 Check     |
| PLAT754_ALERT_4_C Contact Calc | 3.00000, Rep | 2.998(3) | ..... | Senseless s.u. |
| C(5) -H(7)                     | 1.555        | 3.757    | ..... | # 47 Check     |
| PLAT754_ALERT_4_C Contact Calc | 3.34000, Rep | 3.345(3) | ..... | Senseless s.u. |
| C(5) -H(8)                     | 1.555        | 3.757    | ..... | # 47 Check     |
| PLAT754_ALERT_4_C Contact Calc | 3.39000, Rep | 3.394(3) | ..... | Senseless s.u. |
| C(5) -H(10)                    | 1.555        | 1.555    | ..... | # 47 Check     |
| PLAT754_ALERT_4_C Contact Calc | 3.44000, Rep | 3.441(3) | ..... | Senseless s.u. |
| C(5) -H(13)                    | 1.555        | 1.555    | ..... | # 47 Check     |
| PLAT754_ALERT_4_C Contact Calc | 3.08000, Rep | 3.085(3) | ..... | Senseless s.u. |
| C(6) -H(1)                     | 1.555        | 1.565    | ..... | # 47 Check     |
| PLAT754_ALERT_4_C Contact Calc | 3.39000, Rep | 3.391(3) | ..... | Senseless s.u. |
| C(6) -H(2)                     | 1.555        | 3.757    | ..... | # 47 Check     |
| PLAT754_ALERT_4_C Contact Calc | 2.03000, Rep | 2.035(3) | ..... | Senseless s.u. |
| C(6) -H(3)                     | 1.555        | 1.555    | ..... | # 47 Check     |
| PLAT754_ALERT_4_C Contact Calc | 3.26000, Rep | 3.264(3) | ..... | Senseless s.u. |
| C(6) -H(3)                     | 1.555        | 3.767    | ..... | # 47 Check     |
| PLAT754_ALERT_4_C Contact Calc | 2.03000, Rep | 2.025(3) | ..... | Senseless s.u. |
| C(6) -H(5)                     | 1.555        | 1.555    | ..... | # 47 Check     |
| PLAT754_ALERT_4_C Contact Calc | 3.26000, Rep | 3.256(3) | ..... | Senseless s.u. |
| C(6) -H(6)                     | 1.555        | 1.555    | ..... | # 47 Check     |
| PLAT754_ALERT_4_C Contact Calc | 3.53000, Rep | 3.533(3) | ..... | Senseless s.u. |
| C(6) -H(6)                     | 1.555        | 2.756    | ..... | # 47 Check     |
| PLAT754_ALERT_4_C Contact Calc | 3.54000, Rep | 3.542(3) | ..... | Senseless s.u. |
| C(6) -H(7)                     | 1.555        | 3.757    | ..... | # 47 Check     |

|                                |              |          |       |                |
|--------------------------------|--------------|----------|-------|----------------|
| PLAT754_ALERT_4_C Contact Calc | 3.31000, Rep | 3.312(3) | ..... | Senseless s.u. |
| C(6) -H(8)                     | 1.555        | 3.757    | ..... | # 47 Check     |
| PLAT754_ALERT_4_C Contact Calc | 3.29000, Rep | 3.287(4) | ..... | Senseless s.u. |
| C(7) -H(1)                     | 1.555        | 1.565    | ..... | # 47 Check     |
| PLAT754_ALERT_4_C Contact Calc | 3.25000, Rep | 3.248(3) | ..... | Senseless s.u. |
| C(7) -H(3)                     | 1.555        | 1.555    | ..... | # 47 Check     |
| PLAT754_ALERT_4_C Contact Calc | 2.03000, Rep | 2.026(3) | ..... | Senseless s.u. |
| C(7) -H(4)                     | 1.555        | 1.555    | ..... | # 47 Check     |
| PLAT754_ALERT_4_C Contact Calc | 3.25000, Rep | 3.252(4) | ..... | Senseless s.u. |
| C(7) -H(5)                     | 1.555        | 2.746    | ..... | # 47 Check     |
| PLAT754_ALERT_4_C Contact Calc | 2.04000, Rep | 2.042(3) | ..... | Senseless s.u. |
| C(7) -H(6)                     | 1.555        | 1.555    | ..... | # 47 Check     |
| PLAT754_ALERT_4_C Contact Calc | 3.52000, Rep | 3.521(3) | ..... | Senseless s.u. |
| C(7) -H(8)                     | 1.555        | 4.554    | ..... | # 47 Check     |
| PLAT754_ALERT_4_C Contact Calc | 3.55000, Rep | 3.546(3) | ..... | Senseless s.u. |
| C(8) -H(1)                     | 1.555        | 1.565    | ..... | # 47 Check     |
| PLAT754_ALERT_4_C Contact Calc | 3.26000, Rep | 3.255(3) | ..... | Senseless s.u. |
| C(8) -H(4)                     | 1.555        | 1.555    | ..... | # 47 Check     |
| PLAT754_ALERT_4_C Contact Calc | 3.35000, Rep | 3.347(3) | ..... | Senseless s.u. |
| C(8) -H(4)                     | 1.555        | 2.746    | ..... | # 47 Check     |
| PLAT754_ALERT_4_C Contact Calc | 2.03000, Rep | 2.031(3) | ..... | Senseless s.u. |
| C(8) -H(5)                     | 1.555        | 1.555    | ..... | # 47 Check     |
| PLAT754_ALERT_4_C Contact Calc | 3.06000, Rep | 3.060(3) | ..... | Senseless s.u. |
| C(8) -H(5)                     | 1.555        | 2.746    | ..... | # 47 Check     |
| PLAT754_ALERT_4_C Contact Calc | 3.47000, Rep | 3.471(3) | ..... | Senseless s.u. |
| C(8) -H(13)                    | 1.555        | 1.555    | ..... | # 47 Check     |
| PLAT754_ALERT_4_C Contact Calc | 3.25000, Rep | 3.252(3) | ..... | Senseless s.u. |
| C(9) -H(1)                     | 1.555        | 1.555    | ..... | # 47 Check     |
| PLAT754_ALERT_4_C Contact Calc | 3.26000, Rep | 3.261(3) | ..... | Senseless s.u. |
| C(9) -H(3)                     | 1.555        | 1.555    | ..... | # 47 Check     |
| PLAT754_ALERT_4_C Contact Calc | 3.26000, Rep | 3.261(3) | ..... | Senseless s.u. |
| C(9) -H(5)                     | 1.555        | 1.555    | ..... | # 47 Check     |
| PLAT754_ALERT_4_C Contact Calc | 3.52000, Rep | 3.521(3) | ..... | Senseless s.u. |
| C(9) -H(5)                     | 1.555        | 2.746    | ..... | # 47 Check     |
| PLAT754_ALERT_4_C Contact Calc | 2.04000, Rep | 2.037(3) | ..... | Senseless s.u. |
| C(9) -H(6)                     | 1.555        | 1.555    | ..... | # 47 Check     |
| PLAT754_ALERT_4_C Contact Calc | 3.59000, Rep | 3.587(3) | ..... | Senseless s.u. |
| C(9) -H(7)                     | 1.555        | 3.757    | ..... | # 47 Check     |
| PLAT754_ALERT_4_C Contact Calc | 2.64000, Rep | 2.641(3) | ..... | Senseless s.u. |
| C(9) -H(13)                    | 1.555        | 1.555    | ..... | # 47 Check     |
| PLAT754_ALERT_4_C Contact Calc | 3.31000, Rep | 3.314(3) | ..... | Senseless s.u. |
| C(9) -H(14)                    | 1.555        | 1.555    | ..... | # 47 Check     |
| PLAT754_ALERT_4_C Contact Calc | 3.45000, Rep | 3.450(3) | ..... | Senseless s.u. |
| C(10)-H(1)                     | 1.555        | 1.565    | ..... | # 47 Check     |
| PLAT754_ALERT_4_C Contact Calc | 3.24000, Rep | 3.244(3) | ..... | Senseless s.u. |
| C(10)-H(2)                     | 1.555        | 1.555    | ..... | # 47 Check     |
| PLAT754_ALERT_4_C Contact Calc | 2.03000, Rep | 2.031(3) | ..... | Senseless s.u. |
| C(10)-H(3)                     | 1.555        | 1.555    | ..... | # 47 Check     |
| PLAT754_ALERT_4_C Contact Calc | 3.26000, Rep | 3.264(3) | ..... | Senseless s.u. |
| C(10)-H(4)                     | 1.555        | 1.555    | ..... | # 47 Check     |
| PLAT754_ALERT_4_C Contact Calc | 3.27000, Rep | 3.274(3) | ..... | Senseless s.u. |
| C(10)-H(6)                     | 1.555        | 1.555    | ..... | # 47 Check     |
| PLAT754_ALERT_4_C Contact Calc | 2.65000, Rep | 2.649(3) | ..... | Senseless s.u. |
| C(10)-H(7)                     | 1.555        | 1.555    | ..... | # 47 Check     |
| PLAT754_ALERT_4_C Contact Calc | 3.01000, Rep | 3.006(3) | ..... | Senseless s.u. |
| C(10)-H(7)                     | 1.555        | 3.757    | ..... | # 47 Check     |
| PLAT754_ALERT_4_C Contact Calc | 3.36000, Rep | 3.360(3) | ..... | Senseless s.u. |
| C(10)-H(8)                     | 1.555        | 1.555    | ..... | # 47 Check     |
| PLAT754_ALERT_4_C Contact Calc | 3.16000, Rep | 3.160(3) | ..... | Senseless s.u. |
| C(10)-H(10)                    | 1.555        | 1.555    | ..... | # 47 Check     |
| PLAT754_ALERT_4_C Contact Calc | 3.31000, Rep | 3.308(3) | ..... | Senseless s.u. |
| C(10)-H(11)                    | 1.555        | 1.555    | ..... | # 47 Check     |

|                                |              |          |       |                |
|--------------------------------|--------------|----------|-------|----------------|
| PLAT754_ALERT_4_C Contact Calc | 2.63000, Rep | 2.632(3) | ..... | Senseless s.u. |
| C(10)-H(13)                    | 1.555        | 1.555    | ..... | # 47 Check     |
| PLAT754_ALERT_4_C Contact Calc | 2.55000, Rep | 2.551(4) | ..... | Senseless s.u. |
| C(11)-H(1)                     | 1.555        | 1.555    | ..... | # 47 Check     |
| PLAT754_ALERT_4_C Contact Calc | 2.52000, Rep | 2.517(3) | ..... | Senseless s.u. |
| C(11)-H(6)                     | 1.555        | 1.555    | ..... | # 47 Check     |
| PLAT754_ALERT_4_C Contact Calc | 2.82000, Rep | 2.819(3) | ..... | Senseless s.u. |
| C(11)-H(14)                    | 1.555        | 1.555    | ..... | # 47 Check     |
| PLAT754_ALERT_4_C Contact Calc | 2.69000, Rep | 2.688(3) | ..... | Senseless s.u. |
| C(12)-H(2)                     | 1.555        | 1.555    | ..... | # 47 Check     |
| PLAT754_ALERT_4_C Contact Calc | 2.60000, Rep | 2.597(3) | ..... | Senseless s.u. |
| C(12)-H(3)                     | 1.555        | 1.555    | ..... | # 47 Check     |
| PLAT754_ALERT_4_C Contact Calc | 3.33000, Rep | 3.334(3) | ..... | Senseless s.u. |
| C(12)-H(4)                     | 1.555        | 3.767    | ..... | # 47 Check     |
| PLAT754_ALERT_4_C Contact Calc | 3.21000, Rep | 3.206(3) | ..... | Senseless s.u. |
| C(12)-H(5)                     | 1.555        | 4.555    | ..... | # 47 Check     |
| PLAT754_ALERT_4_C Contact Calc | 3.31000, Rep | 3.307(3) | ..... | Senseless s.u. |
| C(12)-H(6)                     | 1.555        | 4.555    | ..... | # 47 Check     |
| PLAT754_ALERT_4_C Contact Calc | 3.56000, Rep | 3.561(4) | ..... | Senseless s.u. |
| C(12)-H(7)                     | 1.555        | 3.757    | ..... | # 47 Check     |
| PLAT754_ALERT_4_C Contact Calc | 2.92000, Rep | 2.916(3) | ..... | Senseless s.u. |
| C(12)-H(9)                     | 1.555        | 1.555    | ..... | # 47 Check     |
| PLAT754_ALERT_4_C Contact Calc | 2.97000, Rep | 2.974(3) | ..... | Senseless s.u. |
| C(12)-H(10)                    | 1.555        | 1.555    | ..... | # 47 Check     |
| PLAT754_ALERT_4_C Contact Calc | 2.67000, Rep | 2.670(3) | ..... | Senseless s.u. |
| C(12)-H(11)                    | 1.555        | 1.555    | ..... | # 47 Check     |
| PLAT754_ALERT_4_C Contact Calc | 3.32000, Rep | 3.318(4) | ..... | Senseless s.u. |
| C(13)-H(2)                     | 1.555        | 1.565    | ..... | # 47 Check     |
| PLAT754_ALERT_4_C Contact Calc | 3.36000, Rep | 3.358(3) | ..... | Senseless s.u. |
| C(13)-H(3)                     | 1.555        | 1.555    | ..... | # 47 Check     |
| PLAT754_ALERT_4_C Contact Calc | 3.15000, Rep | 3.151(3) | ..... | Senseless s.u. |
| C(13)-H(6)                     | 1.555        | 4.555    | ..... | # 47 Check     |
| PLAT754_ALERT_4_C Contact Calc | 3.09000, Rep | 3.087(3) | ..... | Senseless s.u. |
| C(13)-H(7)                     | 1.555        | 1.555    | ..... | # 47 Check     |
| PLAT754_ALERT_4_C Contact Calc | 2.75000, Rep | 2.752(3) | ..... | Senseless s.u. |
| C(13)-H(8)                     | 1.555        | 1.555    | ..... | # 47 Check     |
| PLAT754_ALERT_4_C Contact Calc | 2.04000, Rep | 2.042(3) | ..... | Senseless s.u. |
| C(13)-H(11)                    | 1.555        | 1.555    | ..... | # 47 Check     |
| PLAT754_ALERT_4_C Contact Calc | 2.79000, Rep | 2.793(2) | ..... | Senseless s.u. |
| C(13)-H(12)                    | 1.555        | 1.555    | ..... | # 47 Check     |
| PLAT754_ALERT_4_C Contact Calc | 2.61000, Rep | 2.613(3) | ..... | Senseless s.u. |
| C(13)-H(13)                    | 1.555        | 1.555    | ..... | # 47 Check     |
| PLAT754_ALERT_4_C Contact Calc | 3.11000, Rep | 3.111(3) | ..... | Senseless s.u. |
| C(14)-H(2)                     | 1.555        | 1.555    | ..... | # 47 Check     |
| PLAT754_ALERT_4_C Contact Calc | 3.19000, Rep | 3.190(3) | ..... | Senseless s.u. |
| C(14)-H(7)                     | 1.555        | 1.555    | ..... | # 47 Check     |
| PLAT754_ALERT_4_C Contact Calc | 2.69000, Rep | 2.691(3) | ..... | Senseless s.u. |
| C(14)-H(8)                     | 1.555        | 1.555    | ..... | # 47 Check     |
| PLAT754_ALERT_4_C Contact Calc | 2.06000, Rep | 2.064(3) | ..... | Senseless s.u. |
| C(14)-H(9)                     | 1.555        | 1.555    | ..... | # 47 Check     |
| PLAT754_ALERT_4_C Contact Calc | 2.04000, Rep | 2.045(4) | ..... | Senseless s.u. |
| C(14)-H(10)                    | 1.555        | 1.555    | ..... | # 47 Check     |
| PLAT754_ALERT_4_C Contact Calc | 2.03000, Rep | 2.031(2) | ..... | Senseless s.u. |
| C(14)-H(12)                    | 1.555        | 1.555    | ..... | # 47 Check     |
| PLAT754_ALERT_4_C Contact Calc | 2.01000, Rep | 2.010(3) | ..... | Senseless s.u. |
| C(14)-H(13)                    | 1.555        | 1.555    | ..... | # 47 Check     |
| PLAT754_ALERT_4_C Contact Calc | 2.85000, Rep | 2.852(3) | ..... | Senseless s.u. |
| C(14)-H(14)                    | 1.555        | 1.555    | ..... | # 47 Check     |
| PLAT754_ALERT_4_C Contact Calc | 3.02000, Rep | 3.016(3) | ..... | Senseless s.u. |
| C(15)-H(9)                     | 1.555        | 1.555    | ..... | # 47 Check     |
| PLAT754_ALERT_4_C Contact Calc | 2.54000, Rep | 2.539(3) | ..... | Senseless s.u. |
| C(15)-H(10)                    | 1.555        | 1.555    | ..... | # 47 Check     |

|                                |              |          |       |                |
|--------------------------------|--------------|----------|-------|----------------|
| PLAT754_ALERT_4_C Contact Calc | 2.03000, Rep | 2.033(3) | ..... | Senseless s.u. |
| C(15)-H(11)                    | 1.555        | 1.555    | ..... | # 47 Check     |
| PLAT754_ALERT_4_C Contact Calc | 2.02000, Rep | 2.017(3) | ..... | Senseless s.u. |
| C(15)-H(14)                    | 1.555        | 1.555    | ..... | # 47 Check     |
| PLAT754_ALERT_4_C Contact Calc | 3.12000, Rep | 3.122(3) | ..... | Senseless s.u. |
| C(16)-H(1)                     | 1.555        | 1.555    | ..... | # 47 Check     |
| PLAT754_ALERT_4_C Contact Calc | 2.90000, Rep | 2.901(3) | ..... | Senseless s.u. |
| C(16)-H(11)                    | 1.555        | 1.555    | ..... | # 47 Check     |
| PLAT754_ALERT_4_C Contact Calc | 2.04000, Rep | 2.037(3) | ..... | Senseless s.u. |
| C(16)-H(12)                    | 1.555        | 1.555    | ..... | # 47 Check     |
| PLAT754_ALERT_4_C Contact Calc | 2.01000, Rep | 2.013(3) | ..... | Senseless s.u. |
| C(16)-H(13)                    | 1.555        | 1.555    | ..... | # 47 Check     |
| PLAT754_ALERT_4_C Contact Calc | 2.66000, Rep | 2.658(3) | ..... | Senseless s.u. |
| C(17)-H(12)                    | 1.555        | 1.555    | ..... | # 47 Check     |
| PLAT754_ALERT_4_C Contact Calc | 2.60000, Rep | 2.599(3) | ..... | Senseless s.u. |
| C(17)-H(13)                    | 1.555        | 1.555    | ..... | # 47 Check     |
| PLAT754_ALERT_4_C Contact Calc | 2.02000, Rep | 2.022(3) | ..... | Senseless s.u. |
| C(17)-H(14)                    | 1.555        | 1.555    | ..... | # 47 Check     |
| PLAT754_ALERT_4_C Contact Calc | 3.51000, Rep | 3.511(3) | ..... | Senseless s.u. |
| C(18)-H(12)                    | 1.555        | 1.555    | ..... | # 47 Check     |
| PLAT754_ALERT_4_C Contact Calc | 3.08000, Rep | 3.077(3) | ..... | Senseless s.u. |
| C(18)-H(12)                    | 1.555        | 2.646    | ..... | # 47 Check     |
| PLAT754_ALERT_4_C Contact Calc | 2.52000, Rep | 2.520(3) | ..... | Senseless s.u. |
| C(18)-H(14)                    | 1.555        | 1.555    | ..... | # 47 Check     |
| PLAT754_ALERT_4_C Contact Calc | 3.11000, Rep | 3.107(4) | ..... | Senseless s.u. |
| C(19)-H(12)                    | 1.555        | 2.646    | ..... | # 47 Check     |
| PLAT754_ALERT_4_C Contact Calc | 3.18000, Rep | 3.178(4) | ..... | Senseless s.u. |
| C(19)-H(14)                    | 1.555        | 2.656    | ..... | # 47 Check     |
| PLAT754_ALERT_4_C Contact Calc | 3.30000, Rep | 3.297(4) | ..... | Senseless s.u. |
| C(20)-H(9)                     | 1.555        | 4.554    | ..... | # 47 Check     |
| PLAT754_ALERT_4_C Contact Calc | 3.36000, Rep | 3.361(3) | ..... | Senseless s.u. |
| C(20)-H(11)                    | 1.555        | 2.656    | ..... | # 47 Check     |
| PLAT754_ALERT_4_C Contact Calc | 3.41000, Rep | 3.407(4) | ..... | Senseless s.u. |
| C(20)-H(12)                    | 1.555        | 2.656    | ..... | # 47 Check     |
| PLAT754_ALERT_4_C Contact Calc | 3.16000, Rep | 3.161(4) | ..... | Senseless s.u. |
| C(20)-H(14)                    | 1.555        | 2.656    | ..... | # 47 Check     |
| PLAT754_ALERT_4_C Contact Calc | 2.85000, Rep | 2.849(4) | ..... | Senseless s.u. |
| C(21)-H(9)                     | 1.555        | 4.554    | ..... | # 47 Check     |
| PLAT754_ALERT_4_C Contact Calc | 3.57000, Rep | 3.571(3) | ..... | Senseless s.u. |
| C(21)-H(11)                    | 1.555        | 4.554    | ..... | # 47 Check     |
| PLAT754_ALERT_4_C Contact Calc | 3.55000, Rep | 3.550(3) | ..... | Senseless s.u. |
| C(21)-H(12)                    | 1.555        | 2.656    | ..... | # 47 Check     |
| PLAT754_ALERT_4_C Contact Calc | 3.35000, Rep | 3.346(3) | ..... | Senseless s.u. |
| C(22)-H(6)                     | 1.555        | 1.555    | ..... | # 47 Check     |
| PLAT754_ALERT_4_C Contact Calc | 3.09000, Rep | 3.089(3) | ..... | Senseless s.u. |
| C(22)-H(9)                     | 1.555        | 4.554    | ..... | # 47 Check     |
| PLAT754_ALERT_4_C Contact Calc | 3.23000, Rep | 3.233(3) | ..... | Senseless s.u. |
| C(22)-H(12)                    | 1.555        | 1.555    | ..... | # 47 Check     |
| PLAT754_ALERT_4_C Contact Calc | 2.67000, Rep | 2.668(3) | ..... | Senseless s.u. |
| C(22)-H(13)                    | 1.555        | 1.555    | ..... | # 47 Check     |
| PLAT754_ALERT_4_C Contact Calc | 3.29000, Rep | 3.288(3) | ..... | Senseless s.u. |
| C(22)-H(14)                    | 1.555        | 1.555    | ..... | # 47 Check     |
| PLAT754_ALERT_4_C Contact Calc | 3.29000, Rep | 3.286(4) | ..... | Senseless s.u. |
| H(1) -N(1)                     | 1.555        | 1.555    | ..... | # 47 Check     |
| PLAT754_ALERT_4_C Contact Calc | 2.16000, Rep | 2.160(3) | ..... | Senseless s.u. |
| H(1) -C(1)                     | 1.555        | 1.555    | ..... | # 47 Check     |
| PLAT754_ALERT_4_C Contact Calc | 1.98000, Rep | 1.984(3) | ..... | Senseless s.u. |
| H(1) -C(3)                     | 1.555        | 1.555    | ..... | # 47 Check     |
| PLAT754_ALERT_4_C Contact Calc | 3.30000, Rep | 3.305(3) | ..... | Senseless s.u. |
| H(1) -C(4)                     | 1.555        | 1.555    | ..... | # 47 Check     |
| PLAT754_ALERT_4_C Contact Calc | 3.16000, Rep | 3.155(3) | ..... | Senseless s.u. |
| H(1) -C(5)                     | 1.555        | 1.545    | ..... | # 47 Check     |



|                                |              |          |       |                |
|--------------------------------|--------------|----------|-------|----------------|
| PLAT754_ALERT_4_C Contact Calc | 3.08000, Rep | 3.085(3) | ..... | Senseless s.u. |
| H(1) -C(6)                     | 1.555        | 1.545    | ..... | # 47 Check     |
| PLAT754_ALERT_4_C Contact Calc | 3.29000, Rep | 3.287(4) | ..... | Senseless s.u. |
| H(1) -C(7)                     | 1.555        | 1.545    | ..... | # 47 Check     |
| PLAT754_ALERT_4_C Contact Calc | 3.55000, Rep | 3.546(3) | ..... | Senseless s.u. |
| H(1) -C(8)                     | 1.555        | 1.545    | ..... | # 47 Check     |
| PLAT754_ALERT_4_C Contact Calc | 3.25000, Rep | 3.252(3) | ..... | Senseless s.u. |
| H(1) -C(9)                     | 1.555        | 1.555    | ..... | # 47 Check     |
| PLAT754_ALERT_4_C Contact Calc | 3.45000, Rep | 3.450(3) | ..... | Senseless s.u. |
| H(1) -C(10)                    | 1.555        | 1.545    | ..... | # 47 Check     |
| PLAT754_ALERT_4_C Contact Calc | 2.55000, Rep | 2.551(4) | ..... | Senseless s.u. |
| H(1) -C(11)                    | 1.555        | 1.555    | ..... | # 47 Check     |
| PLAT754_ALERT_4_C Contact Calc | 3.12000, Rep | 3.122(3) | ..... | Senseless s.u. |
| H(1) -C(16)                    | 1.555        | 1.555    | ..... | # 47 Check     |
| PLAT754_ALERT_4_C Contact Calc | 2.30000, Rep | 2.299(3) | ..... | Senseless s.u. |
| H(1) -H(2)                     | 1.555        | 1.555    | ..... | # 47 Check     |
| PLAT754_ALERT_4_C Contact Calc | 3.53000, Rep | 3.528(3) | ..... | Senseless s.u. |
| H(1) -H(3)                     | 1.555        | 1.545    | ..... | # 47 Check     |
| PLAT754_ALERT_4_C Contact Calc | 3.45000, Rep | 3.450(3) | ..... | Senseless s.u. |
| H(1) -H(4)                     | 1.555        | 1.545    | ..... | # 47 Check     |
| PLAT754_ALERT_4_C Contact Calc | 3.08000, Rep | 3.077(4) | ..... | Senseless s.u. |
| H(1) -H(10)                    | 1.555        | 1.545    | ..... | # 47 Check     |
| PLAT754_ALERT_4_C Contact Calc | 2.68000, Rep | 2.683(3) | ..... | Senseless s.u. |
| H(1) -H(13)                    | 1.555        | 1.545    | ..... | # 47 Check     |
| PLAT754_ALERT_4_C Contact Calc | 2.91000, Rep | 2.905(3) | ..... | Senseless s.u. |
| H(1) -H(14)                    | 1.555        | 1.555    | ..... | # 47 Check     |
| PLAT754_ALERT_4_C Contact Calc | 3.35000, Rep | 3.353(3) | ..... | Senseless s.u. |
| H(2) -O(1)                     | 1.555        | 1.545    | ..... | # 47 Check     |
| PLAT754_ALERT_4_C Contact Calc | 3.33000, Rep | 3.330(3) | ..... | Senseless s.u. |
| H(2) -C(1)                     | 1.555        | 1.555    | ..... | # 47 Check     |
| PLAT754_ALERT_4_C Contact Calc | 1.99000, Rep | 1.987(3) | ..... | Senseless s.u. |
| H(2) -C(2)                     | 1.555        | 1.555    | ..... | # 47 Check     |
| PLAT754_ALERT_4_C Contact Calc | 2.14000, Rep | 2.144(3) | ..... | Senseless s.u. |
| H(2) -C(4)                     | 1.555        | 1.555    | ..... | # 47 Check     |
| PLAT754_ALERT_4_C Contact Calc | 3.27000, Rep | 3.273(3) | ..... | Senseless s.u. |
| H(2) -C(5)                     | 1.555        | 1.545    | ..... | # 47 Check     |
| PLAT754_ALERT_4_C Contact Calc | 3.20000, Rep | 3.199(3) | ..... | Senseless s.u. |
| H(2) -C(5)                     | 1.555        | 3.757    | ..... | # 47 Check     |
| PLAT754_ALERT_4_C Contact Calc | 3.39000, Rep | 3.391(3) | ..... | Senseless s.u. |
| H(2) -C(6)                     | 1.555        | 3.757    | ..... | # 47 Check     |
| PLAT754_ALERT_4_C Contact Calc | 3.24000, Rep | 3.244(3) | ..... | Senseless s.u. |
| H(2) -C(10)                    | 1.555        | 1.555    | ..... | # 47 Check     |
| PLAT754_ALERT_4_C Contact Calc | 2.69000, Rep | 2.688(3) | ..... | Senseless s.u. |
| H(2) -C(12)                    | 1.555        | 1.555    | ..... | # 47 Check     |
| PLAT754_ALERT_4_C Contact Calc | 3.32000, Rep | 3.318(4) | ..... | Senseless s.u. |
| H(2) -C(13)                    | 1.555        | 1.545    | ..... | # 47 Check     |
| PLAT754_ALERT_4_C Contact Calc | 3.11000, Rep | 3.111(3) | ..... | Senseless s.u. |
| H(2) -C(14)                    | 1.555        | 1.555    | ..... | # 47 Check     |
| PLAT754_ALERT_4_C Contact Calc | 2.30000, Rep | 2.299(3) | ..... | Senseless s.u. |
| H(2) -H(1)                     | 1.555        | 1.555    | ..... | # 47 Check     |
| PLAT754_ALERT_4_C Contact Calc | 2.97000, Rep | 2.973(3) | ..... | Senseless s.u. |
| H(2) -H(3)                     | 1.555        | 1.545    | ..... | # 47 Check     |
| PLAT754_ALERT_4_C Contact Calc | 2.74000, Rep | 2.742(3) | ..... | Senseless s.u. |
| H(2) -H(3)                     | 1.555        | 3.757    | ..... | # 47 Check     |
| PLAT754_ALERT_4_C Contact Calc | 3.08000, Rep | 3.081(3) | ..... | Senseless s.u. |
| H(2) -H(4)                     | 1.555        | 3.757    | ..... | # 47 Check     |
| PLAT754_ALERT_4_C Contact Calc | 3.01000, Rep | 3.007(3) | ..... | Senseless s.u. |
| H(2) -H(7)                     | 1.555        | 1.555    | ..... | # 47 Check     |
| PLAT754_ALERT_4_C Contact Calc | 3.47000, Rep | 3.471(3) | ..... | Senseless s.u. |
| H(2) -H(7)                     | 1.555        | 3.757    | ..... | # 47 Check     |
| PLAT754_ALERT_4_C Contact Calc | 2.46000, Rep | 2.458(3) | ..... | Senseless s.u. |
| H(2) -H(8)                     | 1.555        | 1.555    | ..... | # 47 Check     |

|                                |              |          |       |                |
|--------------------------------|--------------|----------|-------|----------------|
| PLAT754_ALERT_4_C Contact Calc | 2.55000, Rep | 2.547(4) | ..... | Senseless s.u. |
| H(2) -H(10)                    | 1.555        | 1.545    | ..... | # 47 Check     |
| PLAT754_ALERT_4_C Contact Calc | 2.94000, Rep | 2.938(3) | ..... | Senseless s.u. |
| H(2) -H(11)                    | 1.555        | 1.555    | ..... | # 47 Check     |
| PLAT754_ALERT_4_C Contact Calc | 2.64000, Rep | 2.639(3) | ..... | Senseless s.u. |
| H(3) -O(1)                     | 1.555        | 1.555    | ..... | # 47 Check     |
| PLAT754_ALERT_4_C Contact Calc | 3.26000, Rep | 3.258(3) | ..... | Senseless s.u. |
| H(3) -C(3)                     | 1.555        | 3.757    | ..... | # 47 Check     |
| PLAT754_ALERT_4_C Contact Calc | 2.75000, Rep | 2.746(3) | ..... | Senseless s.u. |
| H(3) -C(4)                     | 1.555        | 1.555    | ..... | # 47 Check     |
| PLAT754_ALERT_4_C Contact Calc | 3.15000, Rep | 3.154(3) | ..... | Senseless s.u. |
| H(3) -C(5)                     | 1.555        | 3.767    | ..... | # 47 Check     |
| PLAT754_ALERT_4_C Contact Calc | 2.03000, Rep | 2.035(3) | ..... | Senseless s.u. |
| H(3) -C(6)                     | 1.555        | 1.555    | ..... | # 47 Check     |
| PLAT754_ALERT_4_C Contact Calc | 3.26000, Rep | 3.264(3) | ..... | Senseless s.u. |
| H(3) -C(6)                     | 1.555        | 3.767    | ..... | # 47 Check     |
| PLAT754_ALERT_4_C Contact Calc | 3.25000, Rep | 3.248(3) | ..... | Senseless s.u. |
| H(3) -C(7)                     | 1.555        | 1.555    | ..... | # 47 Check     |
| PLAT754_ALERT_4_C Contact Calc | 3.26000, Rep | 3.261(3) | ..... | Senseless s.u. |
| H(3) -C(9)                     | 1.555        | 1.555    | ..... | # 47 Check     |
| PLAT754_ALERT_4_C Contact Calc | 2.03000, Rep | 2.031(3) | ..... | Senseless s.u. |
| H(3) -C(10)                    | 1.555        | 1.555    | ..... | # 47 Check     |
| PLAT754_ALERT_4_C Contact Calc | 2.60000, Rep | 2.597(3) | ..... | Senseless s.u. |
| H(3) -C(12)                    | 1.555        | 1.555    | ..... | # 47 Check     |
| PLAT754_ALERT_4_C Contact Calc | 3.36000, Rep | 3.358(3) | ..... | Senseless s.u. |
| H(3) -C(13)                    | 1.555        | 1.555    | ..... | # 47 Check     |
| PLAT754_ALERT_4_C Contact Calc | 3.53000, Rep | 3.528(3) | ..... | Senseless s.u. |
| H(3) -H(1)                     | 1.555        | 1.565    | ..... | # 47 Check     |
| PLAT754_ALERT_4_C Contact Calc | 2.97000, Rep | 2.973(3) | ..... | Senseless s.u. |
| H(3) -H(2)                     | 1.555        | 1.565    | ..... | # 47 Check     |
| PLAT754_ALERT_4_C Contact Calc | 2.74000, Rep | 2.742(3) | ..... | Senseless s.u. |
| H(3) -H(2)                     | 1.555        | 3.757    | ..... | # 47 Check     |
| PLAT754_ALERT_4_C Contact Calc | 2.50000, Rep | 2.504(3) | ..... | Senseless s.u. |
| H(3) -H(3)                     | 1.555        | 3.767    | ..... | # 47 Check     |
| PLAT754_ALERT_4_C Contact Calc | 2.33000, Rep | 2.333(3) | ..... | Senseless s.u. |
| H(3) -H(4)                     | 1.555        | 1.555    | ..... | # 47 Check     |
| PLAT754_ALERT_4_C Contact Calc | 2.73000, Rep | 2.735(3) | ..... | Senseless s.u. |
| H(3) -H(4)                     | 1.555        | 3.767    | ..... | # 47 Check     |
| PLAT754_ALERT_4_C Contact Calc | 2.21000, Rep | 2.207(3) | ..... | Senseless s.u. |
| H(3) -H(7)                     | 1.555        | 1.555    | ..... | # 47 Check     |
| PLAT754_ALERT_4_C Contact Calc | 3.18000, Rep | 3.176(3) | ..... | Senseless s.u. |
| H(3) -H(7)                     | 1.555        | 3.757    | ..... | # 47 Check     |
| PLAT754_ALERT_4_C Contact Calc | 3.52000, Rep | 3.524(3) | ..... | Senseless s.u. |
| H(3) -H(8)                     | 1.555        | 1.555    | ..... | # 47 Check     |
| PLAT754_ALERT_4_C Contact Calc | 3.54000, Rep | 3.537(3) | ..... | Senseless s.u. |
| H(3) -H(8)                     | 1.555        | 3.757    | ..... | # 47 Check     |
| PLAT754_ALERT_4_C Contact Calc | 3.25000, Rep | 3.251(3) | ..... | Senseless s.u. |
| H(3) -H(10)                    | 1.555        | 1.555    | ..... | # 47 Check     |
| PLAT754_ALERT_4_C Contact Calc | 2.56000, Rep | 2.565(3) | ..... | Senseless s.u. |
| H(4) -O(1)                     | 1.555        | 3.767    | ..... | # 47 Check     |
| PLAT754_ALERT_4_C Contact Calc | 2.03000, Rep | 2.031(3) | ..... | Senseless s.u. |
| H(4) -C(5)                     | 1.555        | 1.555    | ..... | # 47 Check     |
| PLAT754_ALERT_4_C Contact Calc | 2.03000, Rep | 2.026(3) | ..... | Senseless s.u. |
| H(4) -C(7)                     | 1.555        | 1.555    | ..... | # 47 Check     |
| PLAT754_ALERT_4_C Contact Calc | 3.26000, Rep | 3.255(3) | ..... | Senseless s.u. |
| H(4) -C(8)                     | 1.555        | 1.555    | ..... | # 47 Check     |
| PLAT754_ALERT_4_C Contact Calc | 3.35000, Rep | 3.347(3) | ..... | Senseless s.u. |
| H(4) -C(8)                     | 1.555        | 2.756    | ..... | # 47 Check     |
| PLAT754_ALERT_4_C Contact Calc | 3.26000, Rep | 3.264(3) | ..... | Senseless s.u. |
| H(4) -C(10)                    | 1.555        | 1.555    | ..... | # 47 Check     |
| PLAT754_ALERT_4_C Contact Calc | 3.33000, Rep | 3.334(3) | ..... | Senseless s.u. |
| H(4) -C(12)                    | 1.555        | 3.767    | ..... | # 47 Check     |

|                                |              |          |       |                |
|--------------------------------|--------------|----------|-------|----------------|
| PLAT754_ALERT_4_C Contact Calc | 3.45000, Rep | 3.450(3) | ..... | Senseless s.u. |
| H(4) -H(1)                     | 1.555        | 1.565    | ..... | # 47 Check     |
| PLAT754_ALERT_4_C Contact Calc | 3.08000, Rep | 3.081(3) | ..... | Senseless s.u. |
| H(4) -H(2)                     | 1.555        | 3.757    | ..... | # 47 Check     |
| PLAT754_ALERT_4_C Contact Calc | 2.33000, Rep | 2.333(3) | ..... | Senseless s.u. |
| H(4) -H(3)                     | 1.555        | 1.555    | ..... | # 47 Check     |
| PLAT754_ALERT_4_C Contact Calc | 2.73000, Rep | 2.735(3) | ..... | Senseless s.u. |
| H(4) -H(3)                     | 1.555        | 3.767    | ..... | # 47 Check     |
| PLAT754_ALERT_4_C Contact Calc | 2.33000, Rep | 2.328(3) | ..... | Senseless s.u. |
| H(4) -H(5)                     | 1.555        | 1.555    | ..... | # 47 Check     |
| PLAT754_ALERT_4_C Contact Calc | 3.42000, Rep | 3.423(4) | ..... | Senseless s.u. |
| H(4) -H(5)                     | 1.555        | 2.756    | ..... | # 47 Check     |
| PLAT754_ALERT_4_C Contact Calc | 2.82000, Rep | 2.816(3) | ..... | Senseless s.u. |
| H(4) -H(6)                     | 1.555        | 2.756    | ..... | # 47 Check     |
| PLAT754_ALERT_4_C Contact Calc | 3.04000, Rep | 3.042(3) | ..... | Senseless s.u. |
| H(4) -H(7)                     | 1.555        | 3.767    | ..... | # 47 Check     |
| PLAT754_ALERT_4_C Contact Calc | 3.45000, Rep | 3.452(3) | ..... | Senseless s.u. |
| H(4) -H(8)                     | 1.555        | 3.757    | ..... | # 47 Check     |
| PLAT754_ALERT_4_C Contact Calc | 3.26000, Rep | 3.256(2) | ..... | Senseless s.u. |
| H(5) -O(1)                     | 1.555        | 4.554    | ..... | # 47 Check     |
| PLAT754_ALERT_4_C Contact Calc | 3.25000, Rep | 3.249(3) | ..... | Senseless s.u. |
| H(5) -C(5)                     | 1.555        | 1.555    | ..... | # 47 Check     |
| PLAT754_ALERT_4_C Contact Calc | 2.03000, Rep | 2.025(3) | ..... | Senseless s.u. |
| H(5) -C(6)                     | 1.555        | 1.555    | ..... | # 47 Check     |
| PLAT754_ALERT_4_C Contact Calc | 3.25000, Rep | 3.252(4) | ..... | Senseless s.u. |
| H(5) -C(7)                     | 1.555        | 2.756    | ..... | # 47 Check     |
| PLAT754_ALERT_4_C Contact Calc | 2.03000, Rep | 2.031(3) | ..... | Senseless s.u. |
| H(5) -C(8)                     | 1.555        | 1.555    | ..... | # 47 Check     |
| PLAT754_ALERT_4_C Contact Calc | 3.06000, Rep | 3.060(3) | ..... | Senseless s.u. |
| H(5) -C(8)                     | 1.555        | 2.756    | ..... | # 47 Check     |
| PLAT754_ALERT_4_C Contact Calc | 3.26000, Rep | 3.261(3) | ..... | Senseless s.u. |
| H(5) -C(9)                     | 1.555        | 1.555    | ..... | # 47 Check     |
| PLAT754_ALERT_4_C Contact Calc | 3.52000, Rep | 3.521(3) | ..... | Senseless s.u. |
| H(5) -C(9)                     | 1.555        | 2.756    | ..... | # 47 Check     |
| PLAT754_ALERT_4_C Contact Calc | 3.21000, Rep | 3.206(3) | ..... | Senseless s.u. |
| H(5) -C(12)                    | 1.555        | 4.554    | ..... | # 47 Check     |
| PLAT754_ALERT_4_C Contact Calc | 2.33000, Rep | 2.328(3) | ..... | Senseless s.u. |
| H(5) -H(4)                     | 1.555        | 1.555    | ..... | # 47 Check     |
| PLAT754_ALERT_4_C Contact Calc | 3.42000, Rep | 3.423(4) | ..... | Senseless s.u. |
| H(5) -H(4)                     | 1.555        | 2.746    | ..... | # 47 Check     |
| PLAT754_ALERT_4_C Contact Calc | 3.46000, Rep | 3.465(4) | ..... | Senseless s.u. |
| H(5) -H(5)                     | 1.555        | 2.746    | ..... | # 47 Check     |
| PLAT754_ALERT_4_C Contact Calc | 3.46000, Rep | 3.465(4) | ..... | Senseless s.u. |
| H(5) -H(5)                     | 1.555        | 2.756    | ..... | # 47 Check     |
| PLAT754_ALERT_4_C Contact Calc | 2.34000, Rep | 2.340(3) | ..... | Senseless s.u. |
| H(5) -H(6)                     | 1.555        | 1.555    | ..... | # 47 Check     |
| PLAT754_ALERT_4_C Contact Calc | 3.16000, Rep | 3.161(3) | ..... | Senseless s.u. |
| H(5) -H(6)                     | 1.555        | 2.756    | ..... | # 47 Check     |
| PLAT754_ALERT_4_C Contact Calc | 3.11000, Rep | 3.114(3) | ..... | Senseless s.u. |
| H(5) -H(7)                     | 1.555        | 4.554    | ..... | # 47 Check     |
| PLAT754_ALERT_4_C Contact Calc | 2.84000, Rep | 2.841(3) | ..... | Senseless s.u. |
| H(5) -H(8)                     | 1.555        | 4.554    | ..... | # 47 Check     |
| PLAT754_ALERT_4_C Contact Calc | 2.37000, Rep | 2.367(3) | ..... | Senseless s.u. |
| H(6) -O(1)                     | 1.555        | 4.554    | ..... | # 47 Check     |
| PLAT754_ALERT_4_C Contact Calc | 2.94000, Rep | 2.942(3) | ..... | Senseless s.u. |
| H(6) -N(1)                     | 1.555        | 1.555    | ..... | # 47 Check     |
| PLAT754_ALERT_4_C Contact Calc | 2.73000, Rep | 2.732(3) | ..... | Senseless s.u. |
| H(6) -C(1)                     | 1.555        | 1.555    | ..... | # 47 Check     |
| PLAT754_ALERT_4_C Contact Calc | 3.26000, Rep | 3.256(3) | ..... | Senseless s.u. |
| H(6) -C(6)                     | 1.555        | 1.555    | ..... | # 47 Check     |
| PLAT754_ALERT_4_C Contact Calc | 3.53000, Rep | 3.533(3) | ..... | Senseless s.u. |
| H(6) -C(6)                     | 1.555        | 2.746    | ..... | # 47 Check     |

|                                |              |          |       |                |
|--------------------------------|--------------|----------|-------|----------------|
| PLAT754_ALERT_4_C Contact Calc | 2.04000, Rep | 2.042(3) | ..... | Senseless s.u. |
| H(6) -C(7)                     | 1.555        | 1.555    | ..... | # 47 Check     |
| PLAT754_ALERT_4_C Contact Calc | 2.04000, Rep | 2.037(3) | ..... | Senseless s.u. |
| H(6) -C(9)                     | 1.555        | 1.555    | ..... | # 47 Check     |
| PLAT754_ALERT_4_C Contact Calc | 3.27000, Rep | 3.274(3) | ..... | Senseless s.u. |
| H(6) -C(10)                    | 1.555        | 1.555    | ..... | # 47 Check     |
| PLAT754_ALERT_4_C Contact Calc | 2.52000, Rep | 2.517(3) | ..... | Senseless s.u. |
| H(6) -C(11)                    | 1.555        | 1.555    | ..... | # 47 Check     |
| PLAT754_ALERT_4_C Contact Calc | 3.31000, Rep | 3.307(3) | ..... | Senseless s.u. |
| H(6) -C(12)                    | 1.555        | 4.554    | ..... | # 47 Check     |
| PLAT754_ALERT_4_C Contact Calc | 3.15000, Rep | 3.151(3) | ..... | Senseless s.u. |
| H(6) -C(13)                    | 1.555        | 4.554    | ..... | # 47 Check     |
| PLAT754_ALERT_4_C Contact Calc | 3.35000, Rep | 3.346(3) | ..... | Senseless s.u. |
| H(6) -C(22)                    | 1.555        | 1.555    | ..... | # 47 Check     |
| PLAT754_ALERT_4_C Contact Calc | 2.82000, Rep | 2.816(3) | ..... | Senseless s.u. |
| H(6) -H(4)                     | 1.555        | 2.746    | ..... | # 47 Check     |
| PLAT754_ALERT_4_C Contact Calc | 2.34000, Rep | 2.340(3) | ..... | Senseless s.u. |
| H(6) -H(5)                     | 1.555        | 1.555    | ..... | # 47 Check     |
| PLAT754_ALERT_4_C Contact Calc | 3.16000, Rep | 3.161(3) | ..... | Senseless s.u. |
| H(6) -H(5)                     | 1.555        | 2.746    | ..... | # 47 Check     |
| PLAT754_ALERT_4_C Contact Calc | 3.27000, Rep | 3.266(3) | ..... | Senseless s.u. |
| H(6) -H(8)                     | 1.555        | 4.554    | ..... | # 47 Check     |
| PLAT754_ALERT_4_C Contact Calc | 2.92000, Rep | 2.919(3) | ..... | Senseless s.u. |
| H(6) -H(9)                     | 1.555        | 4.554    | ..... | # 47 Check     |
| PLAT754_ALERT_4_C Contact Calc | 1.97000, Rep | 1.969(3) | ..... | Senseless s.u. |
| H(7) -O(1)                     | 1.555        | 1.555    | ..... | # 47 Check     |
| PLAT754_ALERT_4_C Contact Calc | 2.94000, Rep | 2.938(3) | ..... | Senseless s.u. |
| H(7) -C(3)                     | 1.555        | 1.555    | ..... | # 47 Check     |
| PLAT754_ALERT_4_C Contact Calc | 3.36000, Rep | 3.361(3) | ..... | Senseless s.u. |
| H(7) -C(3)                     | 1.555        | 3.757    | ..... | # 47 Check     |
| PLAT754_ALERT_4_C Contact Calc | 2.05000, Rep | 2.053(2) | ..... | Senseless s.u. |
| H(7) -C(4)                     | 1.555        | 1.555    | ..... | # 47 Check     |
| PLAT754_ALERT_4_C Contact Calc | 3.40000, Rep | 3.397(3) | ..... | Senseless s.u. |
| H(7) -C(4)                     | 1.555        | 3.757    | ..... | # 47 Check     |
| PLAT754_ALERT_4_C Contact Calc | 2.69000, Rep | 2.689(3) | ..... | Senseless s.u. |
| H(7) -C(5)                     | 1.555        | 1.555    | ..... | # 47 Check     |
| PLAT754_ALERT_4_C Contact Calc | 3.00000, Rep | 2.998(3) | ..... | Senseless s.u. |
| H(7) -C(5)                     | 1.555        | 3.757    | ..... | # 47 Check     |
| PLAT754_ALERT_4_C Contact Calc | 3.54000, Rep | 3.542(3) | ..... | Senseless s.u. |
| H(7) -C(6)                     | 1.555        | 3.757    | ..... | # 47 Check     |
| PLAT754_ALERT_4_C Contact Calc | 3.59000, Rep | 3.587(3) | ..... | Senseless s.u. |
| H(7) -C(9)                     | 1.555        | 3.757    | ..... | # 47 Check     |
| PLAT754_ALERT_4_C Contact Calc | 2.65000, Rep | 2.649(3) | ..... | Senseless s.u. |
| H(7) -C(10)                    | 1.555        | 1.555    | ..... | # 47 Check     |
| PLAT754_ALERT_4_C Contact Calc | 3.01000, Rep | 3.006(3) | ..... | Senseless s.u. |
| H(7) -C(10)                    | 1.555        | 3.757    | ..... | # 47 Check     |
| PLAT754_ALERT_4_C Contact Calc | 3.56000, Rep | 3.561(4) | ..... | Senseless s.u. |
| H(7) -C(12)                    | 1.555        | 3.757    | ..... | # 47 Check     |
| PLAT754_ALERT_4_C Contact Calc | 3.09000, Rep | 3.087(3) | ..... | Senseless s.u. |
| H(7) -C(13)                    | 1.555        | 1.555    | ..... | # 47 Check     |
| PLAT754_ALERT_4_C Contact Calc | 3.19000, Rep | 3.190(3) | ..... | Senseless s.u. |
| H(7) -C(14)                    | 1.555        | 1.555    | ..... | # 47 Check     |
| PLAT754_ALERT_4_C Contact Calc | 3.01000, Rep | 3.007(3) | ..... | Senseless s.u. |
| H(7) -H(2)                     | 1.555        | 1.555    | ..... | # 47 Check     |
| PLAT754_ALERT_4_C Contact Calc | 3.47000, Rep | 3.471(3) | ..... | Senseless s.u. |
| H(7) -H(2)                     | 1.555        | 3.757    | ..... | # 47 Check     |
| PLAT754_ALERT_4_C Contact Calc | 2.21000, Rep | 2.207(3) | ..... | Senseless s.u. |
| H(7) -H(3)                     | 1.555        | 1.555    | ..... | # 47 Check     |
| PLAT754_ALERT_4_C Contact Calc | 3.18000, Rep | 3.176(3) | ..... | Senseless s.u. |
| H(7) -H(3)                     | 1.555        | 3.757    | ..... | # 47 Check     |
| PLAT754_ALERT_4_C Contact Calc | 3.04000, Rep | 3.042(3) | ..... | Senseless s.u. |
| H(7) -H(4)                     | 1.555        | 3.767    | ..... | # 47 Check     |

|                                |              |          |       |                |
|--------------------------------|--------------|----------|-------|----------------|
| PLAT754_ALERT_4_C Contact Calc | 3.11000, Rep | 3.114(3) | ..... | Senseless s.u. |
| H(7) -H(5)                     | 1.555        | 4.555    | ..... | # 47 Check     |
| PLAT754_ALERT_4_C Contact Calc | 2.91000, Rep | 2.914(4) | ..... | Senseless s.u. |
| H(7) -H(7)                     | 1.555        | 3.757    | ..... | # 47 Check     |
| PLAT754_ALERT_4_C Contact Calc | 1.55000, Rep | 1.551(4) | ..... | Senseless s.u. |
| H(7) -H(8)                     | 1.555        | 1.555    | ..... | # 47 Check     |
| PLAT754_ALERT_4_C Contact Calc | 3.59000, Rep | 3.593(3) | ..... | Senseless s.u. |
| H(7) -H(10)                    | 1.555        | 1.555    | ..... | # 47 Check     |
| PLAT754_ALERT_4_C Contact Calc | 3.58000, Rep | 3.579(3) | ..... | Senseless s.u. |
| H(7) -H(11)                    | 1.555        | 1.555    | ..... | # 47 Check     |
| PLAT754_ALERT_4_C Contact Calc | 1.98000, Rep | 1.980(3) | ..... | Senseless s.u. |
| H(8) -O(1)                     | 1.555        | 1.555    | ..... | # 47 Check     |
| PLAT754_ALERT_4_C Contact Calc | 2.90000, Rep | 2.900(4) | ..... | Senseless s.u. |
| H(8) -N(1)                     | 1.555        | 4.545    | ..... | # 47 Check     |
| PLAT754_ALERT_4_C Contact Calc | 2.63000, Rep | 2.627(3) | ..... | Senseless s.u. |
| H(8) -C(3)                     | 1.555        | 1.555    | ..... | # 47 Check     |
| PLAT754_ALERT_4_C Contact Calc | 2.06000, Rep | 2.061(3) | ..... | Senseless s.u. |
| H(8) -C(4)                     | 1.555        | 1.555    | ..... | # 47 Check     |
| PLAT754_ALERT_4_C Contact Calc | 3.34000, Rep | 3.345(3) | ..... | Senseless s.u. |
| H(8) -C(5)                     | 1.555        | 3.757    | ..... | # 47 Check     |
| PLAT754_ALERT_4_C Contact Calc | 3.31000, Rep | 3.312(3) | ..... | Senseless s.u. |
| H(8) -C(6)                     | 1.555        | 3.757    | ..... | # 47 Check     |
| PLAT754_ALERT_4_C Contact Calc | 3.52000, Rep | 3.521(3) | ..... | Senseless s.u. |
| H(8) -C(7)                     | 1.555        | 4.555    | ..... | # 47 Check     |
| PLAT754_ALERT_4_C Contact Calc | 3.36000, Rep | 3.360(3) | ..... | Senseless s.u. |
| H(8) -C(10)                    | 1.555        | 1.555    | ..... | # 47 Check     |
| PLAT754_ALERT_4_C Contact Calc | 2.75000, Rep | 2.752(3) | ..... | Senseless s.u. |
| H(8) -C(13)                    | 1.555        | 1.555    | ..... | # 47 Check     |
| PLAT754_ALERT_4_C Contact Calc | 2.69000, Rep | 2.691(3) | ..... | Senseless s.u. |
| H(8) -C(14)                    | 1.555        | 1.555    | ..... | # 47 Check     |
| PLAT754_ALERT_4_C Contact Calc | 2.46000, Rep | 2.458(3) | ..... | Senseless s.u. |
| H(8) -H(2)                     | 1.555        | 1.555    | ..... | # 47 Check     |
| PLAT754_ALERT_4_C Contact Calc | 3.52000, Rep | 3.524(3) | ..... | Senseless s.u. |
| H(8) -H(3)                     | 1.555        | 1.555    | ..... | # 47 Check     |
| PLAT754_ALERT_4_C Contact Calc | 3.54000, Rep | 3.537(3) | ..... | Senseless s.u. |
| H(8) -H(3)                     | 1.555        | 3.757    | ..... | # 47 Check     |
| PLAT754_ALERT_4_C Contact Calc | 3.45000, Rep | 3.452(3) | ..... | Senseless s.u. |
| H(8) -H(4)                     | 1.555        | 3.757    | ..... | # 47 Check     |
| PLAT754_ALERT_4_C Contact Calc | 2.84000, Rep | 2.841(3) | ..... | Senseless s.u. |
| H(8) -H(5)                     | 1.555        | 4.555    | ..... | # 47 Check     |
| PLAT754_ALERT_4_C Contact Calc | 3.27000, Rep | 3.266(3) | ..... | Senseless s.u. |
| H(8) -H(6)                     | 1.555        | 4.555    | ..... | # 47 Check     |
| PLAT754_ALERT_4_C Contact Calc | 1.55000, Rep | 1.551(4) | ..... | Senseless s.u. |
| H(8) -H(7)                     | 1.555        | 1.555    | ..... | # 47 Check     |
| PLAT754_ALERT_4_C Contact Calc | 3.10000, Rep | 3.098(3) | ..... | Senseless s.u. |
| H(8) -H(9)                     | 1.555        | 1.555    | ..... | # 47 Check     |
| PLAT754_ALERT_4_C Contact Calc | 3.57000, Rep | 3.572(3) | ..... | Senseless s.u. |
| H(8) -H(10)                    | 1.555        | 1.555    | ..... | # 47 Check     |
| PLAT754_ALERT_4_C Contact Calc | 2.66000, Rep | 2.663(3) | ..... | Senseless s.u. |
| H(8) -H(11)                    | 1.555        | 1.555    | ..... | # 47 Check     |
| PLAT754_ALERT_4_C Contact Calc | 1.96000, Rep | 1.961(3) | ..... | Senseless s.u. |
| H(9) -O(1)                     | 1.555        | 1.555    | ..... | # 47 Check     |
| PLAT754_ALERT_4_C Contact Calc | 3.35000, Rep | 3.351(4) | ..... | Senseless s.u. |
| H(9) -N(1)                     | 1.555        | 4.555    | ..... | # 47 Check     |
| PLAT754_ALERT_4_C Contact Calc | 3.16000, Rep | 3.158(3) | ..... | Senseless s.u. |
| H(9) -C(4)                     | 1.555        | 1.555    | ..... | # 47 Check     |
| PLAT754_ALERT_4_C Contact Calc | 2.92000, Rep | 2.916(3) | ..... | Senseless s.u. |
| H(9) -C(12)                    | 1.555        | 1.555    | ..... | # 47 Check     |
| PLAT754_ALERT_4_C Contact Calc | 2.06000, Rep | 2.064(3) | ..... | Senseless s.u. |
| H(9) -C(14)                    | 1.555        | 1.555    | ..... | # 47 Check     |
| PLAT754_ALERT_4_C Contact Calc | 3.02000, Rep | 3.016(3) | ..... | Senseless s.u. |
| H(9) -C(15)                    | 1.555        | 1.555    | ..... | # 47 Check     |

|                                |              |          |       |                |
|--------------------------------|--------------|----------|-------|----------------|
| PLAT754_ALERT_4_C Contact Calc | 3.30000, Rep | 3.297(4) | ..... | Senseless s.u. |
| H(9) -C(20)                    | 1.555 4.555  | .....    | #     | 47 Check       |
| PLAT754_ALERT_4_C Contact Calc | 2.85000, Rep | 2.849(4) | ..... | Senseless s.u. |
| H(9) -C(21)                    | 1.555 4.555  | .....    | #     | 47 Check       |
| PLAT754_ALERT_4_C Contact Calc | 3.09000, Rep | 3.089(3) | ..... | Senseless s.u. |
| H(9) -C(22)                    | 1.555 4.555  | .....    | #     | 47 Check       |
| PLAT754_ALERT_4_C Contact Calc | 2.92000, Rep | 2.919(3) | ..... | Senseless s.u. |
| H(9) -H(6)                     | 1.555 4.555  | .....    | #     | 47 Check       |
| PLAT754_ALERT_4_C Contact Calc | 3.10000, Rep | 3.098(3) | ..... | Senseless s.u. |
| H(9) -H(8)                     | 1.555 1.555  | .....    | #     | 47 Check       |
| PLAT754_ALERT_4_C Contact Calc | 1.55000, Rep | 1.551(4) | ..... | Senseless s.u. |
| H(9) -H(10)                    | 1.555 1.555  | .....    | #     | 47 Check       |
| PLAT754_ALERT_4_C Contact Calc | 2.20000, Rep | 2.200(3) | ..... | Senseless s.u. |
| H(9) -H(11)                    | 1.555 1.555  | .....    | #     | 47 Check       |
| PLAT754_ALERT_4_C Contact Calc | 2.97000, Rep | 2.974(3) | ..... | Senseless s.u. |
| H(9) -H(12)                    | 1.555 1.555  | .....    | #     | 47 Check       |
| PLAT754_ALERT_4_C Contact Calc | 3.22000, Rep | 3.222(3) | ..... | Senseless s.u. |
| H(9) -H(13)                    | 1.555 1.555  | .....    | #     | 47 Check       |
| PLAT754_ALERT_4_C Contact Calc | 1.95000, Rep | 1.954(2) | ..... | Senseless s.u. |
| H(10)-O(1)                     | 1.555 1.555  | .....    | #     | 47 Check       |
| PLAT754_ALERT_4_C Contact Calc | 3.50000, Rep | 3.500(3) | ..... | Senseless s.u. |
| H(10)-N(1)                     | 1.555 4.555  | .....    | #     | 47 Check       |
| PLAT754_ALERT_4_C Contact Calc | 3.42000, Rep | 3.420(4) | ..... | Senseless s.u. |
| H(10)-C(2)                     | 1.555 1.565  | .....    | #     | 47 Check       |
| PLAT754_ALERT_4_C Contact Calc | 3.15000, Rep | 3.152(4) | ..... | Senseless s.u. |
| H(10)-C(3)                     | 1.555 1.565  | .....    | #     | 47 Check       |
| PLAT754_ALERT_4_C Contact Calc | 2.89000, Rep | 2.885(3) | ..... | Senseless s.u. |
| H(10)-C(4)                     | 1.555 1.555  | .....    | #     | 47 Check       |
| PLAT754_ALERT_4_C Contact Calc | 3.39000, Rep | 3.394(3) | ..... | Senseless s.u. |
| H(10)-C(5)                     | 1.555 1.555  | .....    | #     | 47 Check       |
| PLAT754_ALERT_4_C Contact Calc | 3.16000, Rep | 3.160(3) | ..... | Senseless s.u. |
| H(10)-C(10)                    | 1.555 1.555  | .....    | #     | 47 Check       |
| PLAT754_ALERT_4_C Contact Calc | 2.97000, Rep | 2.974(3) | ..... | Senseless s.u. |
| H(10)-C(12)                    | 1.555 1.555  | .....    | #     | 47 Check       |
| PLAT754_ALERT_4_C Contact Calc | 2.04000, Rep | 2.045(4) | ..... | Senseless s.u. |
| H(10)-C(14)                    | 1.555 1.555  | .....    | #     | 47 Check       |
| PLAT754_ALERT_4_C Contact Calc | 2.54000, Rep | 2.539(3) | ..... | Senseless s.u. |
| H(10)-C(15)                    | 1.555 1.555  | .....    | #     | 47 Check       |
| PLAT754_ALERT_4_C Contact Calc | 3.08000, Rep | 3.077(4) | ..... | Senseless s.u. |
| H(10)-H(1)                     | 1.555 1.565  | .....    | #     | 47 Check       |
| PLAT754_ALERT_4_C Contact Calc | 2.55000, Rep | 2.547(4) | ..... | Senseless s.u. |
| H(10)-H(2)                     | 1.555 1.565  | .....    | #     | 47 Check       |
| PLAT754_ALERT_4_C Contact Calc | 3.25000, Rep | 3.251(3) | ..... | Senseless s.u. |
| H(10)-H(3)                     | 1.555 1.555  | .....    | #     | 47 Check       |
| PLAT754_ALERT_4_C Contact Calc | 3.59000, Rep | 3.593(3) | ..... | Senseless s.u. |
| H(10)-H(7)                     | 1.555 1.555  | .....    | #     | 47 Check       |
| PLAT754_ALERT_4_C Contact Calc | 3.57000, Rep | 3.572(3) | ..... | Senseless s.u. |
| H(10)-H(8)                     | 1.555 1.555  | .....    | #     | 47 Check       |
| PLAT754_ALERT_4_C Contact Calc | 1.55000, Rep | 1.551(4) | ..... | Senseless s.u. |
| H(10)-H(9)                     | 1.555 1.555  | .....    | #     | 47 Check       |
| PLAT754_ALERT_4_C Contact Calc | 2.74000, Rep | 2.744(4) | ..... | Senseless s.u. |
| H(10)-H(11)                    | 1.555 1.555  | .....    | #     | 47 Check       |
| PLAT754_ALERT_4_C Contact Calc | 2.76000, Rep | 2.760(3) | ..... | Senseless s.u. |
| H(10)-H(12)                    | 1.555 1.555  | .....    | #     | 47 Check       |
| PLAT754_ALERT_4_C Contact Calc | 2.28000, Rep | 2.275(3) | ..... | Senseless s.u. |
| H(10)-H(13)                    | 1.555 1.555  | .....    | #     | 47 Check       |
| PLAT754_ALERT_4_C Contact Calc | 2.84000, Rep | 2.836(2) | ..... | Senseless s.u. |
| H(11)-O(1)                     | 1.555 1.555  | .....    | #     | 47 Check       |
| PLAT754_ALERT_4_C Contact Calc | 3.43000, Rep | 3.426(3) | ..... | Senseless s.u. |
| H(11)-N(1)                     | 1.555 4.545  | .....    | #     | 47 Check       |
| PLAT754_ALERT_4_C Contact Calc | 3.48000, Rep | 3.484(3) | ..... | Senseless s.u. |
| H(11)-C(1)                     | 1.555 1.555  | .....    | #     | 47 Check       |

|                                |                   |          |       |                |
|--------------------------------|-------------------|----------|-------|----------------|
| PLAT754_ALERT_4_C Contact Calc | 3.17000, Rep      | 3.170(4) | ..... | Senseless s.u. |
| H(11)-C(2)                     | 1.555 1.555 ..... | #        | 47    | Check          |
| PLAT754_ALERT_4_C Contact Calc | 2.53000, Rep      | 2.529(3) | ..... | Senseless s.u. |
| H(11)-C(3)                     | 1.555 1.555 ..... | #        | 47    | Check          |
| PLAT754_ALERT_4_C Contact Calc | 2.07000, Rep      | 2.068(3) | ..... | Senseless s.u. |
| H(11)-C(4)                     | 1.555 1.555 ..... | #        | 47    | Check          |
| PLAT754_ALERT_4_C Contact Calc | 3.31000, Rep      | 3.308(3) | ..... | Senseless s.u. |
| H(11)-C(10)                    | 1.555 1.555 ..... | #        | 47    | Check          |
| PLAT754_ALERT_4_C Contact Calc | 2.67000, Rep      | 2.670(3) | ..... | Senseless s.u. |
| H(11)-C(12)                    | 1.555 1.555 ..... | #        | 47    | Check          |
| PLAT754_ALERT_4_C Contact Calc | 2.04000, Rep      | 2.042(3) | ..... | Senseless s.u. |
| H(11)-C(13)                    | 1.555 1.555 ..... | #        | 47    | Check          |
| PLAT754_ALERT_4_C Contact Calc | 2.03000, Rep      | 2.033(3) | ..... | Senseless s.u. |
| H(11)-C(15)                    | 1.555 1.555 ..... | #        | 47    | Check          |
| PLAT754_ALERT_4_C Contact Calc | 2.90000, Rep      | 2.901(3) | ..... | Senseless s.u. |
| H(11)-C(16)                    | 1.555 1.555 ..... | #        | 47    | Check          |
| PLAT754_ALERT_4_C Contact Calc | 3.36000, Rep      | 3.361(3) | ..... | Senseless s.u. |
| H(11)-C(20)                    | 1.555 2.646 ..... | #        | 47    | Check          |
| PLAT754_ALERT_4_C Contact Calc | 3.57000, Rep      | 3.571(3) | ..... | Senseless s.u. |
| H(11)-C(21)                    | 1.555 4.555 ..... | #        | 47    | Check          |
| PLAT754_ALERT_4_C Contact Calc | 2.94000, Rep      | 2.938(3) | ..... | Senseless s.u. |
| H(11)-H(2)                     | 1.555 1.555 ..... | #        | 47    | Check          |
| PLAT754_ALERT_4_C Contact Calc | 3.58000, Rep      | 3.579(3) | ..... | Senseless s.u. |
| H(11)-H(7)                     | 1.555 1.555 ..... | #        | 47    | Check          |
| PLAT754_ALERT_4_C Contact Calc | 2.66000, Rep      | 2.663(3) | ..... | Senseless s.u. |
| H(11)-H(8)                     | 1.555 1.555 ..... | #        | 47    | Check          |
| PLAT754_ALERT_4_C Contact Calc | 2.20000, Rep      | 2.200(3) | ..... | Senseless s.u. |
| H(11)-H(9)                     | 1.555 1.555 ..... | #        | 47    | Check          |
| PLAT754_ALERT_4_C Contact Calc | 2.74000, Rep      | 2.744(4) | ..... | Senseless s.u. |
| H(11)-H(10)                    | 1.555 1.555 ..... | #        | 47    | Check          |
| PLAT754_ALERT_4_C Contact Calc | 2.25000, Rep      | 2.255(3) | ..... | Senseless s.u. |
| H(11)-H(12)                    | 1.555 1.555 ..... | #        | 47    | Check          |
| PLAT754_ALERT_4_C Contact Calc | 2.76000, Rep      | 2.760(3) | ..... | Senseless s.u. |
| H(11)-H(13)                    | 1.555 1.555 ..... | #        | 47    | Check          |
| PLAT754_ALERT_4_C Contact Calc | 2.81000, Rep      | 2.807(2) | ..... | Senseless s.u. |
| H(11)-H(14)                    | 1.555 1.555 ..... | #        | 47    | Check          |
| PLAT754_ALERT_4_C Contact Calc | 3.40000, Rep      | 3.397(3) | ..... | Senseless s.u. |
| H(12)-C(1)                     | 1.555 1.555 ..... | #        | 47    | Check          |
| PLAT754_ALERT_4_C Contact Calc | 3.39000, Rep      | 3.394(3) | ..... | Senseless s.u. |
| H(12)-C(4)                     | 1.555 1.555 ..... | #        | 47    | Check          |
| PLAT754_ALERT_4_C Contact Calc | 2.79000, Rep      | 2.793(2) | ..... | Senseless s.u. |
| H(12)-C(13)                    | 1.555 1.555 ..... | #        | 47    | Check          |
| PLAT754_ALERT_4_C Contact Calc | 2.03000, Rep      | 2.031(2) | ..... | Senseless s.u. |
| H(12)-C(14)                    | 1.555 1.555 ..... | #        | 47    | Check          |
| PLAT754_ALERT_4_C Contact Calc | 2.04000, Rep      | 2.037(3) | ..... | Senseless s.u. |
| H(12)-C(16)                    | 1.555 1.555 ..... | #        | 47    | Check          |
| PLAT754_ALERT_4_C Contact Calc | 2.66000, Rep      | 2.658(3) | ..... | Senseless s.u. |
| H(12)-C(17)                    | 1.555 1.555 ..... | #        | 47    | Check          |
| PLAT754_ALERT_4_C Contact Calc | 3.51000, Rep      | 3.511(3) | ..... | Senseless s.u. |
| H(12)-C(18)                    | 1.555 1.555 ..... | #        | 47    | Check          |
| PLAT754_ALERT_4_C Contact Calc | 3.08000, Rep      | 3.077(3) | ..... | Senseless s.u. |
| H(12)-C(18)                    | 1.555 2.656 ..... | #        | 47    | Check          |
| PLAT754_ALERT_4_C Contact Calc | 3.11000, Rep      | 3.107(4) | ..... | Senseless s.u. |
| H(12)-C(19)                    | 1.555 2.656 ..... | #        | 47    | Check          |
| PLAT754_ALERT_4_C Contact Calc | 3.41000, Rep      | 3.407(4) | ..... | Senseless s.u. |
| H(12)-C(20)                    | 1.555 2.646 ..... | #        | 47    | Check          |
| PLAT754_ALERT_4_C Contact Calc | 3.55000, Rep      | 3.550(3) | ..... | Senseless s.u. |
| H(12)-C(21)                    | 1.555 2.646 ..... | #        | 47    | Check          |
| PLAT754_ALERT_4_C Contact Calc | 3.23000, Rep      | 3.233(3) | ..... | Senseless s.u. |
| H(12)-C(22)                    | 1.555 1.555 ..... | #        | 47    | Check          |
| PLAT754_ALERT_4_C Contact Calc | 2.97000, Rep      | 2.974(3) | ..... | Senseless s.u. |
| H(12)-H(9)                     | 1.555 1.555 ..... | #        | 47    | Check          |

|                                |              |          |       |                |
|--------------------------------|--------------|----------|-------|----------------|
| PLAT754_ALERT_4_C Contact Calc | 2.76000, Rep | 2.760(3) | ..... | Senseless s.u. |
| H(12)-H(10)                    | 1.555        | 1.555    | ..... | # 47 Check     |
| PLAT754_ALERT_4_C Contact Calc | 2.25000, Rep | 2.255(3) | ..... | Senseless s.u. |
| H(12)-H(11)                    | 1.555        | 1.555    | ..... | # 47 Check     |
| PLAT754_ALERT_4_C Contact Calc | 1.55000, Rep | 1.551(3) | ..... | Senseless s.u. |
| H(12)-H(13)                    | 1.555        | 1.555    | ..... | # 47 Check     |
| PLAT754_ALERT_4_C Contact Calc | 2.25000, Rep | 2.253(3) | ..... | Senseless s.u. |
| H(12)-H(14)                    | 1.555        | 1.555    | ..... | # 47 Check     |
| PLAT754_ALERT_4_C Contact Calc | 2.82000, Rep | 2.815(3) | ..... | Senseless s.u. |
| H(13)-C(1)                     | 1.555        | 1.555    | ..... | # 47 Check     |
| PLAT754_ALERT_4_C Contact Calc | 3.48000, Rep | 3.477(3) | ..... | Senseless s.u. |
| H(13)-C(2)                     | 1.555        | 1.565    | ..... | # 47 Check     |
| PLAT754_ALERT_4_C Contact Calc | 2.83000, Rep | 2.827(3) | ..... | Senseless s.u. |
| H(13)-C(4)                     | 1.555        | 1.555    | ..... | # 47 Check     |
| PLAT754_ALERT_4_C Contact Calc | 3.44000, Rep | 3.441(3) | ..... | Senseless s.u. |
| H(13)-C(5)                     | 1.555        | 1.555    | ..... | # 47 Check     |
| PLAT754_ALERT_4_C Contact Calc | 3.47000, Rep | 3.471(3) | ..... | Senseless s.u. |
| H(13)-C(8)                     | 1.555        | 1.555    | ..... | # 47 Check     |
| PLAT754_ALERT_4_C Contact Calc | 2.64000, Rep | 2.641(3) | ..... | Senseless s.u. |
| H(13)-C(9)                     | 1.555        | 1.555    | ..... | # 47 Check     |
| PLAT754_ALERT_4_C Contact Calc | 2.63000, Rep | 2.632(3) | ..... | Senseless s.u. |
| H(13)-C(10)                    | 1.555        | 1.555    | ..... | # 47 Check     |
| PLAT754_ALERT_4_C Contact Calc | 2.61000, Rep | 2.613(3) | ..... | Senseless s.u. |
| H(13)-C(13)                    | 1.555        | 1.555    | ..... | # 47 Check     |
| PLAT754_ALERT_4_C Contact Calc | 2.01000, Rep | 2.010(3) | ..... | Senseless s.u. |
| H(13)-C(14)                    | 1.555        | 1.555    | ..... | # 47 Check     |
| PLAT754_ALERT_4_C Contact Calc | 2.01000, Rep | 2.013(3) | ..... | Senseless s.u. |
| H(13)-C(16)                    | 1.555        | 1.555    | ..... | # 47 Check     |
| PLAT754_ALERT_4_C Contact Calc | 2.60000, Rep | 2.599(3) | ..... | Senseless s.u. |
| H(13)-C(17)                    | 1.555        | 1.555    | ..... | # 47 Check     |
| PLAT754_ALERT_4_C Contact Calc | 2.67000, Rep | 2.668(3) | ..... | Senseless s.u. |
| H(13)-C(22)                    | 1.555        | 1.555    | ..... | # 47 Check     |
| PLAT754_ALERT_4_C Contact Calc | 2.68000, Rep | 2.683(3) | ..... | Senseless s.u. |
| H(13)-H(1)                     | 1.555        | 1.565    | ..... | # 47 Check     |
| PLAT754_ALERT_4_C Contact Calc | 3.22000, Rep | 3.222(3) | ..... | Senseless s.u. |
| H(13)-H(9)                     | 1.555        | 1.555    | ..... | # 47 Check     |
| PLAT754_ALERT_4_C Contact Calc | 2.28000, Rep | 2.275(3) | ..... | Senseless s.u. |
| H(13)-H(10)                    | 1.555        | 1.555    | ..... | # 47 Check     |
| PLAT754_ALERT_4_C Contact Calc | 2.76000, Rep | 2.760(3) | ..... | Senseless s.u. |
| H(13)-H(11)                    | 1.555        | 1.555    | ..... | # 47 Check     |
| PLAT754_ALERT_4_C Contact Calc | 1.55000, Rep | 1.551(3) | ..... | Senseless s.u. |
| H(13)-H(12)                    | 1.555        | 1.555    | ..... | # 47 Check     |
| PLAT754_ALERT_4_C Contact Calc | 2.75000, Rep | 2.751(3) | ..... | Senseless s.u. |
| H(13)-H(14)                    | 1.555        | 1.555    | ..... | # 47 Check     |
| PLAT754_ALERT_4_C Contact Calc | 2.07000, Rep | 2.075(3) | ..... | Senseless s.u. |
| H(14)-C(1)                     | 1.555        | 1.555    | ..... | # 47 Check     |
| PLAT754_ALERT_4_C Contact Calc | 2.51000, Rep | 2.514(3) | ..... | Senseless s.u. |
| H(14)-C(2)                     | 1.555        | 1.555    | ..... | # 47 Check     |
| PLAT754_ALERT_4_C Contact Calc | 3.17000, Rep | 3.176(2) | ..... | Senseless s.u. |
| H(14)-C(3)                     | 1.555        | 1.555    | ..... | # 47 Check     |
| PLAT754_ALERT_4_C Contact Calc | 3.46000, Rep | 3.465(2) | ..... | Senseless s.u. |
| H(14)-C(4)                     | 1.555        | 1.555    | ..... | # 47 Check     |
| PLAT754_ALERT_4_C Contact Calc | 3.31000, Rep | 3.314(3) | ..... | Senseless s.u. |
| H(14)-C(9)                     | 1.555        | 1.555    | ..... | # 47 Check     |
| PLAT754_ALERT_4_C Contact Calc | 2.82000, Rep | 2.819(3) | ..... | Senseless s.u. |
| H(14)-C(11)                    | 1.555        | 1.555    | ..... | # 47 Check     |
| PLAT754_ALERT_4_C Contact Calc | 2.85000, Rep | 2.852(3) | ..... | Senseless s.u. |
| H(14)-C(14)                    | 1.555        | 1.555    | ..... | # 47 Check     |
| PLAT754_ALERT_4_C Contact Calc | 2.02000, Rep | 2.017(3) | ..... | Senseless s.u. |
| H(14)-C(15)                    | 1.555        | 1.555    | ..... | # 47 Check     |
| PLAT754_ALERT_4_C Contact Calc | 2.02000, Rep | 2.022(3) | ..... | Senseless s.u. |
| H(14)-C(17)                    | 1.555        | 1.555    | ..... | # 47 Check     |



|                                |              |          |       |                |
|--------------------------------|--------------|----------|-------|----------------|
| PLAT754_ALERT_4_C Contact Calc | 2.52000, Rep | 2.520(3) | ..... | Senseless s.u. |
| H(14)-C(18)                    | 1.555        | 1.555    | ..... | # 47 Check     |
| PLAT754_ALERT_4_C Contact Calc | 3.18000, Rep | 3.178(4) | ..... | Senseless s.u. |
| H(14)-C(19)                    | 1.555        | 2.646    | ..... | # 47 Check     |
| PLAT754_ALERT_4_C Contact Calc | 3.16000, Rep | 3.161(4) | ..... | Senseless s.u. |
| H(14)-C(20)                    | 1.555        | 2.646    | ..... | # 47 Check     |
| PLAT754_ALERT_4_C Contact Calc | 3.29000, Rep | 3.288(3) | ..... | Senseless s.u. |
| H(14)-C(22)                    | 1.555        | 1.555    | ..... | # 47 Check     |
| PLAT754_ALERT_4_C Contact Calc | 2.91000, Rep | 2.905(3) | ..... | Senseless s.u. |
| H(14)-H(1)                     | 1.555        | 1.555    | ..... | # 47 Check     |
| PLAT754_ALERT_4_C Contact Calc | 2.81000, Rep | 2.807(2) | ..... | Senseless s.u. |
| H(14)-H(11)                    | 1.555        | 1.555    | ..... | # 47 Check     |
| PLAT754_ALERT_4_C Contact Calc | 2.25000, Rep | 2.253(3) | ..... | Senseless s.u. |
| H(14)-H(12)                    | 1.555        | 1.555    | ..... | # 47 Check     |
| PLAT754_ALERT_4_C Contact Calc | 2.75000, Rep | 2.751(3) | ..... | Senseless s.u. |
| H(14)-H(13)                    | 1.555        | 1.555    | ..... | # 47 Check     |

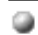

### Alert level G

CHEMS02\_ALERT\_1\_G Please check that you have entered the correct  
 \_publ\_requested\_category classification of your compound;  
 FI or CI or EI for inorganic; FM or CM or EM for metal-organic;  
 FO or CO or EO for organic.  
 From the CIF: \_publ\_requested\_category CHOOSE FI FM FO CI CM CO or  
 From the CIF: \_chemical\_formula\_sum:C22 H19 N1 O1

PLAT005\_ALERT\_5\_G No Embedded Refinement Details found in the CIF Please Do !

PLAT063\_ALERT\_4\_G Crystal Size Likely too Large for Beam Size .... 1.00 mm

PLAT200\_ALERT\_1\_G Reported \_diffrn\_ambient\_temperature .... (K) 293 Check

PLAT710\_ALERT\_4\_G Delete 1-2-3 or 2-3-4 Linear Torsion Angle ... # 6 Do !  
 C(2)-C(1)-C(11-N(1)) 50.00 7.00 1.555 1.555 1.555 1.555

PLAT710\_ALERT\_4\_G Delete 1-2-3 or 2-3-4 Linear Torsion Angle ... # 11 Do !  
 C(9)-C(1)-C(11-N(1)) 169.00 7.00 1.555 1.555 1.555 1.555

PLAT710\_ALERT\_4\_G Delete 1-2-3 or 2-3-4 Linear Torsion Angle ... # 20 Do !  
 C(16-C(1)-C(11-N(1)) -68.00 7.00 1.555 1.555 1.555 1.555

PLAT793\_ALERT\_4\_G The Model has Chirality at C1 (Centro SPGR) S Verify

PLAT793\_ALERT\_4\_G The Model has Chirality at C4 (Centro SPGR) S Verify

PLAT793\_ALERT\_4\_G The Model has Chirality at C14 (Centro SPGR) S Verify

PLAT793\_ALERT\_4\_G The Model has Chirality at C16 (Centro SPGR) S Verify

PLAT882\_ALERT\_1\_G Missing datum for \_diffrn\_reflns\_av\_unetI/netI ..... Please Check

---

0 **ALERT level A** = Most likely a serious problem - resolve or explain  
 1 **ALERT level B** = A potentially serious problem, consider carefully  
 470 **ALERT level C** = Check. Ensure it is not caused by an omission or oversight  
 12 **ALERT level G** = General information/check it is not something unexpected

6 ALERT type 1 CIF construction/syntax error, inconsistent or missing data  
 4 ALERT type 2 Indicator that the structure model may be wrong or deficient  
 1 ALERT type 3 Indicator that the structure quality may be low  
 471 ALERT type 4 Improvement, methodology, query or suggestion  
 1 ALERT type 5 Informative message, check

---

It is advisable to attempt to resolve as many as possible of the alerts in all categories. Often the minor alerts point to easily fixed oversights, errors and omissions in your CIF or refinement strategy, so attention to these fine details can be worthwhile. In order to resolve some of the more serious problems it may be necessary to carry out additional measurements or structure refinements. However, the purpose of your study may justify the reported deviations and the more serious of these should normally be commented upon in the discussion or experimental section of a paper or in the "special\_details" fields of the CIF. checkCIF was carefully designed to identify outliers and unusual parameters, but every test has its limitations and alerts that are not important in a particular case may appear. Conversely, the absence of alerts does not guarantee there are no aspects of the results needing attention. It is up to the individual to critically assess their own results and, if necessary, seek expert advice.

### **Publication of your CIF in IUCr journals**

A basic structural check has been run on your CIF. These basic checks will be run on all CIFs submitted for publication in IUCr journals (*Acta Crystallographica*, *Journal of Applied Crystallography*, *Journal of Synchrotron Radiation*); however, if you intend to submit to *Acta Crystallographica Section C* or *E* or *IUCrData*, you should make sure that full publication checks are run on the final version of your CIF prior to submission.

### **Publication of your CIF in other journals**

Please refer to the *Notes for Authors* of the relevant journal for any special instructions relating to CIF submission.

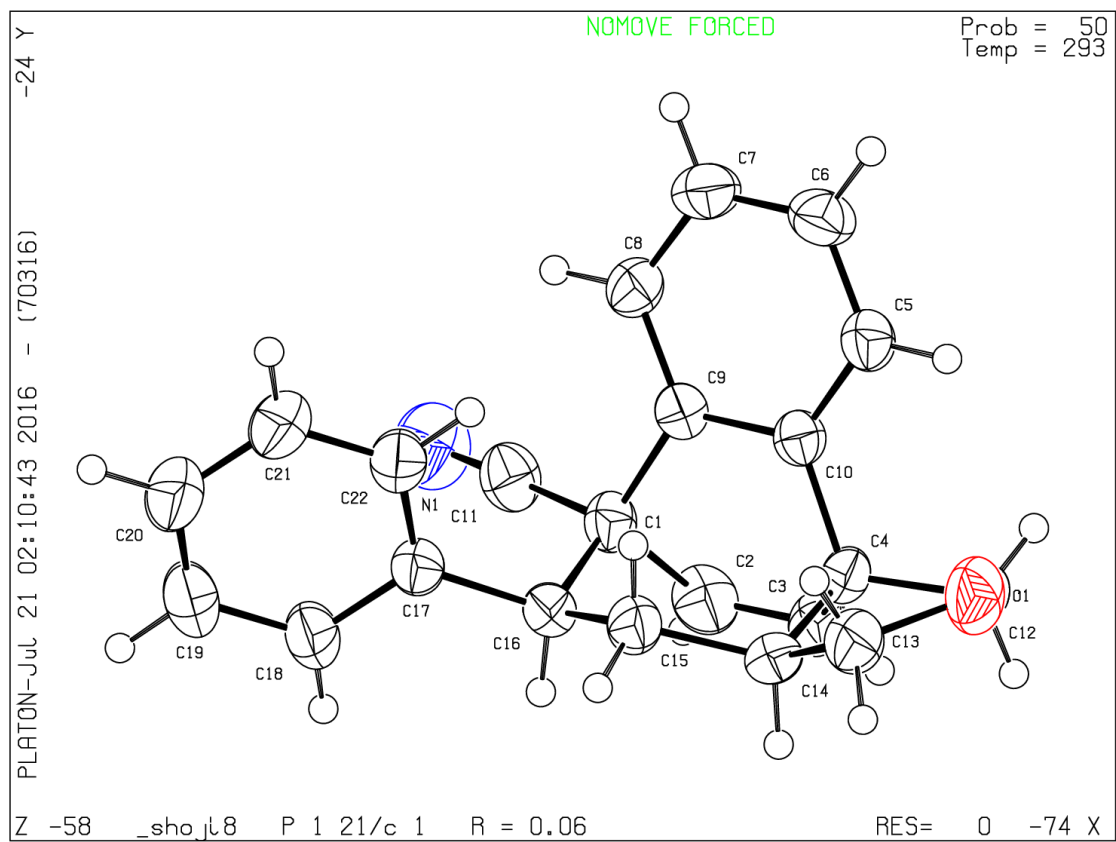

Supplement: Supplementary file 6 [file 5906367]
