# Supplementary material
Source: publisher figshare collection journal article supplement (https://acs.figshare.com/ndownloader/files/5906367)

# checkCIF/PLATON report

You have not supplied any structure factors. As a result the full set of tests cannot be run.

THIS REPORT IS FOR GUIDANCE ONLY. IF USED AS PART OF A REVIEW PROCEDURE FOR PUBLICATION, IT SHOULD NOT REPLACE THE EXPERTISE OF AN EXPERIENCED CRYSTALLOGRAPHIC REFEREE.

No syntax errors found.      CIF dictionary      Interpreting this report

## Datablock: shoji04

---

|                 |                |                    |             |
|-----------------|----------------|--------------------|-------------|
| Bond precision: | C-C = 0.0157 A | Wavelength=0.71075 |             |
| Cell:           | a=11.1593(16)  | b=9.9827(16)       | c=30.073(4) |
|                 | alpha=90       | beta=95.774(3)     | gamma=90    |
| Temperature:    | 296 K          |                    |             |
|                 | Calculated     | Reported           |             |
| Volume          | 3333.1(8)      | 3333.1(9)          |             |
| Space group     | C c            | C 1 c 1            |             |
| Hall group      | C -2yc         | C -2yc             |             |
| Moiety formula  | C22 H19 N O    | C22 H19 N O        |             |
| Sum formula     | C22 H19 N O    | C22 H19 N O        |             |
| Mr              | 313.38         | 313.40             |             |
| Dx,g cm-3       | 1.249          | 1.249              |             |
| Z               | 8              | 8                  |             |
| Mu (mm-1)       | 0.076          | 0.076              |             |
| F000            | 1328.0         | 1328.0             |             |
| F000'           | 1328.52        |                    |             |
| h,k,lmax        | 14,12,38       | 14,12,38           |             |
| Nref            | 7574[ 3790]    | 6901               |             |
| Tmin,Tmax       | 0.973,0.985    | 0.985,0.985        |             |
| Tmin'           | 0.970          |                    |             |

Correction method= # Reported T Limits: Tmin=0.985 Tmax=0.985  
AbsCorr = NONE

Data completeness= 1.82/0.91      Theta(max)= 27.395

R(reflections)= 0.0937( 3167)      wR2(reflections)= 0.3157( 6901)

S = 1.288      Npar= 433

---

The following ALERTS were generated. Each ALERT has the format

**test-name\_ALERT\_alert-type\_alert-level.**

Click on the hyperlinks for more details of the test.

---

**Alert level B**

PLAT340\_ALERT\_3\_B Low Bond Precision on C-C Bonds ..... 0.01568 Ang.

---

**Alert level C**

ABSTY03\_ALERT\_1\_C The \_exptl\_absorpt\_correction\_type has been given as none.  
However values have been given for Tmin and Tmax. Remove  
these if an absorption correction has not been applied.  
From the CIF: \_exptl\_absorpt\_correction\_T\_min 0.985  
From the CIF: \_exptl\_absorpt\_correction\_T\_max 0.985  
RFACR01\_ALERT\_3\_C The value of the weighted R factor is > 0.25  
Weighted R factor given 0.316  
STRVA01\_ALERT\_2\_C Chirality of atom sites is inverted?  
From the CIF: \_refine\_ls\_abs\_structure\_Flack 2.600  
From the CIF: \_refine\_ls\_abs\_structure\_Flack\_su 1.000  
PLAT026\_ALERT\_3\_C Ratio Observed / Unique Reflections (too) Low .. 46 %  
PLAT084\_ALERT\_3\_C High wR2 Value (i.e. > 0.25) ..... 0.32 Report  
PLAT085\_ALERT\_2\_C SHELXL default weighting scheme is not optimized Please Check  
PLAT234\_ALERT\_4\_C Large Hirshfeld Difference C3 -- C42 .. 0.18 Ang.  
PLAT234\_ALERT\_4\_C Large Hirshfeld Difference C4 -- C7 .. 0.16 Ang.  
PLAT234\_ALERT\_4\_C Large Hirshfeld Difference C18 -- C33 .. 0.19 Ang.  
PLAT234\_ALERT\_4\_C Large Hirshfeld Difference C20 -- C38 .. 0.18 Ang.  
PLAT234\_ALERT\_4\_C Large Hirshfeld Difference C28 -- C37 .. 0.17 Ang.  
PLAT234\_ALERT\_4\_C Large Hirshfeld Difference C6 -- C29 .. 0.17 Ang.  
PLAT234\_ALERT\_4\_C Large Hirshfeld Difference C30 -- C48 .. 0.17 Ang.  
PLAT234\_ALERT\_4\_C Large Hirshfeld Difference C31 -- C43 .. 0.22 Ang.  
PLAT234\_ALERT\_4\_C Large Hirshfeld Difference C39 -- C44 .. 0.16 Ang.  
PLAT241\_ALERT\_2\_C High 'MainMol' Ueq as Compared to Neighbors of C38 Check  
PLAT241\_ALERT\_2\_C High 'MainMol' Ueq as Compared to Neighbors of C47 Check  
PLAT242\_ALERT\_2\_C Low 'MainMol' Ueq as Compared to Neighbors of C31 Check  
PLAT790\_ALERT\_4\_C Centre of Gravity not Within Unit Cell: Resd. # 1 Note  
C22 H19 N O  
PLAT907\_ALERT\_2\_C Flack x > 0.5, Structure needs to be Inverted? . 2.60 Check

---

**Alert level G**

CHEMS02\_ALERT\_1\_G Please check that you have entered the correct  
\_publ\_requested\_category classification of your compound;  
FI or CI or EI for inorganic; FM or CM or EM for metal-organic;  
FO or CO or EO for organic.  
From the CIF: \_publ\_requested\_category CHOOSE FI FM FO CI CM CO or  
From the CIF: \_chemical\_formula\_sum:C22 H19 N1 O1  
PLAT005\_ALERT\_5\_G No Embedded Refinement Details found in the CIF Please Do !  
PLAT032\_ALERT\_4\_G Std. Uncertainty on Flack Parameter Value High . 1.000 Report  
PLAT792\_ALERT\_1\_G The Model has Chirality at C4 (Polar SPGR) S Verify  
PLAT792\_ALERT\_1\_G The Model has Chirality at C6 (Polar SPGR) S Verify  
PLAT792\_ALERT\_1\_G The Model has Chirality at C7 (Polar SPGR) R Verify  
PLAT792\_ALERT\_1\_G The Model has Chirality at C14 (Polar SPGR) R Verify  
PLAT792\_ALERT\_1\_G The Model has Chirality at C22 (Polar SPGR) R Verify  
PLAT792\_ALERT\_1\_G The Model has Chirality at C23 (Polar SPGR) S Verify  
PLAT792\_ALERT\_1\_G The Model has Chirality at C24 (Polar SPGR) S Verify  
PLAT792\_ALERT\_1\_G The Model has Chirality at C25 (Polar SPGR) R Verify  
PLAT882\_ALERT\_1\_G Missing datum for \_diffn\_reflms\_av\_unetI/netI ..... Please Check

---

- 0 **ALERT level A** = Most likely a serious problem - resolve or explain  
1 **ALERT level B** = A potentially serious problem, consider carefully  
20 **ALERT level C** = Check. Ensure it is not caused by an omission or oversight  
12 **ALERT level G** = General information/check it is not something unexpected

11 ALERT type 1 CIF construction/syntax error, inconsistent or missing data

6 ALERT type 2 Indicator that the structure model may be wrong or deficient  
4 ALERT type 3 Indicator that the structure quality may be low  
11 ALERT type 4 Improvement, methodology, query or suggestion  
1 ALERT type 5 Informative message, check

---

---

It is advisable to attempt to resolve as many as possible of the alerts in all categories. Often the minor alerts point to easily fixed oversights, errors and omissions in your CIF or refinement strategy, so attention to these fine details can be worthwhile. In order to resolve some of the more serious problems it may be necessary to carry out additional measurements or structure refinements. However, the purpose of your study may justify the reported deviations and the more serious of these should normally be commented upon in the discussion or experimental section of a paper or in the "special\_details" fields of the CIF. checkCIF was carefully designed to identify outliers and unusual parameters, but every test has its limitations and alerts that are not important in a particular case may appear. Conversely, the absence of alerts does not guarantee there are no aspects of the results needing attention. It is up to the individual to critically assess their own results and, if necessary, seek expert advice.

### **Publication of your CIF in IUCr journals**

A basic structural check has been run on your CIF. These basic checks will be run on all CIFs submitted for publication in IUCr journals (*Acta Crystallographica*, *Journal of Applied Crystallography*, *Journal of Synchrotron Radiation*); however, if you intend to submit to *Acta Crystallographica Section C* or *E* or *IUCrData*, you should make sure that full publication checks are run on the final version of your CIF prior to submission.

### **Publication of your CIF in other journals**

Please refer to the *Notes for Authors* of the relevant journal for any special instructions relating to CIF submission.

---

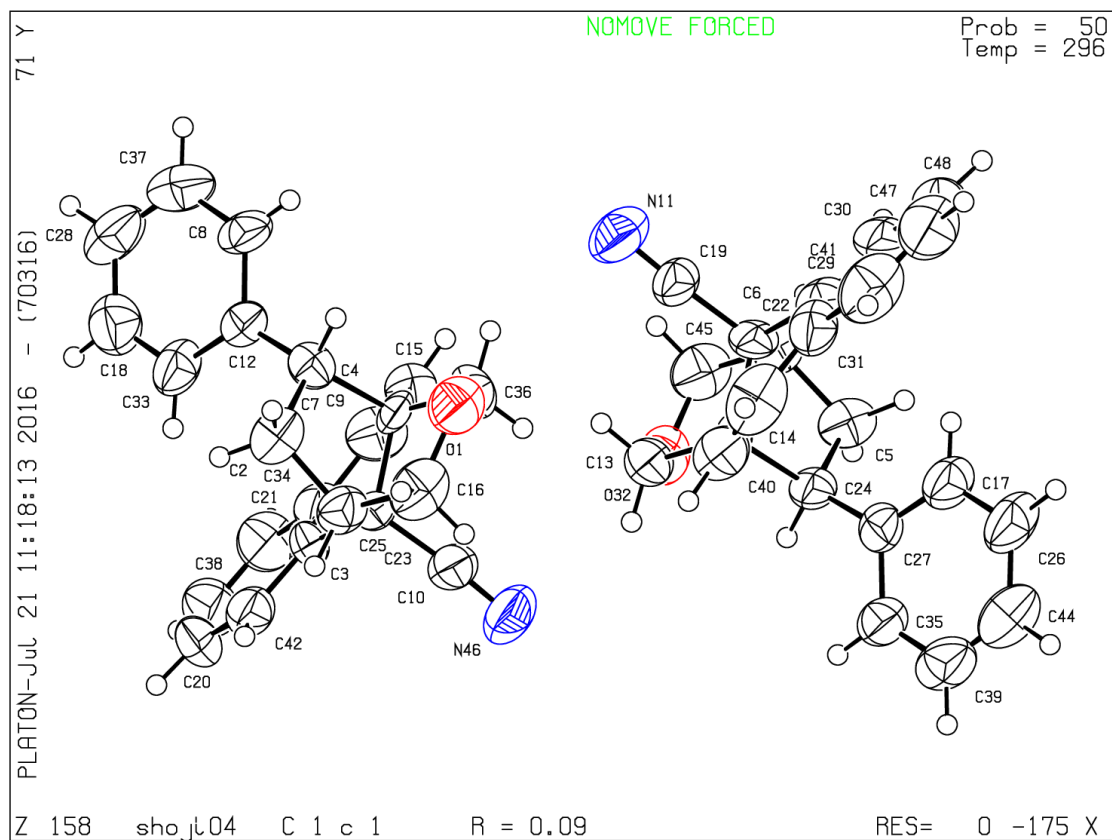

Supplement: Supplementary file 7 [file 5906367]
