# Supplementary material
Source: publisher figshare collection journal article supplement (https://acs.figshare.com/ndownloader/files/5906367)

# checkCIF/PLATON report

You have not supplied any structure factors. As a result the full set of tests cannot be run.

THIS REPORT IS FOR GUIDANCE ONLY. IF USED AS PART OF A REVIEW PROCEDURE FOR PUBLICATION, IT SHOULD NOT REPLACE THE EXPERTISE OF AN EXPERIENCED CRYSTALLOGRAPHIC REFEREE.

No syntax errors found.      CIF dictionary      Interpreting this report

## Datablock: \_shoji7

---

|                 |                |                    |             |
|-----------------|----------------|--------------------|-------------|
| Bond precision: | C-C = 0.0048 A | Wavelength=0.71075 |             |
| Cell:           | a=15.2555(13)  | b=10.9576(8)       | c=21.576(2) |
|                 | alpha=90       | beta=110.768(3)    | gamma=90    |
| Temperature:    | 293 K          |                    |             |
|                 | Calculated     | Reported           |             |
| Volume          | 3372.4(5)      | 3372.4(5)          |             |
| Space group     | P 21/c         | P 1 21/c 1         |             |
| Hall group      | -P 2ybc        | -P 2ybc            |             |
| Moiety formula  | C22 H19 N O    | C22 H19 N O        |             |
| Sum formula     | C22 H19 N O    | C22 H19 N O        |             |
| Mr              | 313.38         | 313.40             |             |
| Dx,g cm-3       | 1.235          | 1.234              |             |
| Z               | 8              | 8                  |             |
| Mu (mm-1)       | 0.075          | 0.075              |             |
| F000            | 1328.0         | 1328.0             |             |
| F000'           | 1328.52        |                    |             |
| h,k,lmax        | 19,14,28       | 19,14,27           |             |
| Nref            | 7721           | 7555               |             |
| Tmin,Tmax       | 0.914,0.956    |                    |             |
| Tmin'           | 0.914          |                    |             |

Correction method= Not given

Data completeness= 0.979      Theta(max)= 27.480

R(reflections)= 0.0731( 3918)      wR2(reflections)= wR= 0.0907( 4355)

S = 1.133      Npar= 471

---

The following ALERTS were generated. Each ALERT has the format

**test-name\_ALERT\_alert-type\_alert-level.**

Click on the hyperlinks for more details of the test.

---

### Alert level B

CRYSS02\_ALERT\_3\_B The value of \_exptl\_crystal\_size\_mid is > 0.8  
Mid crystal size given = 1.200  
CRYSS02\_ALERT\_3\_B The value of \_exptl\_crystal\_size\_max is > 1.0  
Maximum crystal size given = 1.200

---

### Alert level C

REFNR01\_ALERT\_3\_C Ratio of reflections to parameters is < 10 for a  
centrosymmetric structure

sine(theta)/lambda 0.6492

Proportion of unique data used 0.5764

Ratio reflections to parameters 9.2463

PLAT029\_ALERT\_3\_C \_diffn\_measured\_fraction\_theta\_full value Low . 0.979 Note  
PLAT193\_ALERT\_1\_C Cell and Diffraction Temperatures Differ by .... 3 Degree  
PLAT340\_ALERT\_3\_C Low Bond Precision on C-C Bonds ..... 0.00478 Ang.  
PLAT751\_ALERT\_4\_C Bond Calc 0.95000, Rep 0.950(6) ..... Senseless s.u.  
C(3) -H(1) 1.555 1.555 ..... # 57 Check  
PLAT751\_ALERT\_4\_C Bond Calc 0.95000, Rep 0.950(7) ..... Senseless s.u.  
C(4) -H(2) 1.555 1.555 ..... # 58 Check  
PLAT751\_ALERT\_4\_C Bond Calc 0.95000, Rep 0.950(6) ..... Senseless s.u.  
C(5) -H(3) 1.555 1.555 ..... # 59 Check  
PLAT751\_ALERT\_4\_C Bond Calc 0.95000, Rep 0.950(5) ..... Senseless s.u.  
C(6) -H(4) 1.555 1.555 ..... # 60 Check  
PLAT751\_ALERT\_4\_C Bond Calc 0.95000, Rep 0.950(6) ..... Senseless s.u.  
C(7) -H(5) 1.555 1.555 ..... # 61 Check  
PLAT751\_ALERT\_4\_C Bond Calc 0.95000, Rep 0.950(6) ..... Senseless s.u.  
C(8) -H(6) 1.555 1.555 ..... # 62 Check  
PLAT751\_ALERT\_4\_C Bond Calc 0.95000, Rep 0.950(4) ..... Senseless s.u.  
C(12) -H(7) 1.555 1.555 ..... # 63 Check  
PLAT751\_ALERT\_4\_C Bond Calc 0.95000, Rep 0.950(5) ..... Senseless s.u.  
C(12) -H(8) 1.555 1.555 ..... # 64 Check  
PLAT751\_ALERT\_4\_C Bond Calc 0.95000, Rep 0.950(6) ..... Senseless s.u.  
C(13) -H(9) 1.555 1.555 ..... # 65 Check  
PLAT751\_ALERT\_4\_C Bond Calc 0.95000, Rep 0.950(4) ..... Senseless s.u.  
C(13) -H(10) 1.555 1.555 ..... # 66 Check  
PLAT751\_ALERT\_4\_C Bond Calc 0.95000, Rep 0.950(5) ..... Senseless s.u.  
C(14) -H(11) 1.555 1.555 ..... # 67 Check  
PLAT751\_ALERT\_4\_C Bond Calc 0.95000, Rep 0.950(4) ..... Senseless s.u.  
C(15) -H(12) 1.555 1.555 ..... # 68 Check  
PLAT751\_ALERT\_4\_C Bond Calc 0.95000, Rep 0.950(4) ..... Senseless s.u.  
C(15) -H(13) 1.555 1.555 ..... # 69 Check  
PLAT751\_ALERT\_4\_C Bond Calc 0.95000, Rep 0.950(4) ..... Senseless s.u.  
C(16) -H(14) 1.555 1.555 ..... # 70 Check  
PLAT751\_ALERT\_4\_C Bond Calc 0.95000, Rep 0.950(5) ..... Senseless s.u.  
C(18) -H(15) 1.555 1.555 ..... # 71 Check  
PLAT751\_ALERT\_4\_C Bond Calc 0.95000, Rep 0.950(6) ..... Senseless s.u.  
C(19) -H(16) 1.555 1.555 ..... # 72 Check  
PLAT751\_ALERT\_4\_C Bond Calc 0.95000, Rep 0.950(5) ..... Senseless s.u.  
C(20) -H(17) 1.555 1.555 ..... # 73 Check  
PLAT751\_ALERT\_4\_C Bond Calc 0.95000, Rep 0.950(5) ..... Senseless s.u.  
C(21) -H(18) 1.555 1.555 ..... # 74 Check  
PLAT751\_ALERT\_4\_C Bond Calc 0.95000, Rep 0.950(5) ..... Senseless s.u.  
C(22) -H(19) 1.555 1.555 ..... # 75 Check  
PLAT751\_ALERT\_4\_C Bond Calc 0.95000, Rep 0.950(6) ..... Senseless s.u.  
C(25) -H(20) 1.555 1.555 ..... # 76 Check  
PLAT751\_ALERT\_4\_C Bond Calc 0.95000, Rep 0.950(5) ..... Senseless s.u.  
C(26) -H(21) 1.555 1.555 ..... # 77 Check  
PLAT751\_ALERT\_4\_C Bond Calc 0.95000, Rep 0.950(5) ..... Senseless s.u.  
C(27) -H(22) 1.555 1.555 ..... # 78 Check  
PLAT751\_ALERT\_4\_C Bond Calc 0.95000, Rep 0.950(5) ..... Senseless s.u.

|                              |          |       |            |       |                |
|------------------------------|----------|-------|------------|-------|----------------|
| C(28)-H(23)                  | 1.555    | 1.555 | .....      | #     | 79 Check       |
| PLAT751_ALERT_4_C Bond Calc  | 0.95000, | Rep   | 0.950(6)   | ..... | Senseless s.u. |
| C(29)-H(24)                  | 1.555    | 1.555 | .....      | #     | 80 Check       |
| PLAT751_ALERT_4_C Bond Calc  | 0.95000, | Rep   | 0.950(4)   | ..... | Senseless s.u. |
| C(30)-H(25)                  | 1.555    | 1.555 | .....      | #     | 81 Check       |
| PLAT751_ALERT_4_C Bond Calc  | 0.95000, | Rep   | 0.950(5)   | ..... | Senseless s.u. |
| C(34)-H(26)                  | 1.555    | 1.555 | .....      | #     | 82 Check       |
| PLAT751_ALERT_4_C Bond Calc  | 0.95000, | Rep   | 0.950(5)   | ..... | Senseless s.u. |
| C(34)-H(27)                  | 1.555    | 1.555 | .....      | #     | 83 Check       |
| PLAT751_ALERT_4_C Bond Calc  | 0.95000, | Rep   | 0.950(5)   | ..... | Senseless s.u. |
| C(35)-H(28)                  | 1.555    | 1.555 | .....      | #     | 84 Check       |
| PLAT751_ALERT_4_C Bond Calc  | 0.95000, | Rep   | 0.950(5)   | ..... | Senseless s.u. |
| C(35)-H(29)                  | 1.555    | 1.555 | .....      | #     | 85 Check       |
| PLAT751_ALERT_4_C Bond Calc  | 0.95000, | Rep   | 0.950(5)   | ..... | Senseless s.u. |
| C(36)-H(30)                  | 1.555    | 1.555 | .....      | #     | 86 Check       |
| PLAT751_ALERT_4_C Bond Calc  | 0.95000, | Rep   | 0.950(6)   | ..... | Senseless s.u. |
| C(37)-H(31)                  | 1.555    | 1.555 | .....      | #     | 87 Check       |
| PLAT751_ALERT_4_C Bond Calc  | 0.95000, | Rep   | 0.950(4)   | ..... | Senseless s.u. |
| C(37)-H(32)                  | 1.555    | 1.555 | .....      | #     | 88 Check       |
| PLAT752_ALERT_4_C Angle Calc | 120.00,  | Rep   | 119.4(4)   | ..... | Senseless s.u. |
| C(2) -C(3) -H(1)             | 1.555    | 1.555 | 1.555 .... | #     | 87 Check       |
| PLAT752_ALERT_4_C Angle Calc | 119.00,  | Rep   | 119.2(5)   | ..... | Senseless s.u. |
| C(4) -C(3) -H(1)             | 1.555    | 1.555 | 1.555 .... | #     | 88 Check       |
| PLAT752_ALERT_4_C Angle Calc | 120.00,  | Rep   | 119.4(5)   | ..... | Senseless s.u. |
| C(3) -C(4) -H(2)             | 1.555    | 1.555 | 1.555 .... | #     | 89 Check       |
| PLAT752_ALERT_4_C Angle Calc | 119.00,  | Rep   | 118.7(4)   | ..... | Senseless s.u. |
| C(10)-C(4) -H(2)             | 1.555    | 1.555 | 1.555 .... | #     | 90 Check       |
| PLAT752_ALERT_4_C Angle Calc | 120.00,  | Rep   | 120.1(4)   | ..... | Senseless s.u. |
| C(6) -C(5) -H(3)             | 1.555    | 1.555 | 1.555 .... | #     | 91 Check       |
| PLAT752_ALERT_4_C Angle Calc | 119.00,  | Rep   | 119.1(5)   | ..... | Senseless s.u. |
| C(10)-C(5) -H(3)             | 1.555    | 1.555 | 1.555 .... | #     | 92 Check       |
| PLAT752_ALERT_4_C Angle Calc | 119.00,  | Rep   | 119.3(6)   | ..... | Senseless s.u. |
| C(5) -C(6) -H(4)             | 1.555    | 1.555 | 1.555 .... | #     | 93 Check       |
| PLAT752_ALERT_4_C Angle Calc | 121.00,  | Rep   | 120.5(5)   | ..... | Senseless s.u. |
| C(7) -C(6) -H(4)             | 1.555    | 1.555 | 1.555 .... | #     | 94 Check       |
| PLAT752_ALERT_4_C Angle Calc | 120.00,  | Rep   | 120.4(4)   | ..... | Senseless s.u. |
| C(6) -C(7) -H(5)             | 1.555    | 1.555 | 1.555 .... | #     | 95 Check       |
| PLAT752_ALERT_4_C Angle Calc | 120.00,  | Rep   | 119.7(5)   | ..... | Senseless s.u. |
| C(8) -C(7) -H(5)             | 1.555    | 1.555 | 1.555 .... | #     | 96 Check       |
| PLAT752_ALERT_4_C Angle Calc | 121.00,  | Rep   | 121.0(4)   | ..... | Senseless s.u. |
| C(7) -C(8) -H(6)             | 1.555    | 1.555 | 1.555 .... | #     | 97 Check       |
| PLAT752_ALERT_4_C Angle Calc | 118.00,  | Rep   | 118.3(3)   | ..... | Senseless s.u. |
| C(9) -C(8) -H(6)             | 1.555    | 1.555 | 1.555 .... | #     | 98 Check       |
| PLAT752_ALERT_4_C Angle Calc | 109.00,  | Rep   | 108.9(4)   | ..... | Senseless s.u. |
| O(1) -C(12)-H(7)             | 1.555    | 1.555 | 1.555 .... | #     | 99 Check       |
| PLAT752_ALERT_4_C Angle Calc | 108.00,  | Rep   | 107.9(4)   | ..... | Senseless s.u. |
| O(1) -C(12)-H(8)             | 1.555    | 1.555 | 1.555 .... | #     | 100 Check      |
| PLAT752_ALERT_4_C Angle Calc | 109.00,  | Rep   | 108.9(3)   | ..... | Senseless s.u. |
| C(2) -C(12)-H(7)             | 1.555    | 1.555 | 1.555 .... | #     | 101 Check      |
| PLAT752_ALERT_4_C Angle Calc | 108.00,  | Rep   | 108.1(4)   | ..... | Senseless s.u. |
| C(2) -C(12)-H(8)             | 1.555    | 1.555 | 1.555 .... | #     | 102 Check      |
| PLAT752_ALERT_4_C Angle Calc | 109.00,  | Rep   | 109.5(5)   | ..... | Senseless s.u. |
| H(7) -C(12)-H(8)             | 1.555    | 1.555 | 1.555 .... | #     | 103 Check      |
| PLAT752_ALERT_4_C Angle Calc | 109.00,  | Rep   | 108.9(3)   | ..... | Senseless s.u. |
| O(1) -C(13)-H(9)             | 1.555    | 1.555 | 1.555 .... | #     | 104 Check      |
| PLAT752_ALERT_4_C Angle Calc | 108.00,  | Rep   | 108.4(4)   | ..... | Senseless s.u. |
| O(1) -C(13)-H(10)            | 1.555    | 1.555 | 1.555 .... | #     | 105 Check      |
| PLAT752_ALERT_4_C Angle Calc | 109.00,  | Rep   | 109.6(4)   | ..... | Senseless s.u. |
| C(14)-C(13)-H(9)             | 1.555    | 1.555 | 1.555 .... | #     | 106 Check      |
| PLAT752_ALERT_4_C Angle Calc | 109.00,  | Rep   | 109.1(3)   | ..... | Senseless s.u. |
| C(14)-C(13)-H(10)            | 1.555    | 1.555 | 1.555 .... | #     | 107 Check      |
| PLAT752_ALERT_4_C Angle Calc | 109.00,  | Rep   | 109.5(4)   | ..... | Senseless s.u. |

|                              |         |       |                |                |
|------------------------------|---------|-------|----------------|----------------|
| H(9) -C(13)-H(10)            | 1.555   | 1.555 | 1.555 ....     | # 108 Check    |
| PLAT752_ALERT_4_C Angle Calc | 111.00, | Rep   | 111.3(3) ..... | Senseless s.u. |
| C(1) -C(14)-H(11)            | 1.555   | 1.555 | 1.555 ....     | # 109 Check    |
| PLAT752_ALERT_4_C Angle Calc | 111.00, | Rep   | 111.5(3) ..... | Senseless s.u. |
| C(13)-C(14)-H(11)            | 1.555   | 1.555 | 1.555 ....     | # 110 Check    |
| PLAT752_ALERT_4_C Angle Calc | 112.00, | Rep   | 112.1(3) ..... | Senseless s.u. |
| C(15)-C(14)-H(11)            | 1.555   | 1.555 | 1.555 ....     | # 111 Check    |
| PLAT752_ALERT_4_C Angle Calc | 110.00, | Rep   | 110.3(3) ..... | Senseless s.u. |
| C(14)-C(15)-H(12)            | 1.555   | 1.555 | 1.555 ....     | # 112 Check    |
| PLAT752_ALERT_4_C Angle Calc | 111.00, | Rep   | 110.7(3) ..... | Senseless s.u. |
| C(14)-C(15)-H(13)            | 1.555   | 1.555 | 1.555 ....     | # 113 Check    |
| PLAT752_ALERT_4_C Angle Calc | 110.00, | Rep   | 110.1(3) ..... | Senseless s.u. |
| C(16)-C(15)-H(12)            | 1.555   | 1.555 | 1.555 ....     | # 114 Check    |
| PLAT752_ALERT_4_C Angle Calc | 111.00, | Rep   | 110.9(3) ..... | Senseless s.u. |
| C(16)-C(15)-H(13)            | 1.555   | 1.555 | 1.555 ....     | # 115 Check    |
| PLAT752_ALERT_4_C Angle Calc | 110.00, | Rep   | 109.5(4) ..... | Senseless s.u. |
| H(12)-C(15)-H(13)            | 1.555   | 1.555 | 1.555 ....     | # 116 Check    |
| PLAT752_ALERT_4_C Angle Calc | 106.00, | Rep   | 106.1(3) ..... | Senseless s.u. |
| C(2) -C(16)-H(14)            | 1.555   | 1.555 | 1.555 ....     | # 117 Check    |
| PLAT752_ALERT_4_C Angle Calc | 106.00, | Rep   | 106.3(3) ..... | Senseless s.u. |
| C(15)-C(16)-H(14)            | 1.555   | 1.555 | 1.555 ....     | # 118 Check    |
| PLAT752_ALERT_4_C Angle Calc | 106.00, | Rep   | 105.7(3) ..... | Senseless s.u. |
| C(17)-C(16)-H(14)            | 1.555   | 1.555 | 1.555 ....     | # 119 Check    |
| PLAT752_ALERT_4_C Angle Calc | 119.00, | Rep   | 119.4(4) ..... | Senseless s.u. |
| C(17)-C(18)-H(15)            | 1.555   | 1.555 | 1.555 ....     | # 120 Check    |
| PLAT752_ALERT_4_C Angle Calc | 120.00, | Rep   | 119.8(4) ..... | Senseless s.u. |
| C(19)-C(18)-H(15)            | 1.555   | 1.555 | 1.555 ....     | # 121 Check    |
| PLAT752_ALERT_4_C Angle Calc | 120.00, | Rep   | 120.3(4) ..... | Senseless s.u. |
| C(18)-C(19)-H(16)            | 1.555   | 1.555 | 1.555 ....     | # 122 Check    |
| PLAT752_ALERT_4_C Angle Calc | 120.00, | Rep   | 120.1(4) ..... | Senseless s.u. |
| C(20)-C(19)-H(16)            | 1.555   | 1.555 | 1.555 ....     | # 123 Check    |
| PLAT752_ALERT_4_C Angle Calc | 120.00, | Rep   | 119.6(5) ..... | Senseless s.u. |
| C(19)-C(20)-H(17)            | 1.555   | 1.555 | 1.555 ....     | # 124 Check    |
| PLAT752_ALERT_4_C Angle Calc | 120.00, | Rep   | 120.1(5) ..... | Senseless s.u. |
| C(21)-C(20)-H(17)            | 1.555   | 1.555 | 1.555 ....     | # 125 Check    |
| PLAT752_ALERT_4_C Angle Calc | 119.00, | Rep   | 119.4(4) ..... | Senseless s.u. |
| C(20)-C(21)-H(18)            | 1.555   | 1.555 | 1.555 ....     | # 126 Check    |
| PLAT752_ALERT_4_C Angle Calc | 121.00, | Rep   | 120.6(5) ..... | Senseless s.u. |
| C(22)-C(21)-H(18)            | 1.555   | 1.555 | 1.555 ....     | # 127 Check    |
| PLAT752_ALERT_4_C Angle Calc | 119.00, | Rep   | 119.3(3) ..... | Senseless s.u. |
| C(17)-C(22)-H(19)            | 1.555   | 1.555 | 1.555 ....     | # 128 Check    |
| PLAT752_ALERT_4_C Angle Calc | 120.00, | Rep   | 119.7(4) ..... | Senseless s.u. |
| C(21)-C(22)-H(19)            | 1.555   | 1.555 | 1.555 ....     | # 129 Check    |
| PLAT752_ALERT_4_C Angle Calc | 120.00, | Rep   | 119.7(4) ..... | Senseless s.u. |
| C(24)-C(25)-H(20)            | 1.555   | 1.555 | 1.555 ....     | # 130 Check    |
| PLAT752_ALERT_4_C Angle Calc | 120.00, | Rep   | 120.1(4) ..... | Senseless s.u. |
| C(26)-C(25)-H(20)            | 1.555   | 1.555 | 1.555 ....     | # 131 Check    |
| PLAT752_ALERT_4_C Angle Calc | 119.00, | Rep   | 119.3(5) ..... | Senseless s.u. |
| C(25)-C(26)-H(21)            | 1.555   | 1.555 | 1.555 ....     | # 132 Check    |
| PLAT752_ALERT_4_C Angle Calc | 119.00, | Rep   | 118.4(4) ..... | Senseless s.u. |
| C(32)-C(26)-H(21)            | 1.555   | 1.555 | 1.555 ....     | # 133 Check    |
| PLAT752_ALERT_4_C Angle Calc | 119.00, | Rep   | 119.1(5) ..... | Senseless s.u. |
| C(28)-C(27)-H(22)            | 1.555   | 1.555 | 1.555 ....     | # 134 Check    |
| PLAT752_ALERT_4_C Angle Calc | 119.00, | Rep   | 119.3(5) ..... | Senseless s.u. |
| C(32)-C(27)-H(22)            | 1.555   | 1.555 | 1.555 ....     | # 135 Check    |
| PLAT752_ALERT_4_C Angle Calc | 120.00, | Rep   | 120.3(4) ..... | Senseless s.u. |
| C(27)-C(28)-H(23)            | 1.555   | 1.555 | 1.555 ....     | # 136 Check    |
| PLAT752_ALERT_4_C Angle Calc | 120.00, | Rep   | 119.7(5) ..... | Senseless s.u. |
| C(29)-C(28)-H(23)            | 1.555   | 1.555 | 1.555 ....     | # 137 Check    |
| PLAT752_ALERT_4_C Angle Calc | 120.00, | Rep   | 120.0(4) ..... | Senseless s.u. |
| C(28)-C(29)-H(24)            | 1.555   | 1.555 | 1.555 ....     | # 138 Check    |
| PLAT752_ALERT_4_C Angle Calc | 120.00, | Rep   | 120.5(4) ..... | Senseless s.u. |

|                                |          |             |                |                |
|--------------------------------|----------|-------------|----------------|----------------|
| C(30)-C(29)-H(24)              | 1.555    | 1.555       | 1.555 ....     | # 139 Check    |
| PLAT752_ALERT_4_C Angle Calc   | 120.00,  | Rep         | 120.1(4) ..... | Senseless s.u. |
| C(29)-C(30)-H(25)              | 1.555    | 1.555       | 1.555 ....     | # 140 Check    |
| PLAT752_ALERT_4_C Angle Calc   | 119.00,  | Rep         | 119.4(4) ..... | Senseless s.u. |
| C(31)-C(30)-H(25)              | 1.555    | 1.555       | 1.555 ....     | # 141 Check    |
| PLAT752_ALERT_4_C Angle Calc   | 109.00,  | Rep         | 108.6(3) ..... | Senseless s.u. |
| O(2) -C(34)-H(26)              | 1.555    | 1.555       | 1.555 ....     | # 142 Check    |
| PLAT752_ALERT_4_C Angle Calc   | 108.00,  | Rep         | 108.4(3) ..... | Senseless s.u. |
| O(2) -C(34)-H(27)              | 1.555    | 1.555       | 1.555 ....     | # 143 Check    |
| PLAT752_ALERT_4_C Angle Calc   | 109.00,  | Rep         | 109.0(3) ..... | Senseless s.u. |
| C(24)-C(34)-H(26)              | 1.555    | 1.555       | 1.555 ....     | # 144 Check    |
| PLAT752_ALERT_4_C Angle Calc   | 108.00,  | Rep         | 108.2(3) ..... | Senseless s.u. |
| C(24)-C(34)-H(27)              | 1.555    | 1.555       | 1.555 ....     | # 145 Check    |
| PLAT752_ALERT_4_C Angle Calc   | 109.00,  | Rep         | 109.5(6) ..... | Senseless s.u. |
| H(26)-C(34)-H(27)              | 1.555    | 1.555       | 1.555 ....     | # 146 Check    |
| PLAT752_ALERT_4_C Angle Calc   | 108.00,  | Rep         | 108.2(5) ..... | Senseless s.u. |
| O(2) -C(35)-H(28)              | 1.555    | 1.555       | 1.555 ....     | # 147 Check    |
| PLAT752_ALERT_4_C Angle Calc   | 109.00,  | Rep         | 108.9(4) ..... | Senseless s.u. |
| O(2) -C(35)-H(29)              | 1.555    | 1.555       | 1.555 ....     | # 148 Check    |
| PLAT752_ALERT_4_C Angle Calc   | 109.00,  | Rep         | 109.0(4) ..... | Senseless s.u. |
| C(36)-C(35)-H(28)              | 1.555    | 1.555       | 1.555 ....     | # 149 Check    |
| PLAT752_ALERT_4_C Angle Calc   | 110.00,  | Rep         | 110.0(5) ..... | Senseless s.u. |
| C(36)-C(35)-H(29)              | 1.555    | 1.555       | 1.555 ....     | # 150 Check    |
| PLAT752_ALERT_4_C Angle Calc   | 109.00,  | Rep         | 109.5(4) ..... | Senseless s.u. |
| H(28)-C(35)-H(29)              | 1.555    | 1.555       | 1.555 ....     | # 151 Check    |
| PLAT752_ALERT_4_C Angle Calc   | 111.00,  | Rep         | 111.1(3) ..... | Senseless s.u. |
| C(23)-C(36)-H(30)              | 1.555    | 1.555       | 1.555 ....     | # 152 Check    |
| PLAT752_ALERT_4_C Angle Calc   | 111.00,  | Rep         | 111.4(3) ..... | Senseless s.u. |
| C(35)-C(36)-H(30)              | 1.555    | 1.555       | 1.555 ....     | # 153 Check    |
| PLAT752_ALERT_4_C Angle Calc   | 112.00,  | Rep         | 111.9(4) ..... | Senseless s.u. |
| C(37)-C(36)-H(30)              | 1.555    | 1.555       | 1.555 ....     | # 154 Check    |
| PLAT752_ALERT_4_C Angle Calc   | 111.00,  | Rep         | 110.8(3) ..... | Senseless s.u. |
| C(36)-C(37)-H(31)              | 1.555    | 1.555       | 1.555 ....     | # 155 Check    |
| PLAT752_ALERT_4_C Angle Calc   | 110.00,  | Rep         | 110.5(3) ..... | Senseless s.u. |
| C(36)-C(37)-H(32)              | 1.555    | 1.555       | 1.555 ....     | # 156 Check    |
| PLAT752_ALERT_4_C Angle Calc   | 110.00,  | Rep         | 110.2(3) ..... | Senseless s.u. |
| C(38)-C(37)-H(31)              | 1.555    | 1.555       | 1.555 ....     | # 157 Check    |
| PLAT752_ALERT_4_C Angle Calc   | 110.00,  | Rep         | 110.2(3) ..... | Senseless s.u. |
| C(38)-C(37)-H(32)              | 1.555    | 1.555       | 1.555 ....     | # 158 Check    |
| PLAT752_ALERT_4_C Angle Calc   | 109.00,  | Rep         | 109.5(4) ..... | Senseless s.u. |
| H(31)-C(37)-H(32)              | 1.555    | 1.555       | 1.555 ....     | # 159 Check    |
| PLAT754_ALERT_4_C Contact Calc | 1.95000, | Rep         | 1.953(5) ..... | Senseless s.u. |
| O(1) -H(7)                     | 1.555    | 1.555 ..... | # 94 Check     |                |
| PLAT754_ALERT_4_C Contact Calc | 1.94000, | Rep         | 1.942(6) ..... | Senseless s.u. |
| O(1) -H(8)                     | 1.555    | 1.555 ..... | # 94 Check     |                |
| PLAT754_ALERT_4_C Contact Calc | 1.95000, | Rep         | 1.954(5) ..... | Senseless s.u. |
| O(1) -H(9)                     | 1.555    | 1.555 ..... | # 94 Check     |                |
| PLAT754_ALERT_4_C Contact Calc | 1.95000, | Rep         | 1.949(4) ..... | Senseless s.u. |
| O(1) -H(10)                    | 1.555    | 1.555 ..... | # 94 Check     |                |
| PLAT754_ALERT_4_C Contact Calc | 3.26000, | Rep         | 3.257(4) ..... | Senseless s.u. |
| O(1) -H(11)                    | 1.555    | 1.555 ..... | # 94 Check     |                |
| PLAT754_ALERT_4_C Contact Calc | 2.64000, | Rep         | 2.639(4) ..... | Senseless s.u. |
| O(1) -H(12)                    | 1.555    | 1.555 ..... | # 94 Check     |                |
| PLAT754_ALERT_4_C Contact Calc | 2.47000, | Rep         | 2.466(3) ..... | Senseless s.u. |
| O(1) -H(19)                    | 1.555    | 1.555 ..... | # 94 Check     |                |
| PLAT754_ALERT_4_C Contact Calc | 2.85000, | Rep         | 2.852(3) ..... | Senseless s.u. |
| O(1) -H(32)                    | 1.555    | 2.645 ..... | # 94 Check     |                |
| PLAT754_ALERT_4_C Contact Calc | 2.73000, | Rep         | 2.730(4) ..... | Senseless s.u. |
| O(2) -H(3)                     | 1.555    | 4.564 ..... | # 94 Check     |                |
| PLAT754_ALERT_4_C Contact Calc | 3.39000, | Rep         | 3.389(6) ..... | Senseless s.u. |
| O(2) -H(4)                     | 1.555    | 4.564 ..... | # 94 Check     |                |
| PLAT754_ALERT_4_C Contact Calc | 3.05000, | Rep         | 3.049(4) ..... | Senseless s.u. |

|                                |          |       |          |       |                |
|--------------------------------|----------|-------|----------|-------|----------------|
| O(2) -H(7)                     | 1.555    | 2.655 | .....    | #     | 94 Check       |
| PLAT754_ALERT_4_C Contact Calc | 3.07000, | Rep   | 3.075(5) | ..... | Senseless s.u. |
| O(2) -H(16)                    | 1.555    | 4.554 | .....    | #     | 94 Check       |
| PLAT754_ALERT_4_C Contact Calc | 1.95000, | Rep   | 1.948(4) | ..... | Senseless s.u. |
| O(2) -H(26)                    | 1.555    | 1.555 | .....    | #     | 94 Check       |
| PLAT754_ALERT_4_C Contact Calc | 1.95000, | Rep   | 1.945(5) | ..... | Senseless s.u. |
| O(2) -H(27)                    | 1.555    | 1.555 | .....    | #     | 94 Check       |
| PLAT754_ALERT_4_C Contact Calc | 1.95000, | Rep   | 1.947(4) | ..... | Senseless s.u. |
| O(2) -H(28)                    | 1.555    | 1.555 | .....    | #     | 94 Check       |
| PLAT754_ALERT_4_C Contact Calc | 1.96000, | Rep   | 1.954(5) | ..... | Senseless s.u. |
| O(2) -H(29)                    | 1.555    | 1.555 | .....    | #     | 94 Check       |
| PLAT754_ALERT_4_C Contact Calc | 3.25000, | Rep   | 3.249(5) | ..... | Senseless s.u. |
| O(2) -H(30)                    | 1.555    | 1.555 | .....    | #     | 94 Check       |
| PLAT754_ALERT_4_C Contact Calc | 2.69000, | Rep   | 2.689(5) | ..... | Senseless s.u. |
| O(2) -H(32)                    | 1.555    | 1.555 | .....    | #     | 94 Check       |
| PLAT754_ALERT_4_C Contact Calc | 2.66000, | Rep   | 2.659(6) | ..... | Senseless s.u. |
| N(1) -H(2)                     | 1.555    | 3.666 | .....    | #     | 94 Check       |
| PLAT754_ALERT_4_C Contact Calc | 3.04000, | Rep   | 3.044(4) | ..... | Senseless s.u. |
| N(1) -H(7)                     | 1.555    | 1.555 | .....    | #     | 94 Check       |
| PLAT754_ALERT_4_C Contact Calc | 2.98000, | Rep   | 2.982(5) | ..... | Senseless s.u. |
| N(1) -H(9)                     | 1.555    | 2.655 | .....    | #     | 94 Check       |
| PLAT754_ALERT_4_C Contact Calc | 2.90000, | Rep   | 2.903(5) | ..... | Senseless s.u. |
| N(1) -H(10)                    | 1.555    | 1.555 | .....    | #     | 94 Check       |
| PLAT754_ALERT_4_C Contact Calc | 3.51000, | Rep   | 3.512(5) | ..... | Senseless s.u. |
| N(1) -H(17)                    | 1.555    | 1.565 | .....    | #     | 94 Check       |
| PLAT754_ALERT_4_C Contact Calc | 2.89000, | Rep   | 2.894(4) | ..... | Senseless s.u. |
| N(1) -H(18)                    | 1.555    | 1.565 | .....    | #     | 94 Check       |
| PLAT754_ALERT_4_C Contact Calc | 2.73000, | Rep   | 2.734(4) | ..... | Senseless s.u. |
| N(1) -H(29)                    | 1.555    | 2.645 | .....    | #     | 94 Check       |
| PLAT754_ALERT_4_C Contact Calc | 2.59000, | Rep   | 2.587(6) | ..... | Senseless s.u. |
| N(2) -H(20)                    | 1.555    | 2.755 | .....    | #     | 94 Check       |
| PLAT754_ALERT_4_C Contact Calc | 2.84000, | Rep   | 2.842(6) | ..... | Senseless s.u. |
| N(2) -H(23)                    | 1.555    | 3.776 | .....    | #     | 94 Check       |
| PLAT754_ALERT_4_C Contact Calc | 2.95000, | Rep   | 2.951(5) | ..... | Senseless s.u. |
| N(2) -H(24)                    | 1.555    | 3.776 | .....    | #     | 94 Check       |
| PLAT754_ALERT_4_C Contact Calc | 2.98000, | Rep   | 2.975(5) | ..... | Senseless s.u. |
| N(2) -H(26)                    | 1.555    | 2.755 | .....    | #     | 94 Check       |
| PLAT754_ALERT_4_C Contact Calc | 3.04000, | Rep   | 3.038(4) | ..... | Senseless s.u. |
| N(2) -H(27)                    | 1.555    | 1.555 | .....    | #     | 94 Check       |
| PLAT754_ALERT_4_C Contact Calc | 2.94000, | Rep   | 2.944(5) | ..... | Senseless s.u. |
| N(2) -H(28)                    | 1.555    | 1.555 | .....    | #     | 94 Check       |
| PLAT754_ALERT_4_C Contact Calc | 3.36000, | Rep   | 3.357(6) | ..... | Senseless s.u. |
| C(1) -H(1)                     | 1.555    | 1.555 | .....    | #     | 94 Check       |
| PLAT754_ALERT_4_C Contact Calc | 2.69000, | Rep   | 2.690(4) | ..... | Senseless s.u. |
| C(1) -H(6)                     | 1.555    | 1.555 | .....    | #     | 94 Check       |
| PLAT754_ALERT_4_C Contact Calc | 2.68000, | Rep   | 2.682(4) | ..... | Senseless s.u. |
| C(1) -H(7)                     | 1.555    | 1.555 | .....    | #     | 94 Check       |
| PLAT754_ALERT_4_C Contact Calc | 3.32000, | Rep   | 3.321(4) | ..... | Senseless s.u. |
| C(1) -H(8)                     | 1.555    | 1.555 | .....    | #     | 94 Check       |
| PLAT754_ALERT_4_C Contact Calc | 3.32000, | Rep   | 3.323(5) | ..... | Senseless s.u. |
| C(1) -H(9)                     | 1.555    | 1.555 | .....    | #     | 94 Check       |
| PLAT754_ALERT_4_C Contact Calc | 2.64000, | Rep   | 2.643(4) | ..... | Senseless s.u. |
| C(1) -H(10)                    | 1.555    | 1.555 | .....    | #     | 94 Check       |
| PLAT754_ALERT_4_C Contact Calc | 2.08000, | Rep   | 2.083(5) | ..... | Senseless s.u. |
| C(1) -H(11)                    | 1.555    | 1.555 | .....    | #     | 94 Check       |
| PLAT754_ALERT_4_C Contact Calc | 3.18000, | Rep   | 3.183(4) | ..... | Senseless s.u. |
| C(1) -H(12)                    | 1.555    | 1.555 | .....    | #     | 94 Check       |
| PLAT754_ALERT_4_C Contact Calc | 2.88000, | Rep   | 2.884(4) | ..... | Senseless s.u. |
| C(1) -H(13)                    | 1.555    | 1.555 | .....    | #     | 94 Check       |
| PLAT754_ALERT_4_C Contact Calc | 2.61000, | Rep   | 2.612(3) | ..... | Senseless s.u. |
| C(1) -H(14)                    | 1.555    | 1.555 | .....    | #     | 94 Check       |
| PLAT754_ALERT_4_C Contact Calc | 2.13000, | Rep   | 2.126(6) | ..... | Senseless s.u. |

|                                |          |       |          |       |                |
|--------------------------------|----------|-------|----------|-------|----------------|
| C(2) -H(1)                     | 1.555    | 1.555 | .....    | #     | 94 Check       |
| PLAT754_ALERT_4_C Contact Calc | 3.31000, | Rep   | 3.312(6) | ..... | Senseless s.u. |
| C(2) -H(2)                     | 1.555    | 1.555 | .....    | #     | 94 Check       |
| PLAT754_ALERT_4_C Contact Calc | 2.04000, | Rep   | 2.044(4) | ..... | Senseless s.u. |
| C(2) -H(7)                     | 1.555    | 1.555 | .....    | #     | 94 Check       |
| PLAT754_ALERT_4_C Contact Calc | 2.03000, | Rep   | 2.034(4) | ..... | Senseless s.u. |
| C(2) -H(8)                     | 1.555    | 1.555 | .....    | #     | 94 Check       |
| PLAT754_ALERT_4_C Contact Calc | 3.21000, | Rep   | 3.207(5) | ..... | Senseless s.u. |
| C(2) -H(10)                    | 1.555    | 1.555 | .....    | #     | 94 Check       |
| PLAT754_ALERT_4_C Contact Calc | 3.21000, | Rep   | 3.213(5) | ..... | Senseless s.u. |
| C(2) -H(11)                    | 1.555    | 1.555 | .....    | #     | 94 Check       |
| PLAT754_ALERT_4_C Contact Calc | 3.02000, | Rep   | 3.022(5) | ..... | Senseless s.u. |
| C(2) -H(12)                    | 1.555    | 1.555 | .....    | #     | 94 Check       |
| PLAT754_ALERT_4_C Contact Calc | 3.15000, | Rep   | 3.150(5) | ..... | Senseless s.u. |
| C(2) -H(13)                    | 1.555    | 1.555 | .....    | #     | 94 Check       |
| PLAT754_ALERT_4_C Contact Calc | 2.04000, | Rep   | 2.041(4) | ..... | Senseless s.u. |
| C(2) -H(14)                    | 1.555    | 1.555 | .....    | #     | 94 Check       |
| PLAT754_ALERT_4_C Contact Calc | 3.56000, | Rep   | 3.556(4) | ..... | Senseless s.u. |
| C(2) -H(15)                    | 1.555    | 1.555 | .....    | #     | 94 Check       |
| PLAT754_ALERT_4_C Contact Calc | 3.36000, | Rep   | 3.362(4) | ..... | Senseless s.u. |
| C(2) -H(19)                    | 1.555    | 1.555 | .....    | #     | 94 Check       |
| PLAT754_ALERT_4_C Contact Calc | 1.97000, | Rep   | 1.967(5) | ..... | Senseless s.u. |
| C(3) -H(2)                     | 1.555    | 1.555 | .....    | #     | 94 Check       |
| PLAT754_ALERT_4_C Contact Calc | 2.67000, | Rep   | 2.671(5) | ..... | Senseless s.u. |
| C(3) -H(7)                     | 1.555    | 1.555 | .....    | #     | 94 Check       |
| PLAT754_ALERT_4_C Contact Calc | 2.64000, | Rep   | 2.641(5) | ..... | Senseless s.u. |
| C(3) -H(8)                     | 1.555    | 1.555 | .....    | #     | 94 Check       |
| PLAT754_ALERT_4_C Contact Calc | 2.58000, | Rep   | 2.586(5) | ..... | Senseless s.u. |
| C(3) -H(14)                    | 1.555    | 1.555 | .....    | #     | 94 Check       |
| PLAT754_ALERT_4_C Contact Calc | 3.41000, | Rep   | 3.408(4) | ..... | Senseless s.u. |
| C(3) -H(15)                    | 1.555    | 1.555 | .....    | #     | 94 Check       |
| PLAT754_ALERT_4_C Contact Calc | 3.34000, | Rep   | 3.342(6) | ..... | Senseless s.u. |
| C(3) -H(17)                    | 1.555    | 3.656 | .....    | #     | 94 Check       |
| PLAT754_ALERT_4_C Contact Calc | 1.96000, | Rep   | 1.965(5) | ..... | Senseless s.u. |
| C(4) -H(1)                     | 1.555    | 1.555 | .....    | #     | 94 Check       |
| PLAT754_ALERT_4_C Contact Calc | 2.66000, | Rep   | 2.657(4) | ..... | Senseless s.u. |
| C(4) -H(3)                     | 1.555    | 1.555 | .....    | #     | 94 Check       |
| PLAT754_ALERT_4_C Contact Calc | 2.94000, | Rep   | 2.940(5) | ..... | Senseless s.u. |
| C(4) -H(14)                    | 1.555    | 1.555 | .....    | #     | 94 Check       |
| PLAT754_ALERT_4_C Contact Calc | 2.68000, | Rep   | 2.684(6) | ..... | Senseless s.u. |
| C(5) -H(2)                     | 1.555    | 1.555 | .....    | #     | 94 Check       |
| PLAT754_ALERT_4_C Contact Calc | 2.03000, | Rep   | 2.025(5) | ..... | Senseless s.u. |
| C(5) -H(4)                     | 1.555    | 1.555 | .....    | #     | 94 Check       |
| PLAT754_ALERT_4_C Contact Calc | 3.24000, | Rep   | 3.241(7) | ..... | Senseless s.u. |
| C(5) -H(5)                     | 1.555    | 1.555 | .....    | #     | 94 Check       |
| PLAT754_ALERT_4_C Contact Calc | 2.98000, | Rep   | 2.984(5) | ..... | Senseless s.u. |
| C(5) -H(17)                    | 1.555    | 1.565 | .....    | #     | 94 Check       |
| PLAT754_ALERT_4_C Contact Calc | 2.88000, | Rep   | 2.876(5) | ..... | Senseless s.u. |
| C(5) -H(21)                    | 1.555    | 3.766 | .....    | #     | 94 Check       |
| PLAT754_ALERT_4_C Contact Calc | 3.49000, | Rep   | 3.487(6) | ..... | Senseless s.u. |
| C(5) -H(28)                    | 1.555    | 4.565 | .....    | #     | 94 Check       |
| PLAT754_ALERT_4_C Contact Calc | 2.03000, | Rep   | 2.033(7) | ..... | Senseless s.u. |
| C(6) -H(3)                     | 1.555    | 1.555 | .....    | #     | 94 Check       |
| PLAT754_ALERT_4_C Contact Calc | 2.02000, | Rep   | 2.017(7) | ..... | Senseless s.u. |
| C(6) -H(5)                     | 1.555    | 1.555 | .....    | #     | 94 Check       |
| PLAT754_ALERT_4_C Contact Calc | 3.24000, | Rep   | 3.243(6) | ..... | Senseless s.u. |
| C(6) -H(6)                     | 1.555    | 1.555 | .....    | #     | 94 Check       |
| PLAT754_ALERT_4_C Contact Calc | 3.53000, | Rep   | 3.533(5) | ..... | Senseless s.u. |
| C(6) -H(16)                    | 1.555    | 1.565 | .....    | #     | 94 Check       |
| PLAT754_ALERT_4_C Contact Calc | 3.13000, | Rep   | 3.128(5) | ..... | Senseless s.u. |
| C(6) -H(17)                    | 1.555    | 1.565 | .....    | #     | 94 Check       |
| PLAT754_ALERT_4_C Contact Calc | 3.05000, | Rep   | 3.053(4) | ..... | Senseless s.u. |

|                                |          |       |          |       |                |
|--------------------------------|----------|-------|----------|-------|----------------|
| C(6) -H(21)                    | 1.555    | 3.766 | .....    | #     | 94 Check       |
| PLAT754_ALERT_4_C Contact Calc | 3.57000, | Rep   | 3.570(6) | ..... | Senseless s.u. |
| C(6) -H(27)                    | 1.555    | 4.565 | .....    | #     | 94 Check       |
| PLAT754_ALERT_4_C Contact Calc | 3.24000, | Rep   | 3.236(7) | ..... | Senseless s.u. |
| C(7) -H(3)                     | 1.555    | 1.555 | .....    | #     | 94 Check       |
| PLAT754_ALERT_4_C Contact Calc | 2.02000, | Rep   | 2.018(6) | ..... | Senseless s.u. |
| C(7) -H(4)                     | 1.555    | 1.555 | .....    | #     | 94 Check       |
| PLAT754_ALERT_4_C Contact Calc | 2.05000, | Rep   | 2.047(5) | ..... | Senseless s.u. |
| C(7) -H(6)                     | 1.555    | 1.555 | .....    | #     | 94 Check       |
| PLAT754_ALERT_4_C Contact Calc | 3.36000, | Rep   | 3.358(6) | ..... | Senseless s.u. |
| C(7) -H(17)                    | 1.555    | 1.565 | .....    | #     | 94 Check       |
| PLAT754_ALERT_4_C Contact Calc | 3.55000, | Rep   | 3.548(5) | ..... | Senseless s.u. |
| C(7) -H(21)                    | 1.555    | 3.766 | .....    | #     | 94 Check       |
| PLAT754_ALERT_4_C Contact Calc | 3.17000, | Rep   | 3.164(4) | ..... | Senseless s.u. |
| C(7) -H(22)                    | 1.555    | 3.766 | .....    | #     | 94 Check       |
| PLAT754_ALERT_4_C Contact Calc | 3.21000, | Rep   | 3.213(5) | ..... | Senseless s.u. |
| C(7) -H(31)                    | 1.555    | 1.555 | .....    | #     | 94 Check       |
| PLAT754_ALERT_4_C Contact Calc | 3.24000, | Rep   | 3.244(5) | ..... | Senseless s.u. |
| C(8) -H(4)                     | 1.555    | 1.555 | .....    | #     | 94 Check       |
| PLAT754_ALERT_4_C Contact Calc | 2.04000, | Rep   | 2.035(4) | ..... | Senseless s.u. |
| C(8) -H(5)                     | 1.555    | 1.555 | .....    | #     | 94 Check       |
| PLAT754_ALERT_4_C Contact Calc | 2.81000, | Rep   | 2.808(4) | ..... | Senseless s.u. |
| C(8) -H(11)                    | 1.555    | 1.555 | .....    | #     | 94 Check       |
| PLAT754_ALERT_4_C Contact Calc | 3.25000, | Rep   | 3.253(4) | ..... | Senseless s.u. |
| C(8) -H(13)                    | 1.555    | 1.555 | .....    | #     | 94 Check       |
| PLAT754_ALERT_4_C Contact Calc | 3.45000, | Rep   | 3.451(4) | ..... | Senseless s.u. |
| C(8) -H(14)                    | 1.555    | 1.555 | .....    | #     | 94 Check       |
| PLAT754_ALERT_4_C Contact Calc | 3.42000, | Rep   | 3.415(6) | ..... | Senseless s.u. |
| C(8) -H(17)                    | 1.555    | 1.565 | .....    | #     | 94 Check       |
| PLAT754_ALERT_4_C Contact Calc | 2.93000, | Rep   | 2.934(4) | ..... | Senseless s.u. |
| C(8) -H(22)                    | 1.555    | 3.766 | .....    | #     | 94 Check       |
| PLAT754_ALERT_4_C Contact Calc | 3.01000, | Rep   | 3.007(4) | ..... | Senseless s.u. |
| C(8) -H(31)                    | 1.555    | 1.555 | .....    | #     | 94 Check       |
| PLAT754_ALERT_4_C Contact Calc | 3.30000, | Rep   | 3.303(6) | ..... | Senseless s.u. |
| C(9) -H(2)                     | 1.555    | 1.555 | .....    | #     | 94 Check       |
| PLAT754_ALERT_4_C Contact Calc | 3.26000, | Rep   | 3.256(5) | ..... | Senseless s.u. |
| C(9) -H(3)                     | 1.555    | 1.555 | .....    | #     | 94 Check       |
| PLAT754_ALERT_4_C Contact Calc | 3.26000, | Rep   | 3.263(5) | ..... | Senseless s.u. |
| C(9) -H(5)                     | 1.555    | 1.555 | .....    | #     | 94 Check       |
| PLAT754_ALERT_4_C Contact Calc | 2.02000, | Rep   | 2.016(6) | ..... | Senseless s.u. |
| C(9) -H(6)                     | 1.555    | 1.555 | .....    | #     | 94 Check       |
| PLAT754_ALERT_4_C Contact Calc | 2.79000, | Rep   | 2.793(5) | ..... | Senseless s.u. |
| C(9) -H(11)                    | 1.555    | 1.555 | .....    | #     | 94 Check       |
| PLAT754_ALERT_4_C Contact Calc | 3.13000, | Rep   | 3.128(5) | ..... | Senseless s.u. |
| C(9) -H(13)                    | 1.555    | 1.555 | .....    | #     | 94 Check       |
| PLAT754_ALERT_4_C Contact Calc | 2.62000, | Rep   | 2.620(3) | ..... | Senseless s.u. |
| C(9) -H(14)                    | 1.555    | 1.555 | .....    | #     | 94 Check       |
| PLAT754_ALERT_4_C Contact Calc | 3.28000, | Rep   | 3.279(5) | ..... | Senseless s.u. |
| C(9) -H(17)                    | 1.555    | 1.565 | .....    | #     | 94 Check       |
| PLAT754_ALERT_4_C Contact Calc | 3.28000, | Rep   | 3.277(5) | ..... | Senseless s.u. |
| C(9) -H(22)                    | 1.555    | 3.766 | .....    | #     | 94 Check       |
| PLAT754_ALERT_4_C Contact Calc | 3.28000, | Rep   | 3.284(5) | ..... | Senseless s.u. |
| C(10)-H(1)                     | 1.555    | 1.555 | .....    | #     | 94 Check       |
| PLAT754_ALERT_4_C Contact Calc | 2.09000, | Rep   | 2.088(6) | ..... | Senseless s.u. |
| C(10)-H(2)                     | 1.555    | 1.555 | .....    | #     | 94 Check       |
| PLAT754_ALERT_4_C Contact Calc | 2.03000, | Rep   | 2.033(5) | ..... | Senseless s.u. |
| C(10)-H(3)                     | 1.555    | 1.555 | .....    | #     | 94 Check       |
| PLAT754_ALERT_4_C Contact Calc | 3.27000, | Rep   | 3.266(5) | ..... | Senseless s.u. |
| C(10)-H(4)                     | 1.555    | 1.555 | .....    | #     | 94 Check       |
| PLAT754_ALERT_4_C Contact Calc | 3.25000, | Rep   | 3.252(6) | ..... | Senseless s.u. |
| C(10)-H(6)                     | 1.555    | 1.555 | .....    | #     | 94 Check       |
| PLAT754_ALERT_4_C Contact Calc | 2.87000, | Rep   | 2.872(4) | ..... | Senseless s.u. |



|                                |          |       |          |       |                |
|--------------------------------|----------|-------|----------|-------|----------------|
| C(10)-H(14)                    | 1.555    | 1.555 | .....    | #     | 94 Check       |
| PLAT754_ALERT_4_C Contact Calc | 3.08000, | Rep   | 3.084(4) | ..... | Senseless s.u. |
| C(10)-H(17)                    | 1.555    | 1.565 | .....    | #     | 94 Check       |
| PLAT754_ALERT_4_C Contact Calc | 3.27000, | Rep   | 3.270(4) | ..... | Senseless s.u. |
| C(10)-H(21)                    | 1.555    | 3.766 | .....    | #     | 94 Check       |
| PLAT754_ALERT_4_C Contact Calc | 3.36000, | Rep   | 3.360(6) | ..... | Senseless s.u. |
| C(11)-H(2)                     | 1.555    | 3.666 | .....    | #     | 94 Check       |
| PLAT754_ALERT_4_C Contact Calc | 3.34000, | Rep   | 3.340(5) | ..... | Senseless s.u. |
| C(11)-H(6)                     | 1.555    | 1.555 | .....    | #     | 94 Check       |
| PLAT754_ALERT_4_C Contact Calc | 2.56000, | Rep   | 2.560(4) | ..... | Senseless s.u. |
| C(11)-H(7)                     | 1.555    | 1.555 | .....    | #     | 94 Check       |
| PLAT754_ALERT_4_C Contact Calc | 2.46000, | Rep   | 2.461(5) | ..... | Senseless s.u. |
| C(11)-H(10)                    | 1.555    | 1.555 | .....    | #     | 94 Check       |
| PLAT754_ALERT_4_C Contact Calc | 2.80000, | Rep   | 2.796(5) | ..... | Senseless s.u. |
| C(11)-H(11)                    | 1.555    | 1.555 | .....    | #     | 94 Check       |
| PLAT754_ALERT_4_C Contact Calc | 3.58000, | Rep   | 3.577(5) | ..... | Senseless s.u. |
| C(11)-H(17)                    | 1.555    | 1.565 | .....    | #     | 94 Check       |
| PLAT754_ALERT_4_C Contact Calc | 3.46000, | Rep   | 3.460(4) | ..... | Senseless s.u. |
| C(11)-H(18)                    | 1.555    | 1.565 | .....    | #     | 94 Check       |
| PLAT754_ALERT_4_C Contact Calc | 3.22000, | Rep   | 3.221(4) | ..... | Senseless s.u. |
| C(11)-H(29)                    | 1.555    | 2.645 | .....    | #     | 94 Check       |
| PLAT754_ALERT_4_C Contact Calc | 2.64000, | Rep   | 2.635(6) | ..... | Senseless s.u. |
| C(12)-H(1)                     | 1.555    | 1.555 | .....    | #     | 94 Check       |
| PLAT754_ALERT_4_C Contact Calc | 3.19000, | Rep   | 3.189(6) | ..... | Senseless s.u. |
| C(12)-H(9)                     | 1.555    | 1.555 | .....    | #     | 94 Check       |
| PLAT754_ALERT_4_C Contact Calc | 2.66000, | Rep   | 2.661(6) | ..... | Senseless s.u. |
| C(12)-H(10)                    | 1.555    | 1.555 | .....    | #     | 94 Check       |
| PLAT754_ALERT_4_C Contact Calc | 3.29000, | Rep   | 3.291(5) | ..... | Senseless s.u. |
| C(12)-H(12)                    | 1.555    | 1.555 | .....    | #     | 94 Check       |
| PLAT754_ALERT_4_C Contact Calc | 3.34000, | Rep   | 3.343(4) | ..... | Senseless s.u. |
| C(12)-H(14)                    | 1.555    | 1.555 | .....    | #     | 94 Check       |
| PLAT754_ALERT_4_C Contact Calc | 2.91000, | Rep   | 2.914(5) | ..... | Senseless s.u. |
| C(12)-H(19)                    | 1.555    | 1.555 | .....    | #     | 94 Check       |
| PLAT754_ALERT_4_C Contact Calc | 3.44000, | Rep   | 3.442(4) | ..... | Senseless s.u. |
| C(12)-H(29)                    | 1.555    | 2.645 | .....    | #     | 94 Check       |
| PLAT754_ALERT_4_C Contact Calc | 3.41000, | Rep   | 3.415(4) | ..... | Senseless s.u. |
| C(12)-H(32)                    | 1.555    | 2.645 | .....    | #     | 94 Check       |
| PLAT754_ALERT_4_C Contact Calc | 2.68000, | Rep   | 2.684(6) | ..... | Senseless s.u. |
| C(13)-H(7)                     | 1.555    | 1.555 | .....    | #     | 94 Check       |
| PLAT754_ALERT_4_C Contact Calc | 3.18000, | Rep   | 3.179(6) | ..... | Senseless s.u. |
| C(13)-H(8)                     | 1.555    | 1.555 | .....    | #     | 94 Check       |
| PLAT754_ALERT_4_C Contact Calc | 2.07000, | Rep   | 2.071(4) | ..... | Senseless s.u. |
| C(13)-H(11)                    | 1.555    | 1.555 | .....    | #     | 94 Check       |
| PLAT754_ALERT_4_C Contact Calc | 2.49000, | Rep   | 2.490(4) | ..... | Senseless s.u. |
| C(13)-H(12)                    | 1.555    | 1.555 | .....    | #     | 94 Check       |
| PLAT754_ALERT_4_C Contact Calc | 3.27000, | Rep   | 3.270(4) | ..... | Senseless s.u. |
| C(13)-H(13)                    | 1.555    | 1.555 | .....    | #     | 94 Check       |
| PLAT754_ALERT_4_C Contact Calc | 3.25000, | Rep   | 3.254(6) | ..... | Senseless s.u. |
| C(13)-H(18)                    | 1.555    | 2.655 | .....    | #     | 94 Check       |
| PLAT754_ALERT_4_C Contact Calc | 3.43000, | Rep   | 3.429(4) | ..... | Senseless s.u. |
| C(13)-H(19)                    | 1.555    | 1.555 | .....    | #     | 94 Check       |
| PLAT754_ALERT_4_C Contact Calc | 3.38000, | Rep   | 3.376(4) | ..... | Senseless s.u. |
| C(13)-H(32)                    | 1.555    | 2.645 | .....    | #     | 94 Check       |
| PLAT754_ALERT_4_C Contact Calc | 2.76000, | Rep   | 2.755(4) | ..... | Senseless s.u. |
| C(14)-H(6)                     | 1.555    | 1.555 | .....    | #     | 94 Check       |
| PLAT754_ALERT_4_C Contact Calc | 3.21000, | Rep   | 3.214(5) | ..... | Senseless s.u. |
| C(14)-H(7)                     | 1.555    | 1.555 | .....    | #     | 94 Check       |
| PLAT754_ALERT_4_C Contact Calc | 2.05000, | Rep   | 2.048(4) | ..... | Senseless s.u. |
| C(14)-H(9)                     | 1.555    | 1.555 | .....    | #     | 94 Check       |
| PLAT754_ALERT_4_C Contact Calc | 2.04000, | Rep   | 2.043(4) | ..... | Senseless s.u. |
| C(14)-H(10)                    | 1.555    | 1.555 | .....    | #     | 94 Check       |
| PLAT754_ALERT_4_C Contact Calc | 2.08000, | Rep   | 2.076(4) | ..... | Senseless s.u. |

|                                |          |       |          |       |                |
|--------------------------------|----------|-------|----------|-------|----------------|
| C(14)-H(12)                    | 1.555    | 1.555 | .....    | #     | 94 Check       |
| PLAT754_ALERT_4_C Contact Calc | 2.08000, | Rep   | 2.081(4) | ..... | Senseless s.u. |
| C(14)-H(13)                    | 1.555    | 1.555 | .....    | #     | 94 Check       |
| PLAT754_ALERT_4_C Contact Calc | 2.93000, | Rep   | 2.932(4) | ..... | Senseless s.u. |
| C(14)-H(14)                    | 1.555    | 1.555 | .....    | #     | 94 Check       |
| PLAT754_ALERT_4_C Contact Calc | 3.36000, | Rep   | 3.364(4) | ..... | Senseless s.u. |
| C(15)-H(6)                     | 1.555    | 1.555 | .....    | #     | 94 Check       |
| PLAT754_ALERT_4_C Contact Calc | 2.76000, | Rep   | 2.756(4) | ..... | Senseless s.u. |
| C(15)-H(9)                     | 1.555    | 1.555 | .....    | #     | 94 Check       |
| PLAT754_ALERT_4_C Contact Calc | 3.32000, | Rep   | 3.315(4) | ..... | Senseless s.u. |
| C(15)-H(10)                    | 1.555    | 1.555 | .....    | #     | 94 Check       |
| PLAT754_ALERT_4_C Contact Calc | 2.10000, | Rep   | 2.097(4) | ..... | Senseless s.u. |
| C(15)-H(11)                    | 1.555    | 1.555 | .....    | #     | 94 Check       |
| PLAT754_ALERT_4_C Contact Calc | 2.03000, | Rep   | 2.029(5) | ..... | Senseless s.u. |
| C(15)-H(14)                    | 1.555    | 1.555 | .....    | #     | 94 Check       |
| PLAT754_ALERT_4_C Contact Calc | 2.92000, | Rep   | 2.920(4) | ..... | Senseless s.u. |
| C(15)-H(19)                    | 1.555    | 1.555 | .....    | #     | 94 Check       |
| PLAT754_ALERT_4_C Contact Calc | 3.25000, | Rep   | 3.250(4) | ..... | Senseless s.u. |
| C(15)-H(22)                    | 1.555    | 3.766 | .....    | #     | 94 Check       |
| PLAT754_ALERT_4_C Contact Calc | 3.39000, | Rep   | 3.390(4) | ..... | Senseless s.u. |
| C(15)-H(30)                    | 1.555    | 1.545 | .....    | #     | 94 Check       |
| PLAT754_ALERT_4_C Contact Calc | 3.11000, | Rep   | 3.105(6) | ..... | Senseless s.u. |
| C(16)-H(1)                     | 1.555    | 1.555 | .....    | #     | 94 Check       |
| PLAT754_ALERT_4_C Contact Calc | 3.38000, | Rep   | 3.375(4) | ..... | Senseless s.u. |
| C(16)-H(7)                     | 1.555    | 1.555 | .....    | #     | 94 Check       |
| PLAT754_ALERT_4_C Contact Calc | 2.80000, | Rep   | 2.799(4) | ..... | Senseless s.u. |
| C(16)-H(8)                     | 1.555    | 1.555 | .....    | #     | 94 Check       |
| PLAT754_ALERT_4_C Contact Calc | 3.23000, | Rep   | 3.233(5) | ..... | Senseless s.u. |
| C(16)-H(11)                    | 1.555    | 1.555 | .....    | #     | 94 Check       |
| PLAT754_ALERT_4_C Contact Calc | 2.07000, | Rep   | 2.074(5) | ..... | Senseless s.u. |
| C(16)-H(12)                    | 1.555    | 1.555 | .....    | #     | 94 Check       |
| PLAT754_ALERT_4_C Contact Calc | 2.08000, | Rep   | 2.084(5) | ..... | Senseless s.u. |
| C(16)-H(13)                    | 1.555    | 1.555 | .....    | #     | 94 Check       |
| PLAT754_ALERT_4_C Contact Calc | 2.62000, | Rep   | 2.621(5) | ..... | Senseless s.u. |
| C(16)-H(15)                    | 1.555    | 1.555 | .....    | #     | 94 Check       |
| PLAT754_ALERT_4_C Contact Calc | 2.72000, | Rep   | 2.719(4) | ..... | Senseless s.u. |
| C(16)-H(19)                    | 1.555    | 1.555 | .....    | #     | 94 Check       |
| PLAT754_ALERT_4_C Contact Calc | 3.44000, | Rep   | 3.438(4) | ..... | Senseless s.u. |
| C(16)-H(22)                    | 1.555    | 3.766 | .....    | #     | 94 Check       |
| PLAT754_ALERT_4_C Contact Calc | 3.41000, | Rep   | 3.414(5) | ..... | Senseless s.u. |
| C(17)-H(1)                     | 1.555    | 1.555 | .....    | #     | 94 Check       |
| PLAT754_ALERT_4_C Contact Calc | 2.82000, | Rep   | 2.824(4) | ..... | Senseless s.u. |
| C(17)-H(8)                     | 1.555    | 1.555 | .....    | #     | 94 Check       |
| PLAT754_ALERT_4_C Contact Calc | 2.64000, | Rep   | 2.642(5) | ..... | Senseless s.u. |
| C(17)-H(12)                    | 1.555    | 1.555 | .....    | #     | 94 Check       |
| PLAT754_ALERT_4_C Contact Calc | 3.13000, | Rep   | 3.128(5) | ..... | Senseless s.u. |
| C(17)-H(13)                    | 1.555    | 1.555 | .....    | #     | 94 Check       |
| PLAT754_ALERT_4_C Contact Calc | 2.00000, | Rep   | 2.003(4) | ..... | Senseless s.u. |
| C(17)-H(14)                    | 1.555    | 1.555 | .....    | #     | 94 Check       |
| PLAT754_ALERT_4_C Contact Calc | 2.02000, | Rep   | 2.017(5) | ..... | Senseless s.u. |
| C(17)-H(15)                    | 1.555    | 1.555 | .....    | #     | 94 Check       |
| PLAT754_ALERT_4_C Contact Calc | 3.27000, | Rep   | 3.268(5) | ..... | Senseless s.u. |
| C(17)-H(16)                    | 1.555    | 1.555 | .....    | #     | 94 Check       |
| PLAT754_ALERT_4_C Contact Calc | 3.27000, | Rep   | 3.273(4) | ..... | Senseless s.u. |
| C(17)-H(18)                    | 1.555    | 1.555 | .....    | #     | 94 Check       |
| PLAT754_ALERT_4_C Contact Calc | 2.03000, | Rep   | 2.028(5) | ..... | Senseless s.u. |
| C(17)-H(19)                    | 1.555    | 1.555 | .....    | #     | 94 Check       |
| PLAT754_ALERT_4_C Contact Calc | 3.04000, | Rep   | 3.042(5) | ..... | Senseless s.u. |
| C(17)-H(25)                    | 1.555    | 1.545 | .....    | #     | 94 Check       |
| PLAT754_ALERT_4_C Contact Calc | 3.56000, | Rep   | 3.559(6) | ..... | Senseless s.u. |
| C(17)-H(30)                    | 1.555    | 1.545 | .....    | #     | 94 Check       |
| PLAT754_ALERT_4_C Contact Calc | 2.48000, | Rep   | 2.476(4) | ..... | Senseless s.u. |

|                                |          |       |          |       |                |
|--------------------------------|----------|-------|----------|-------|----------------|
| C(18)-H(14)                    | 1.555    | 1.555 | .....    | #     | 94 Check       |
| PLAT754_ALERT_4_C Contact Calc | 2.05000, | Rep   | 2.053(5) | ..... | Senseless s.u. |
| C(18)-H(16)                    | 1.555    | 1.555 | .....    | #     | 94 Check       |
| PLAT754_ALERT_4_C Contact Calc | 3.26000, | Rep   | 3.258(4) | ..... | Senseless s.u. |
| C(18)-H(17)                    | 1.555    | 1.555 | .....    | #     | 94 Check       |
| PLAT754_ALERT_4_C Contact Calc | 3.23000, | Rep   | 3.227(5) | ..... | Senseless s.u. |
| C(18)-H(19)                    | 1.555    | 1.555 | .....    | #     | 94 Check       |
| PLAT754_ALERT_4_C Contact Calc | 3.24000, | Rep   | 3.243(5) | ..... | Senseless s.u. |
| C(18)-H(24)                    | 1.555    | 1.545 | .....    | #     | 94 Check       |
| PLAT754_ALERT_4_C Contact Calc | 3.14000, | Rep   | 3.144(6) | ..... | Senseless s.u. |
| C(18)-H(25)                    | 1.555    | 1.545 | .....    | #     | 94 Check       |
| PLAT754_ALERT_4_C Contact Calc | 3.28000, | Rep   | 3.282(5) | ..... | Senseless s.u. |
| C(19)-H(1)                     | 1.555    | 3.656 | .....    | #     | 94 Check       |
| PLAT754_ALERT_4_C Contact Calc | 3.57000, | Rep   | 3.574(7) | ..... | Senseless s.u. |
| C(19)-H(8)                     | 1.555    | 3.656 | .....    | #     | 94 Check       |
| PLAT754_ALERT_4_C Contact Calc | 2.05000, | Rep   | 2.048(5) | ..... | Senseless s.u. |
| C(19)-H(15)                    | 1.555    | 1.555 | .....    | #     | 94 Check       |
| PLAT754_ALERT_4_C Contact Calc | 2.02000, | Rep   | 2.020(5) | ..... | Senseless s.u. |
| C(19)-H(17)                    | 1.555    | 1.555 | .....    | #     | 94 Check       |
| PLAT754_ALERT_4_C Contact Calc | 3.23000, | Rep   | 3.227(6) | ..... | Senseless s.u. |
| C(19)-H(18)                    | 1.555    | 1.555 | .....    | #     | 94 Check       |
| PLAT754_ALERT_4_C Contact Calc | 3.28000, | Rep   | 3.276(5) | ..... | Senseless s.u. |
| C(19)-H(24)                    | 1.555    | 1.545 | .....    | #     | 94 Check       |
| PLAT754_ALERT_4_C Contact Calc | 3.50000, | Rep   | 3.498(7) | ..... | Senseless s.u. |
| C(19)-H(25)                    | 1.555    | 1.545 | .....    | #     | 94 Check       |
| PLAT754_ALERT_4_C Contact Calc | 2.76000, | Rep   | 2.764(6) | ..... | Senseless s.u. |
| C(20)-H(1)                     | 1.555    | 3.656 | .....    | #     | 94 Check       |
| PLAT754_ALERT_4_C Contact Calc | 3.26000, | Rep   | 3.255(5) | ..... | Senseless s.u. |
| C(20)-H(15)                    | 1.555    | 1.555 | .....    | #     | 94 Check       |
| PLAT754_ALERT_4_C Contact Calc | 2.02000, | Rep   | 2.025(6) | ..... | Senseless s.u. |
| C(20)-H(16)                    | 1.555    | 1.555 | .....    | #     | 94 Check       |
| PLAT754_ALERT_4_C Contact Calc | 2.01000, | Rep   | 2.007(6) | ..... | Senseless s.u. |
| C(20)-H(18)                    | 1.555    | 1.555 | .....    | #     | 94 Check       |
| PLAT754_ALERT_4_C Contact Calc | 3.24000, | Rep   | 3.236(6) | ..... | Senseless s.u. |
| C(20)-H(19)                    | 1.555    | 1.555 | .....    | #     | 94 Check       |
| PLAT754_ALERT_4_C Contact Calc | 3.45000, | Rep   | 3.449(7) | ..... | Senseless s.u. |
| C(20)-H(31)                    | 1.555    | 1.545 | .....    | #     | 94 Check       |
| PLAT754_ALERT_4_C Contact Calc | 3.25000, | Rep   | 3.249(7) | ..... | Senseless s.u. |
| C(21)-H(1)                     | 1.555    | 3.656 | .....    | #     | 94 Check       |
| PLAT754_ALERT_4_C Contact Calc | 3.53000, | Rep   | 3.528(5) | ..... | Senseless s.u. |
| C(21)-H(9)                     | 1.555    | 2.645 | .....    | #     | 94 Check       |
| PLAT754_ALERT_4_C Contact Calc | 3.23000, | Rep   | 3.230(6) | ..... | Senseless s.u. |
| C(21)-H(16)                    | 1.555    | 1.555 | .....    | #     | 94 Check       |
| PLAT754_ALERT_4_C Contact Calc | 2.01000, | Rep   | 2.014(6) | ..... | Senseless s.u. |
| C(21)-H(17)                    | 1.555    | 1.555 | .....    | #     | 94 Check       |
| PLAT754_ALERT_4_C Contact Calc | 2.03000, | Rep   | 2.034(5) | ..... | Senseless s.u. |
| C(21)-H(19)                    | 1.555    | 1.555 | .....    | #     | 94 Check       |
| PLAT754_ALERT_4_C Contact Calc | 3.55000, | Rep   | 3.552(6) | ..... | Senseless s.u. |
| C(21)-H(30)                    | 1.555    | 1.545 | .....    | #     | 94 Check       |
| PLAT754_ALERT_4_C Contact Calc | 2.99000, | Rep   | 2.985(6) | ..... | Senseless s.u. |
| C(21)-H(31)                    | 1.555    | 1.545 | .....    | #     | 94 Check       |
| PLAT754_ALERT_4_C Contact Calc | 2.81000, | Rep   | 2.808(5) | ..... | Senseless s.u. |
| C(22)-H(8)                     | 1.555    | 1.555 | .....    | #     | 94 Check       |
| PLAT754_ALERT_4_C Contact Calc | 3.58000, | Rep   | 3.586(5) | ..... | Senseless s.u. |
| C(22)-H(10)                    | 1.555    | 2.645 | .....    | #     | 94 Check       |
| PLAT754_ALERT_4_C Contact Calc | 2.74000, | Rep   | 2.740(5) | ..... | Senseless s.u. |
| C(22)-H(12)                    | 1.555    | 1.555 | .....    | #     | 94 Check       |
| PLAT754_ALERT_4_C Contact Calc | 3.26000, | Rep   | 3.265(4) | ..... | Senseless s.u. |
| C(22)-H(14)                    | 1.555    | 1.555 | .....    | #     | 94 Check       |
| PLAT754_ALERT_4_C Contact Calc | 3.23000, | Rep   | 3.229(5) | ..... | Senseless s.u. |
| C(22)-H(15)                    | 1.555    | 1.555 | .....    | #     | 94 Check       |
| PLAT754_ALERT_4_C Contact Calc | 3.24000, | Rep   | 3.242(5) | ..... | Senseless s.u. |

|                                |          |       |          |       |                |
|--------------------------------|----------|-------|----------|-------|----------------|
| C(22)-H(17)                    | 1.555    | 1.555 | .....    | #     | 94 Check       |
| PLAT754_ALERT_4_C Contact Calc | 2.04000, | Rep   | 2.043(4) | ..... | Senseless s.u. |
| C(22)-H(18)                    | 1.555    | 1.555 | .....    | #     | 94 Check       |
| PLAT754_ALERT_4_C Contact Calc | 3.30000, | Rep   | 3.301(4) | ..... | Senseless s.u. |
| C(22)-H(25)                    | 1.555    | 1.545 | .....    | #     | 94 Check       |
| PLAT754_ALERT_4_C Contact Calc | 3.08000, | Rep   | 3.084(6) | ..... | Senseless s.u. |
| C(22)-H(30)                    | 1.555    | 1.545 | .....    | #     | 94 Check       |
| PLAT754_ALERT_4_C Contact Calc | 3.48000, | Rep   | 3.476(5) | ..... | Senseless s.u. |
| C(22)-H(31)                    | 1.555    | 1.545 | .....    | #     | 94 Check       |
| PLAT754_ALERT_4_C Contact Calc | 3.35000, | Rep   | 3.352(5) | ..... | Senseless s.u. |
| C(23)-H(20)                    | 1.555    | 1.555 | .....    | #     | 94 Check       |
| PLAT754_ALERT_4_C Contact Calc | 2.70000, | Rep   | 2.702(5) | ..... | Senseless s.u. |
| C(23)-H(25)                    | 1.555    | 1.555 | .....    | #     | 94 Check       |
| PLAT754_ALERT_4_C Contact Calc | 3.34000, | Rep   | 3.338(5) | ..... | Senseless s.u. |
| C(23)-H(26)                    | 1.555    | 1.555 | .....    | #     | 94 Check       |
| PLAT754_ALERT_4_C Contact Calc | 2.68000, | Rep   | 2.680(6) | ..... | Senseless s.u. |
| C(23)-H(27)                    | 1.555    | 1.555 | .....    | #     | 94 Check       |
| PLAT754_ALERT_4_C Contact Calc | 2.62000, | Rep   | 2.622(4) | ..... | Senseless s.u. |
| C(23)-H(28)                    | 1.555    | 1.555 | .....    | #     | 94 Check       |
| PLAT754_ALERT_4_C Contact Calc | 3.32000, | Rep   | 3.324(4) | ..... | Senseless s.u. |
| C(23)-H(29)                    | 1.555    | 1.555 | .....    | #     | 94 Check       |
| PLAT754_ALERT_4_C Contact Calc | 2.09000, | Rep   | 2.088(4) | ..... | Senseless s.u. |
| C(23)-H(30)                    | 1.555    | 1.555 | .....    | #     | 94 Check       |
| PLAT754_ALERT_4_C Contact Calc | 2.83000, | Rep   | 2.827(5) | ..... | Senseless s.u. |
| C(23)-H(31)                    | 1.555    | 1.555 | .....    | #     | 94 Check       |
| PLAT754_ALERT_4_C Contact Calc | 3.18000, | Rep   | 3.183(4) | ..... | Senseless s.u. |
| C(23)-H(32)                    | 1.555    | 1.555 | .....    | #     | 94 Check       |
| PLAT754_ALERT_4_C Contact Calc | 2.14000, | Rep   | 2.139(5) | ..... | Senseless s.u. |
| C(24)-H(20)                    | 1.555    | 1.555 | .....    | #     | 94 Check       |
| PLAT754_ALERT_4_C Contact Calc | 3.32000, | Rep   | 3.318(4) | ..... | Senseless s.u. |
| C(24)-H(21)                    | 1.555    | 1.555 | .....    | #     | 94 Check       |
| PLAT754_ALERT_4_C Contact Calc | 2.04000, | Rep   | 2.039(5) | ..... | Senseless s.u. |
| C(24)-H(26)                    | 1.555    | 1.555 | .....    | #     | 94 Check       |
| PLAT754_ALERT_4_C Contact Calc | 2.03000, | Rep   | 2.029(5) | ..... | Senseless s.u. |
| C(24)-H(27)                    | 1.555    | 1.555 | .....    | #     | 94 Check       |
| PLAT754_ALERT_4_C Contact Calc | 3.16000, | Rep   | 3.164(4) | ..... | Senseless s.u. |
| C(24)-H(28)                    | 1.555    | 1.555 | .....    | #     | 94 Check       |
| PLAT754_ALERT_4_C Contact Calc | 3.22000, | Rep   | 3.221(5) | ..... | Senseless s.u. |
| C(24)-H(30)                    | 1.555    | 1.555 | .....    | #     | 94 Check       |
| PLAT754_ALERT_4_C Contact Calc | 3.13000, | Rep   | 3.129(5) | ..... | Senseless s.u. |
| C(24)-H(31)                    | 1.555    | 1.555 | .....    | #     | 94 Check       |
| PLAT754_ALERT_4_C Contact Calc | 3.06000, | Rep   | 3.058(5) | ..... | Senseless s.u. |
| C(24)-H(32)                    | 1.555    | 1.555 | .....    | #     | 94 Check       |
| PLAT754_ALERT_4_C Contact Calc | 1.97000, | Rep   | 1.973(4) | ..... | Senseless s.u. |
| C(25)-H(21)                    | 1.555    | 1.555 | .....    | #     | 94 Check       |
| PLAT754_ALERT_4_C Contact Calc | 2.66000, | Rep   | 2.658(5) | ..... | Senseless s.u. |
| C(25)-H(26)                    | 1.555    | 1.555 | .....    | #     | 94 Check       |
| PLAT754_ALERT_4_C Contact Calc | 2.68000, | Rep   | 2.682(5) | ..... | Senseless s.u. |
| C(25)-H(27)                    | 1.555    | 1.555 | .....    | #     | 94 Check       |
| PLAT754_ALERT_4_C Contact Calc | 1.98000, | Rep   | 1.981(6) | ..... | Senseless s.u. |
| C(26)-H(20)                    | 1.555    | 1.555 | .....    | #     | 94 Check       |
| PLAT754_ALERT_4_C Contact Calc | 2.65000, | Rep   | 2.652(6) | ..... | Senseless s.u. |
| C(26)-H(22)                    | 1.555    | 1.555 | .....    | #     | 94 Check       |
| PLAT754_ALERT_4_C Contact Calc | 3.03000, | Rep   | 3.033(5) | ..... | Senseless s.u. |
| C(27)-H(5)                     | 1.555    | 1.555 | .....    | #     | 94 Check       |
| PLAT754_ALERT_4_C Contact Calc | 3.06000, | Rep   | 3.063(4) | ..... | Senseless s.u. |
| C(27)-H(13)                    | 1.555    | 3.766 | .....    | #     | 94 Check       |
| PLAT754_ALERT_4_C Contact Calc | 3.36000, | Rep   | 3.360(5) | ..... | Senseless s.u. |
| C(27)-H(14)                    | 1.555    | 3.766 | .....    | #     | 94 Check       |
| PLAT754_ALERT_4_C Contact Calc | 2.69000, | Rep   | 2.686(7) | ..... | Senseless s.u. |
| C(27)-H(21)                    | 1.555    | 1.555 | .....    | #     | 94 Check       |
| PLAT754_ALERT_4_C Contact Calc | 2.03000, | Rep   | 2.026(6) | ..... | Senseless s.u. |

|                                |          |       |          |       |                |
|--------------------------------|----------|-------|----------|-------|----------------|
| C(27)-H(23)                    | 1.555    | 1.555 | .....    | #     | 94 Check       |
| PLAT754_ALERT_4_C Contact Calc | 3.24000, | Rep   | 3.241(6) | ..... | Senseless s.u. |
| C(27)-H(24)                    | 1.555    | 1.555 | .....    | #     | 94 Check       |
| PLAT754_ALERT_4_C Contact Calc | 3.38000, | Rep   | 3.381(6) | ..... | Senseless s.u. |
| C(28)-H(4)                     | 1.555    | 1.555 | .....    | #     | 94 Check       |
| PLAT754_ALERT_4_C Contact Calc | 3.04000, | Rep   | 3.042(4) | ..... | Senseless s.u. |
| C(28)-H(5)                     | 1.555    | 1.555 | .....    | #     | 94 Check       |
| PLAT754_ALERT_4_C Contact Calc | 3.22000, | Rep   | 3.224(4) | ..... | Senseless s.u. |
| C(28)-H(13)                    | 1.555    | 3.766 | .....    | #     | 94 Check       |
| PLAT754_ALERT_4_C Contact Calc | 2.01000, | Rep   | 2.013(6) | ..... | Senseless s.u. |
| C(28)-H(22)                    | 1.555    | 1.555 | .....    | #     | 94 Check       |
| PLAT754_ALERT_4_C Contact Calc | 2.03000, | Rep   | 2.029(6) | ..... | Senseless s.u. |
| C(28)-H(24)                    | 1.555    | 1.555 | .....    | #     | 94 Check       |
| PLAT754_ALERT_4_C Contact Calc | 3.25000, | Rep   | 3.250(4) | ..... | Senseless s.u. |
| C(28)-H(25)                    | 1.555    | 1.555 | .....    | #     | 94 Check       |
| PLAT754_ALERT_4_C Contact Calc | 3.55000, | Rep   | 3.545(4) | ..... | Senseless s.u. |
| C(28)-H(25)                    | 1.555    | 3.776 | .....    | #     | 94 Check       |
| PLAT754_ALERT_4_C Contact Calc | 3.39000, | Rep   | 3.390(5) | ..... | Senseless s.u. |
| C(29)-H(4)                     | 1.555    | 1.555 | .....    | #     | 94 Check       |
| PLAT754_ALERT_4_C Contact Calc | 3.09000, | Rep   | 3.095(4) | ..... | Senseless s.u. |
| C(29)-H(5)                     | 1.555    | 1.555 | .....    | #     | 94 Check       |
| PLAT754_ALERT_4_C Contact Calc | 3.24000, | Rep   | 3.236(5) | ..... | Senseless s.u. |
| C(29)-H(22)                    | 1.555    | 1.555 | .....    | #     | 94 Check       |
| PLAT754_ALERT_4_C Contact Calc | 2.03000, | Rep   | 2.026(4) | ..... | Senseless s.u. |
| C(29)-H(23)                    | 1.555    | 1.555 | .....    | #     | 94 Check       |
| PLAT754_ALERT_4_C Contact Calc | 2.04000, | Rep   | 2.037(4) | ..... | Senseless s.u. |
| C(29)-H(25)                    | 1.555    | 1.555 | .....    | #     | 94 Check       |
| PLAT754_ALERT_4_C Contact Calc | 3.15000, | Rep   | 3.153(4) | ..... | Senseless s.u. |
| C(30)-H(5)                     | 1.555    | 1.555 | .....    | #     | 94 Check       |
| PLAT754_ALERT_4_C Contact Calc | 3.25000, | Rep   | 3.248(4) | ..... | Senseless s.u. |
| C(30)-H(23)                    | 1.555    | 1.555 | .....    | #     | 94 Check       |
| PLAT754_ALERT_4_C Contact Calc | 2.04000, | Rep   | 2.040(6) | ..... | Senseless s.u. |
| C(30)-H(24)                    | 1.555    | 1.555 | .....    | #     | 94 Check       |
| PLAT754_ALERT_4_C Contact Calc | 2.78000, | Rep   | 2.776(4) | ..... | Senseless s.u. |
| C(30)-H(30)                    | 1.555    | 1.555 | .....    | #     | 94 Check       |
| PLAT754_ALERT_4_C Contact Calc | 3.10000, | Rep   | 3.100(4) | ..... | Senseless s.u. |
| C(30)-H(31)                    | 1.555    | 1.555 | .....    | #     | 94 Check       |
| PLAT754_ALERT_4_C Contact Calc | 3.15000, | Rep   | 3.147(5) | ..... | Senseless s.u. |
| C(31)-H(5)                     | 1.555    | 1.555 | .....    | #     | 94 Check       |
| PLAT754_ALERT_4_C Contact Calc | 3.31000, | Rep   | 3.306(5) | ..... | Senseless s.u. |
| C(31)-H(21)                    | 1.555    | 1.555 | .....    | #     | 94 Check       |
| PLAT754_ALERT_4_C Contact Calc | 3.25000, | Rep   | 3.251(4) | ..... | Senseless s.u. |
| C(31)-H(22)                    | 1.555    | 1.555 | .....    | #     | 94 Check       |
| PLAT754_ALERT_4_C Contact Calc | 3.26000, | Rep   | 3.257(6) | ..... | Senseless s.u. |
| C(31)-H(24)                    | 1.555    | 1.555 | .....    | #     | 94 Check       |
| PLAT754_ALERT_4_C Contact Calc | 2.02000, | Rep   | 2.021(5) | ..... | Senseless s.u. |
| C(31)-H(25)                    | 1.555    | 1.555 | .....    | #     | 94 Check       |
| PLAT754_ALERT_4_C Contact Calc | 2.77000, | Rep   | 2.774(4) | ..... | Senseless s.u. |
| C(31)-H(30)                    | 1.555    | 1.555 | .....    | #     | 94 Check       |
| PLAT754_ALERT_4_C Contact Calc | 2.99000, | Rep   | 2.992(4) | ..... | Senseless s.u. |
| C(31)-H(31)                    | 1.555    | 1.555 | .....    | #     | 94 Check       |
| PLAT754_ALERT_4_C Contact Calc | 3.10000, | Rep   | 3.098(5) | ..... | Senseless s.u. |
| C(32)-H(5)                     | 1.555    | 1.555 | .....    | #     | 94 Check       |
| PLAT754_ALERT_4_C Contact Calc | 3.30000, | Rep   | 3.297(6) | ..... | Senseless s.u. |
| C(32)-H(20)                    | 1.555    | 1.555 | .....    | #     | 94 Check       |
| PLAT754_ALERT_4_C Contact Calc | 2.08000, | Rep   | 2.084(6) | ..... | Senseless s.u. |
| C(32)-H(21)                    | 1.555    | 1.555 | .....    | #     | 94 Check       |
| PLAT754_ALERT_4_C Contact Calc | 2.03000, | Rep   | 2.025(4) | ..... | Senseless s.u. |
| C(32)-H(22)                    | 1.555    | 1.555 | .....    | #     | 94 Check       |
| PLAT754_ALERT_4_C Contact Calc | 3.26000, | Rep   | 3.261(6) | ..... | Senseless s.u. |
| C(32)-H(23)                    | 1.555    | 1.555 | .....    | #     | 94 Check       |
| PLAT754_ALERT_4_C Contact Calc | 3.27000, | Rep   | 3.268(5) | ..... | Senseless s.u. |

|                                |          |       |          |       |                |
|--------------------------------|----------|-------|----------|-------|----------------|
| C(32)-H(25)                    | 1.555    | 1.555 | .....    | #     | 94 Check       |
| PLAT754_ALERT_4_C Contact Calc | 3.50000, | Rep   | 3.496(6) | ..... | Senseless s.u. |
| C(33)-H(20)                    | 1.555    | 2.755 | .....    | #     | 94 Check       |
| PLAT754_ALERT_4_C Contact Calc | 3.22000, | Rep   | 3.219(5) | ..... | Senseless s.u. |
| C(33)-H(23)                    | 1.555    | 3.776 | .....    | #     | 94 Check       |
| PLAT754_ALERT_4_C Contact Calc | 3.29000, | Rep   | 3.286(4) | ..... | Senseless s.u. |
| C(33)-H(24)                    | 1.555    | 3.776 | .....    | #     | 94 Check       |
| PLAT754_ALERT_4_C Contact Calc | 3.37000, | Rep   | 3.367(6) | ..... | Senseless s.u. |
| C(33)-H(25)                    | 1.555    | 1.555 | .....    | #     | 94 Check       |
| PLAT754_ALERT_4_C Contact Calc | 2.56000, | Rep   | 2.557(5) | ..... | Senseless s.u. |
| C(33)-H(27)                    | 1.555    | 1.555 | .....    | #     | 94 Check       |
| PLAT754_ALERT_4_C Contact Calc | 2.48000, | Rep   | 2.480(4) | ..... | Senseless s.u. |
| C(33)-H(28)                    | 1.555    | 1.555 | .....    | #     | 94 Check       |
| PLAT754_ALERT_4_C Contact Calc | 2.84000, | Rep   | 2.838(5) | ..... | Senseless s.u. |
| C(33)-H(30)                    | 1.555    | 1.555 | .....    | #     | 94 Check       |
| PLAT754_ALERT_4_C Contact Calc | 3.50000, | Rep   | 3.497(5) | ..... | Senseless s.u. |
| C(34)-H(3)                     | 1.555    | 4.564 | .....    | #     | 94 Check       |
| PLAT754_ALERT_4_C Contact Calc | 3.30000, | Rep   | 3.304(6) | ..... | Senseless s.u. |
| C(34)-H(4)                     | 1.555    | 4.564 | .....    | #     | 94 Check       |
| PLAT754_ALERT_4_C Contact Calc | 3.56000, | Rep   | 3.561(5) | ..... | Senseless s.u. |
| C(34)-H(16)                    | 1.555    | 4.554 | .....    | #     | 94 Check       |
| PLAT754_ALERT_4_C Contact Calc | 2.64000, | Rep   | 2.643(4) | ..... | Senseless s.u. |
| C(34)-H(20)                    | 1.555    | 1.555 | .....    | #     | 94 Check       |
| PLAT754_ALERT_4_C Contact Calc | 2.63000, | Rep   | 2.626(5) | ..... | Senseless s.u. |
| C(34)-H(28)                    | 1.555    | 1.555 | .....    | #     | 94 Check       |
| PLAT754_ALERT_4_C Contact Calc | 3.19000, | Rep   | 3.185(6) | ..... | Senseless s.u. |
| C(34)-H(29)                    | 1.555    | 1.555 | .....    | #     | 94 Check       |
| PLAT754_ALERT_4_C Contact Calc | 3.35000, | Rep   | 3.348(6) | ..... | Senseless s.u. |
| C(34)-H(32)                    | 1.555    | 1.555 | .....    | #     | 94 Check       |
| PLAT754_ALERT_4_C Contact Calc | 2.94000, | Rep   | 2.937(6) | ..... | Senseless s.u. |
| C(35)-H(3)                     | 1.555    | 4.564 | .....    | #     | 94 Check       |
| PLAT754_ALERT_4_C Contact Calc | 3.23000, | Rep   | 3.233(4) | ..... | Senseless s.u. |
| C(35)-H(7)                     | 1.555    | 2.655 | .....    | #     | 94 Check       |
| PLAT754_ALERT_4_C Contact Calc | 3.18000, | Rep   | 3.181(6) | ..... | Senseless s.u. |
| C(35)-H(26)                    | 1.555    | 1.555 | .....    | #     | 94 Check       |
| PLAT754_ALERT_4_C Contact Calc | 2.65000, | Rep   | 2.646(6) | ..... | Senseless s.u. |
| C(35)-H(27)                    | 1.555    | 1.555 | .....    | #     | 94 Check       |
| PLAT754_ALERT_4_C Contact Calc | 2.06000, | Rep   | 2.061(6) | ..... | Senseless s.u. |
| C(35)-H(30)                    | 1.555    | 1.555 | .....    | #     | 94 Check       |
| PLAT754_ALERT_4_C Contact Calc | 3.29000, | Rep   | 3.291(6) | ..... | Senseless s.u. |
| C(35)-H(31)                    | 1.555    | 1.555 | .....    | #     | 94 Check       |
| PLAT754_ALERT_4_C Contact Calc | 2.53000, | Rep   | 2.534(5) | ..... | Senseless s.u. |
| C(35)-H(32)                    | 1.555    | 1.555 | .....    | #     | 94 Check       |
| PLAT754_ALERT_4_C Contact Calc | 3.50000, | Rep   | 3.499(4) | ..... | Senseless s.u. |
| C(36)-H(12)                    | 1.555    | 1.565 | .....    | #     | 94 Check       |
| PLAT754_ALERT_4_C Contact Calc | 2.75000, | Rep   | 2.750(5) | ..... | Senseless s.u. |
| C(36)-H(25)                    | 1.555    | 1.555 | .....    | #     | 94 Check       |
| PLAT754_ALERT_4_C Contact Calc | 3.20000, | Rep   | 3.195(6) | ..... | Senseless s.u. |
| C(36)-H(27)                    | 1.555    | 1.555 | .....    | #     | 94 Check       |
| PLAT754_ALERT_4_C Contact Calc | 2.03000, | Rep   | 2.033(5) | ..... | Senseless s.u. |
| C(36)-H(28)                    | 1.555    | 1.555 | .....    | #     | 94 Check       |
| PLAT754_ALERT_4_C Contact Calc | 2.04000, | Rep   | 2.045(4) | ..... | Senseless s.u. |
| C(36)-H(29)                    | 1.555    | 1.555 | .....    | #     | 94 Check       |
| PLAT754_ALERT_4_C Contact Calc | 2.07000, | Rep   | 2.073(5) | ..... | Senseless s.u. |
| C(36)-H(31)                    | 1.555    | 1.555 | .....    | #     | 94 Check       |
| PLAT754_ALERT_4_C Contact Calc | 2.07000, | Rep   | 2.069(4) | ..... | Senseless s.u. |
| C(36)-H(32)                    | 1.555    | 1.555 | .....    | #     | 94 Check       |
| PLAT754_ALERT_4_C Contact Calc | 3.09000, | Rep   | 3.091(4) | ..... | Senseless s.u. |
| C(37)-H(6)                     | 1.555    | 1.555 | .....    | #     | 94 Check       |
| PLAT754_ALERT_4_C Contact Calc | 3.48000, | Rep   | 3.481(6) | ..... | Senseless s.u. |
| C(37)-H(18)                    | 1.555    | 1.565 | .....    | #     | 94 Check       |
| PLAT754_ALERT_4_C Contact Calc | 3.32000, | Rep   | 3.323(4) | ..... | Senseless s.u. |

|                                |          |       |          |       |                |
|--------------------------------|----------|-------|----------|-------|----------------|
| C(37)-H(25)                    | 1.555    | 1.555 | .....    | #     | 94 Check       |
| PLAT754_ALERT_4_C Contact Calc | 3.32000, | Rep   | 3.316(5) | ..... | Senseless s.u. |
| C(37)-H(28)                    | 1.555    | 1.555 | .....    | #     | 94 Check       |
| PLAT754_ALERT_4_C Contact Calc | 2.80000, | Rep   | 2.796(5) | ..... | Senseless s.u. |
| C(37)-H(29)                    | 1.555    | 1.555 | .....    | #     | 94 Check       |
| PLAT754_ALERT_4_C Contact Calc | 2.09000, | Rep   | 2.085(4) | ..... | Senseless s.u. |
| C(37)-H(30)                    | 1.555    | 1.555 | .....    | #     | 94 Check       |
| PLAT754_ALERT_4_C Contact Calc | 3.38000, | Rep   | 3.383(6) | ..... | Senseless s.u. |
| C(38)-H(5)                     | 1.555    | 1.555 | .....    | #     | 94 Check       |
| PLAT754_ALERT_4_C Contact Calc | 2.82000, | Rep   | 2.823(5) | ..... | Senseless s.u. |
| C(38)-H(6)                     | 1.555    | 1.555 | .....    | #     | 94 Check       |
| PLAT754_ALERT_4_C Contact Calc | 3.15000, | Rep   | 3.150(5) | ..... | Senseless s.u. |
| C(38)-H(20)                    | 1.555    | 1.555 | .....    | #     | 94 Check       |
| PLAT754_ALERT_4_C Contact Calc | 2.80000, | Rep   | 2.796(6) | ..... | Senseless s.u. |
| C(38)-H(26)                    | 1.555    | 1.555 | .....    | #     | 94 Check       |
| PLAT754_ALERT_4_C Contact Calc | 3.35000, | Rep   | 3.352(5) | ..... | Senseless s.u. |
| C(38)-H(27)                    | 1.555    | 1.555 | .....    | #     | 94 Check       |
| PLAT754_ALERT_4_C Contact Calc | 3.24000, | Rep   | 3.244(4) | ..... | Senseless s.u. |
| C(38)-H(30)                    | 1.555    | 1.555 | .....    | #     | 94 Check       |
| PLAT754_ALERT_4_C Contact Calc | 2.08000, | Rep   | 2.079(5) | ..... | Senseless s.u. |
| C(38)-H(31)                    | 1.555    | 1.555 | .....    | #     | 94 Check       |
| PLAT754_ALERT_4_C Contact Calc | 2.08000, | Rep   | 2.078(4) | ..... | Senseless s.u. |
| C(38)-H(32)                    | 1.555    | 1.555 | .....    | #     | 94 Check       |
| PLAT754_ALERT_4_C Contact Calc | 2.89000, | Rep   | 2.891(6) | ..... | Senseless s.u. |
| C(39)-H(6)                     | 1.555    | 1.555 | .....    | #     | 94 Check       |
| PLAT754_ALERT_4_C Contact Calc | 3.15000, | Rep   | 3.154(5) | ..... | Senseless s.u. |
| C(39)-H(11)                    | 1.555    | 1.555 | .....    | #     | 94 Check       |
| PLAT754_ALERT_4_C Contact Calc | 3.48000, | Rep   | 3.484(5) | ..... | Senseless s.u. |
| C(39)-H(20)                    | 1.555    | 1.555 | .....    | #     | 94 Check       |
| PLAT754_ALERT_4_C Contact Calc | 2.80000, | Rep   | 2.796(5) | ..... | Senseless s.u. |
| C(39)-H(26)                    | 1.555    | 1.555 | .....    | #     | 94 Check       |
| PLAT754_ALERT_4_C Contact Calc | 3.15000, | Rep   | 3.150(5) | ..... | Senseless s.u. |
| C(39)-H(31)                    | 1.555    | 1.555 | .....    | #     | 94 Check       |
| PLAT754_ALERT_4_C Contact Calc | 2.65000, | Rep   | 2.653(4) | ..... | Senseless s.u. |
| C(39)-H(32)                    | 1.555    | 1.555 | .....    | #     | 94 Check       |
| PLAT754_ALERT_4_C Contact Calc | 3.07000, | Rep   | 3.069(6) | ..... | Senseless s.u. |
| C(40)-H(6)                     | 1.555    | 1.555 | .....    | #     | 94 Check       |
| PLAT754_ALERT_4_C Contact Calc | 3.24000, | Rep   | 3.239(6) | ..... | Senseless s.u. |
| C(40)-H(11)                    | 1.555    | 1.555 | .....    | #     | 94 Check       |
| PLAT754_ALERT_4_C Contact Calc | 3.47000, | Rep   | 3.469(5) | ..... | Senseless s.u. |
| C(40)-H(20)                    | 1.555    | 1.555 | .....    | #     | 94 Check       |
| PLAT754_ALERT_4_C Contact Calc | 3.48000, | Rep   | 3.481(5) | ..... | Senseless s.u. |
| C(40)-H(23)                    | 1.555    | 3.766 | .....    | #     | 94 Check       |
| PLAT754_ALERT_4_C Contact Calc | 3.54000, | Rep   | 3.536(5) | ..... | Senseless s.u. |
| C(40)-H(26)                    | 1.555    | 1.555 | .....    | #     | 94 Check       |
| PLAT754_ALERT_4_C Contact Calc | 3.34000, | Rep   | 3.338(7) | ..... | Senseless s.u. |
| C(41)-H(11)                    | 1.555    | 1.555 | .....    | #     | 94 Check       |
| PLAT754_ALERT_4_C Contact Calc | 3.49000, | Rep   | 3.493(7) | ..... | Senseless s.u. |
| C(41)-H(13)                    | 1.555    | 1.555 | .....    | #     | 94 Check       |
| PLAT754_ALERT_4_C Contact Calc | 3.34000, | Rep   | 3.338(7) | ..... | Senseless s.u. |
| C(41)-H(20)                    | 1.555    | 2.745 | .....    | #     | 94 Check       |
| PLAT754_ALERT_4_C Contact Calc | 3.36000, | Rep   | 3.357(6) | ..... | Senseless s.u. |
| C(41)-H(23)                    | 1.555    | 3.766 | .....    | #     | 94 Check       |
| PLAT754_ALERT_4_C Contact Calc | 3.34000, | Rep   | 3.343(7) | ..... | Senseless s.u. |
| C(42)-H(11)                    | 1.555    | 1.555 | .....    | #     | 94 Check       |
| PLAT754_ALERT_4_C Contact Calc | 3.53000, | Rep   | 3.526(5) | ..... | Senseless s.u. |
| C(43)-H(8)                     | 1.555    | 2.655 | .....    | #     | 94 Check       |
| PLAT754_ALERT_4_C Contact Calc | 3.57000, | Rep   | 3.570(6) | ..... | Senseless s.u. |
| C(43)-H(9)                     | 1.555    | 1.555 | .....    | #     | 94 Check       |
| PLAT754_ALERT_4_C Contact Calc | 3.23000, | Rep   | 3.234(6) | ..... | Senseless s.u. |
| C(43)-H(11)                    | 1.555    | 1.555 | .....    | #     | 94 Check       |
| PLAT754_ALERT_4_C Contact Calc | 3.18000, | Rep   | 3.184(7) | ..... | Senseless s.u. |

|                                |          |       |          |       |                |
|--------------------------------|----------|-------|----------|-------|----------------|
| C(43)-H(15)                    | 1.555    | 4.554 | .....    | #     | 94 Check       |
| PLAT754_ALERT_4_C Contact Calc | 3.27000, | Rep   | 3.271(4) | ..... | Senseless s.u. |
| C(44)-H(8)                     | 1.555    | 2.655 | .....    | #     | 94 Check       |
| PLAT754_ALERT_4_C Contact Calc | 3.13000, | Rep   | 3.129(6) | ..... | Senseless s.u. |
| C(44)-H(11)                    | 1.555    | 1.555 | .....    | #     | 94 Check       |
| PLAT754_ALERT_4_C Contact Calc | 3.47000, | Rep   | 3.470(6) | ..... | Senseless s.u. |
| C(44)-H(16)                    | 1.555    | 4.554 | .....    | #     | 94 Check       |
| PLAT754_ALERT_4_C Contact Calc | 3.07000, | Rep   | 3.068(6) | ..... | Senseless s.u. |
| C(44)-H(26)                    | 1.555    | 1.555 | .....    | #     | 94 Check       |
| PLAT754_ALERT_4_C Contact Calc | 2.65000, | Rep   | 2.652(5) | ..... | Senseless s.u. |
| C(44)-H(32)                    | 1.555    | 1.555 | .....    | #     | 94 Check       |
| PLAT754_ALERT_4_C Contact Calc | 3.36000, | Rep   | 3.357(6) | ..... | Senseless s.u. |
| H(1) -C(1)                     | 1.555    | 1.555 | .....    | #     | 94 Check       |
| PLAT754_ALERT_4_C Contact Calc | 2.13000, | Rep   | 2.126(6) | ..... | Senseless s.u. |
| H(1) -C(2)                     | 1.555    | 1.555 | .....    | #     | 94 Check       |
| PLAT754_ALERT_4_C Contact Calc | 1.96000, | Rep   | 1.965(5) | ..... | Senseless s.u. |
| H(1) -C(4)                     | 1.555    | 1.555 | .....    | #     | 94 Check       |
| PLAT754_ALERT_4_C Contact Calc | 3.28000, | Rep   | 3.284(5) | ..... | Senseless s.u. |
| H(1) -C(10)                    | 1.555    | 1.555 | .....    | #     | 94 Check       |
| PLAT754_ALERT_4_C Contact Calc | 2.64000, | Rep   | 2.635(6) | ..... | Senseless s.u. |
| H(1) -C(12)                    | 1.555    | 1.555 | .....    | #     | 94 Check       |
| PLAT754_ALERT_4_C Contact Calc | 3.11000, | Rep   | 3.105(6) | ..... | Senseless s.u. |
| H(1) -C(16)                    | 1.555    | 1.555 | .....    | #     | 94 Check       |
| PLAT754_ALERT_4_C Contact Calc | 3.41000, | Rep   | 3.414(5) | ..... | Senseless s.u. |
| H(1) -C(17)                    | 1.555    | 1.555 | .....    | #     | 94 Check       |
| PLAT754_ALERT_4_C Contact Calc | 3.28000, | Rep   | 3.282(5) | ..... | Senseless s.u. |
| H(1) -C(19)                    | 1.555    | 3.656 | .....    | #     | 94 Check       |
| PLAT754_ALERT_4_C Contact Calc | 2.76000, | Rep   | 2.764(6) | ..... | Senseless s.u. |
| H(1) -C(20)                    | 1.555    | 3.656 | .....    | #     | 94 Check       |
| PLAT754_ALERT_4_C Contact Calc | 3.25000, | Rep   | 3.249(7) | ..... | Senseless s.u. |
| H(1) -C(21)                    | 1.555    | 3.656 | .....    | #     | 94 Check       |
| PLAT754_ALERT_4_C Contact Calc | 2.25000, | Rep   | 2.248(5) | ..... | Senseless s.u. |
| H(1) -H(2)                     | 1.555    | 1.555 | .....    | #     | 94 Check       |
| PLAT754_ALERT_4_C Contact Calc | 2.76000, | Rep   | 2.759(6) | ..... | Senseless s.u. |
| H(1) -H(7)                     | 1.555    | 1.555 | .....    | #     | 94 Check       |
| PLAT754_ALERT_4_C Contact Calc | 2.48000, | Rep   | 2.479(6) | ..... | Senseless s.u. |
| H(1) -H(8)                     | 1.555    | 1.555 | .....    | #     | 94 Check       |
| PLAT754_ALERT_4_C Contact Calc | 3.25000, | Rep   | 3.246(5) | ..... | Senseless s.u. |
| H(1) -H(14)                    | 1.555    | 1.555 | .....    | #     | 94 Check       |
| PLAT754_ALERT_4_C Contact Calc | 3.53000, | Rep   | 3.526(4) | ..... | Senseless s.u. |
| H(1) -H(15)                    | 1.555    | 1.555 | .....    | #     | 94 Check       |
| PLAT754_ALERT_4_C Contact Calc | 3.49000, | Rep   | 3.487(5) | ..... | Senseless s.u. |
| H(1) -H(16)                    | 1.555    | 3.656 | .....    | #     | 94 Check       |
| PLAT754_ALERT_4_C Contact Calc | 2.62000, | Rep   | 2.618(6) | ..... | Senseless s.u. |
| H(1) -H(17)                    | 1.555    | 3.656 | .....    | #     | 94 Check       |
| PLAT754_ALERT_4_C Contact Calc | 3.44000, | Rep   | 3.439(7) | ..... | Senseless s.u. |
| H(1) -H(18)                    | 1.555    | 3.656 | .....    | #     | 94 Check       |
| PLAT754_ALERT_4_C Contact Calc | 2.66000, | Rep   | 2.659(6) | ..... | Senseless s.u. |
| H(2) -N(1)                     | 1.555    | 3.666 | .....    | #     | 94 Check       |
| PLAT754_ALERT_4_C Contact Calc | 3.31000, | Rep   | 3.312(6) | ..... | Senseless s.u. |
| H(2) -C(2)                     | 1.555    | 1.555 | .....    | #     | 94 Check       |
| PLAT754_ALERT_4_C Contact Calc | 1.97000, | Rep   | 1.967(5) | ..... | Senseless s.u. |
| H(2) -C(3)                     | 1.555    | 1.555 | .....    | #     | 94 Check       |
| PLAT754_ALERT_4_C Contact Calc | 2.68000, | Rep   | 2.684(6) | ..... | Senseless s.u. |
| H(2) -C(5)                     | 1.555    | 1.555 | .....    | #     | 94 Check       |
| PLAT754_ALERT_4_C Contact Calc | 3.30000, | Rep   | 3.303(6) | ..... | Senseless s.u. |
| H(2) -C(9)                     | 1.555    | 1.555 | .....    | #     | 94 Check       |
| PLAT754_ALERT_4_C Contact Calc | 2.09000, | Rep   | 2.088(6) | ..... | Senseless s.u. |
| H(2) -C(10)                    | 1.555    | 1.555 | .....    | #     | 94 Check       |
| PLAT754_ALERT_4_C Contact Calc | 3.36000, | Rep   | 3.360(6) | ..... | Senseless s.u. |
| H(2) -C(11)                    | 1.555    | 3.666 | .....    | #     | 94 Check       |
| PLAT754_ALERT_4_C Contact Calc | 2.25000, | Rep   | 2.248(5) | ..... | Senseless s.u. |



|                                |          |       |          |       |                |
|--------------------------------|----------|-------|----------|-------|----------------|
| H(2) -H(1)                     | 1.555    | 1.555 | .....    | #     | 94 Check       |
| PLAT754_ALERT_4_C Contact Calc | 2.50000, | Rep   | 2.503(5) | ..... | Senseless s.u. |
| H(2) -H(3)                     | 1.555    | 1.555 | .....    | #     | 94 Check       |
| PLAT754_ALERT_4_C Contact Calc | 3.55000, | Rep   | 3.550(5) | ..... | Senseless s.u. |
| H(2) -H(17)                    | 1.555    | 3.656 | .....    | #     | 94 Check       |
| PLAT754_ALERT_4_C Contact Calc | 2.73000, | Rep   | 2.730(4) | ..... | Senseless s.u. |
| H(3) -O(2)                     | 1.555    | 4.565 | .....    | #     | 94 Check       |
| PLAT754_ALERT_4_C Contact Calc | 2.66000, | Rep   | 2.657(4) | ..... | Senseless s.u. |
| H(3) -C(4)                     | 1.555    | 1.555 | .....    | #     | 94 Check       |
| PLAT754_ALERT_4_C Contact Calc | 2.03000, | Rep   | 2.033(7) | ..... | Senseless s.u. |
| H(3) -C(6)                     | 1.555    | 1.555 | .....    | #     | 94 Check       |
| PLAT754_ALERT_4_C Contact Calc | 3.24000, | Rep   | 3.236(7) | ..... | Senseless s.u. |
| H(3) -C(7)                     | 1.555    | 1.555 | .....    | #     | 94 Check       |
| PLAT754_ALERT_4_C Contact Calc | 3.26000, | Rep   | 3.256(5) | ..... | Senseless s.u. |
| H(3) -C(9)                     | 1.555    | 1.555 | .....    | #     | 94 Check       |
| PLAT754_ALERT_4_C Contact Calc | 2.03000, | Rep   | 2.033(5) | ..... | Senseless s.u. |
| H(3) -C(10)                    | 1.555    | 1.555 | .....    | #     | 94 Check       |
| PLAT754_ALERT_4_C Contact Calc | 3.50000, | Rep   | 3.497(5) | ..... | Senseless s.u. |
| H(3) -C(34)                    | 1.555    | 4.565 | .....    | #     | 94 Check       |
| PLAT754_ALERT_4_C Contact Calc | 2.94000, | Rep   | 2.937(6) | ..... | Senseless s.u. |
| H(3) -C(35)                    | 1.555    | 4.565 | .....    | #     | 94 Check       |
| PLAT754_ALERT_4_C Contact Calc | 2.50000, | Rep   | 2.503(5) | ..... | Senseless s.u. |
| H(3) -H(2)                     | 1.555    | 1.555 | .....    | #     | 94 Check       |
| PLAT754_ALERT_4_C Contact Calc | 2.33000, | Rep   | 2.324(6) | ..... | Senseless s.u. |
| H(3) -H(4)                     | 1.555    | 1.555 | .....    | #     | 94 Check       |
| PLAT754_ALERT_4_C Contact Calc | 3.38000, | Rep   | 3.375(5) | ..... | Senseless s.u. |
| H(3) -H(17)                    | 1.555    | 1.565 | .....    | #     | 94 Check       |
| PLAT754_ALERT_4_C Contact Calc | 3.08000, | Rep   | 3.083(5) | ..... | Senseless s.u. |
| H(3) -H(21)                    | 1.555    | 3.766 | .....    | #     | 94 Check       |
| PLAT754_ALERT_4_C Contact Calc | 3.20000, | Rep   | 3.204(4) | ..... | Senseless s.u. |
| H(3) -H(27)                    | 1.555    | 4.565 | .....    | #     | 94 Check       |
| PLAT754_ALERT_4_C Contact Calc | 2.55000, | Rep   | 2.554(6) | ..... | Senseless s.u. |
| H(3) -H(28)                    | 1.555    | 4.565 | .....    | #     | 94 Check       |
| PLAT754_ALERT_4_C Contact Calc | 3.03000, | Rep   | 3.026(7) | ..... | Senseless s.u. |
| H(3) -H(29)                    | 1.555    | 4.565 | .....    | #     | 94 Check       |
| PLAT754_ALERT_4_C Contact Calc | 3.39000, | Rep   | 3.389(6) | ..... | Senseless s.u. |
| H(4) -O(2)                     | 1.555    | 4.565 | .....    | #     | 94 Check       |
| PLAT754_ALERT_4_C Contact Calc | 2.03000, | Rep   | 2.025(5) | ..... | Senseless s.u. |
| H(4) -C(5)                     | 1.555    | 1.555 | .....    | #     | 94 Check       |
| PLAT754_ALERT_4_C Contact Calc | 2.02000, | Rep   | 2.018(6) | ..... | Senseless s.u. |
| H(4) -C(7)                     | 1.555    | 1.555 | .....    | #     | 94 Check       |
| PLAT754_ALERT_4_C Contact Calc | 3.24000, | Rep   | 3.244(5) | ..... | Senseless s.u. |
| H(4) -C(8)                     | 1.555    | 1.555 | .....    | #     | 94 Check       |
| PLAT754_ALERT_4_C Contact Calc | 3.27000, | Rep   | 3.266(5) | ..... | Senseless s.u. |
| H(4) -C(10)                    | 1.555    | 1.555 | .....    | #     | 94 Check       |
| PLAT754_ALERT_4_C Contact Calc | 3.38000, | Rep   | 3.381(6) | ..... | Senseless s.u. |
| H(4) -C(28)                    | 1.555    | 1.555 | .....    | #     | 94 Check       |
| PLAT754_ALERT_4_C Contact Calc | 3.39000, | Rep   | 3.390(5) | ..... | Senseless s.u. |
| H(4) -C(29)                    | 1.555    | 1.555 | .....    | #     | 94 Check       |
| PLAT754_ALERT_4_C Contact Calc | 3.30000, | Rep   | 3.304(6) | ..... | Senseless s.u. |
| H(4) -C(34)                    | 1.555    | 4.565 | .....    | #     | 94 Check       |
| PLAT754_ALERT_4_C Contact Calc | 2.33000, | Rep   | 2.324(6) | ..... | Senseless s.u. |
| H(4) -H(3)                     | 1.555    | 1.555 | .....    | #     | 94 Check       |
| PLAT754_ALERT_4_C Contact Calc | 2.32000, | Rep   | 2.325(7) | ..... | Senseless s.u. |
| H(4) -H(5)                     | 1.555    | 1.555 | .....    | #     | 94 Check       |
| PLAT754_ALERT_4_C Contact Calc | 3.35000, | Rep   | 3.354(5) | ..... | Senseless s.u. |
| H(4) -H(16)                    | 1.555    | 1.565 | .....    | #     | 94 Check       |
| PLAT754_ALERT_4_C Contact Calc | 3.59000, | Rep   | 3.588(5) | ..... | Senseless s.u. |
| H(4) -H(17)                    | 1.555    | 1.565 | .....    | #     | 94 Check       |
| PLAT754_ALERT_4_C Contact Calc | 3.35000, | Rep   | 3.354(4) | ..... | Senseless s.u. |
| H(4) -H(21)                    | 1.555    | 3.766 | .....    | #     | 94 Check       |
| PLAT754_ALERT_4_C Contact Calc | 3.33000, | Rep   | 3.334(6) | ..... | Senseless s.u. |

|                                |          |       |          |       |                |
|--------------------------------|----------|-------|----------|-------|----------------|
| H(4) -H(23)                    | 1.555    | 1.555 | .....    | #     | 94 Check       |
| PLAT754_ALERT_4_C Contact Calc | 3.33000, | Rep   | 3.333(5) | ..... | Senseless s.u. |
| H(4) -H(24)                    | 1.555    | 1.555 | .....    | #     | 94 Check       |
| PLAT754_ALERT_4_C Contact Calc | 3.24000, | Rep   | 3.245(6) | ..... | Senseless s.u. |
| H(4) -H(26)                    | 1.555    | 4.565 | .....    | #     | 94 Check       |
| PLAT754_ALERT_4_C Contact Calc | 2.82000, | Rep   | 2.816(6) | ..... | Senseless s.u. |
| H(4) -H(27)                    | 1.555    | 4.565 | .....    | #     | 94 Check       |
| PLAT754_ALERT_4_C Contact Calc | 3.24000, | Rep   | 3.241(7) | ..... | Senseless s.u. |
| H(5) -C(5)                     | 1.555    | 1.555 | .....    | #     | 94 Check       |
| PLAT754_ALERT_4_C Contact Calc | 2.02000, | Rep   | 2.017(7) | ..... | Senseless s.u. |
| H(5) -C(6)                     | 1.555    | 1.555 | .....    | #     | 94 Check       |
| PLAT754_ALERT_4_C Contact Calc | 2.04000, | Rep   | 2.035(4) | ..... | Senseless s.u. |
| H(5) -C(8)                     | 1.555    | 1.555 | .....    | #     | 94 Check       |
| PLAT754_ALERT_4_C Contact Calc | 3.26000, | Rep   | 3.263(5) | ..... | Senseless s.u. |
| H(5) -C(9)                     | 1.555    | 1.555 | .....    | #     | 94 Check       |
| PLAT754_ALERT_4_C Contact Calc | 3.03000, | Rep   | 3.033(5) | ..... | Senseless s.u. |
| H(5) -C(27)                    | 1.555    | 1.555 | .....    | #     | 94 Check       |
| PLAT754_ALERT_4_C Contact Calc | 3.04000, | Rep   | 3.042(4) | ..... | Senseless s.u. |
| H(5) -C(28)                    | 1.555    | 1.555 | .....    | #     | 94 Check       |
| PLAT754_ALERT_4_C Contact Calc | 3.09000, | Rep   | 3.095(4) | ..... | Senseless s.u. |
| H(5) -C(29)                    | 1.555    | 1.555 | .....    | #     | 94 Check       |
| PLAT754_ALERT_4_C Contact Calc | 3.15000, | Rep   | 3.153(4) | ..... | Senseless s.u. |
| H(5) -C(30)                    | 1.555    | 1.555 | .....    | #     | 94 Check       |
| PLAT754_ALERT_4_C Contact Calc | 3.15000, | Rep   | 3.147(5) | ..... | Senseless s.u. |
| H(5) -C(31)                    | 1.555    | 1.555 | .....    | #     | 94 Check       |
| PLAT754_ALERT_4_C Contact Calc | 3.10000, | Rep   | 3.098(5) | ..... | Senseless s.u. |
| H(5) -C(32)                    | 1.555    | 1.555 | .....    | #     | 94 Check       |
| PLAT754_ALERT_4_C Contact Calc | 3.38000, | Rep   | 3.383(6) | ..... | Senseless s.u. |
| H(5) -C(38)                    | 1.555    | 1.555 | .....    | #     | 94 Check       |
| PLAT754_ALERT_4_C Contact Calc | 2.32000, | Rep   | 2.325(7) | ..... | Senseless s.u. |
| H(5) -H(4)                     | 1.555    | 1.555 | .....    | #     | 94 Check       |
| PLAT754_ALERT_4_C Contact Calc | 2.35000, | Rep   | 2.350(4) | ..... | Senseless s.u. |
| H(5) -H(6)                     | 1.555    | 1.555 | .....    | #     | 94 Check       |
| PLAT754_ALERT_4_C Contact Calc | 3.53000, | Rep   | 3.529(5) | ..... | Senseless s.u. |
| H(5) -H(22)                    | 1.555    | 1.555 | .....    | #     | 94 Check       |
| PLAT754_ALERT_4_C Contact Calc | 3.46000, | Rep   | 3.454(4) | ..... | Senseless s.u. |
| H(5) -H(22)                    | 1.555    | 3.766 | .....    | #     | 94 Check       |
| PLAT754_ALERT_4_C Contact Calc | 3.55000, | Rep   | 3.555(5) | ..... | Senseless s.u. |
| H(5) -H(23)                    | 1.555    | 1.555 | .....    | #     | 94 Check       |
| PLAT754_ALERT_4_C Contact Calc | 3.06000, | Rep   | 3.058(4) | ..... | Senseless s.u. |
| H(5) -H(31)                    | 1.555    | 1.555 | .....    | #     | 94 Check       |
| PLAT754_ALERT_4_C Contact Calc | 2.69000, | Rep   | 2.690(4) | ..... | Senseless s.u. |
| H(6) -C(1)                     | 1.555    | 1.555 | .....    | #     | 94 Check       |
| PLAT754_ALERT_4_C Contact Calc | 3.24000, | Rep   | 3.243(6) | ..... | Senseless s.u. |
| H(6) -C(6)                     | 1.555    | 1.555 | .....    | #     | 94 Check       |
| PLAT754_ALERT_4_C Contact Calc | 2.05000, | Rep   | 2.047(5) | ..... | Senseless s.u. |
| H(6) -C(7)                     | 1.555    | 1.555 | .....    | #     | 94 Check       |
| PLAT754_ALERT_4_C Contact Calc | 2.02000, | Rep   | 2.016(6) | ..... | Senseless s.u. |
| H(6) -C(9)                     | 1.555    | 1.555 | .....    | #     | 94 Check       |
| PLAT754_ALERT_4_C Contact Calc | 3.25000, | Rep   | 3.252(6) | ..... | Senseless s.u. |
| H(6) -C(10)                    | 1.555    | 1.555 | .....    | #     | 94 Check       |
| PLAT754_ALERT_4_C Contact Calc | 3.34000, | Rep   | 3.340(5) | ..... | Senseless s.u. |
| H(6) -C(11)                    | 1.555    | 1.555 | .....    | #     | 94 Check       |
| PLAT754_ALERT_4_C Contact Calc | 2.76000, | Rep   | 2.755(4) | ..... | Senseless s.u. |
| H(6) -C(14)                    | 1.555    | 1.555 | .....    | #     | 94 Check       |
| PLAT754_ALERT_4_C Contact Calc | 3.36000, | Rep   | 3.364(4) | ..... | Senseless s.u. |
| H(6) -C(15)                    | 1.555    | 1.555 | .....    | #     | 94 Check       |
| PLAT754_ALERT_4_C Contact Calc | 3.09000, | Rep   | 3.091(4) | ..... | Senseless s.u. |
| H(6) -C(37)                    | 1.555    | 1.555 | .....    | #     | 94 Check       |
| PLAT754_ALERT_4_C Contact Calc | 2.82000, | Rep   | 2.823(5) | ..... | Senseless s.u. |
| H(6) -C(38)                    | 1.555    | 1.555 | .....    | #     | 94 Check       |
| PLAT754_ALERT_4_C Contact Calc | 2.89000, | Rep   | 2.891(6) | ..... | Senseless s.u. |

|                                |          |       |          |       |                |
|--------------------------------|----------|-------|----------|-------|----------------|
| H(6) -C(39)                    | 1.555    | 1.555 | .....    | #     | 94 Check       |
| PLAT754_ALERT_4_C Contact Calc | 3.07000, | Rep   | 3.069(6) | ..... | Senseless s.u. |
| H(6) -C(40)                    | 1.555    | 1.555 | .....    | #     | 94 Check       |
| PLAT754_ALERT_4_C Contact Calc | 2.35000, | Rep   | 2.350(4) | ..... | Senseless s.u. |
| H(6) -H(5)                     | 1.555    | 1.555 | .....    | #     | 94 Check       |
| PLAT754_ALERT_4_C Contact Calc | 2.22000, | Rep   | 2.219(4) | ..... | Senseless s.u. |
| H(6) -H(11)                    | 1.555    | 1.555 | .....    | #     | 94 Check       |
| PLAT754_ALERT_4_C Contact Calc | 3.02000, | Rep   | 3.019(4) | ..... | Senseless s.u. |
| H(6) -H(13)                    | 1.555    | 1.555 | .....    | #     | 94 Check       |
| PLAT754_ALERT_4_C Contact Calc | 3.13000, | Rep   | 3.131(4) | ..... | Senseless s.u. |
| H(6) -H(22)                    | 1.555    | 3.766 | .....    | #     | 94 Check       |
| PLAT754_ALERT_4_C Contact Calc | 2.66000, | Rep   | 2.657(4) | ..... | Senseless s.u. |
| H(6) -H(31)                    | 1.555    | 1.555 | .....    | #     | 94 Check       |
| PLAT754_ALERT_4_C Contact Calc | 3.34000, | Rep   | 3.343(4) | ..... | Senseless s.u. |
| H(6) -H(32)                    | 1.555    | 1.555 | .....    | #     | 94 Check       |
| PLAT754_ALERT_4_C Contact Calc | 1.95000, | Rep   | 1.953(5) | ..... | Senseless s.u. |
| H(7) -O(1)                     | 1.555    | 1.555 | .....    | #     | 94 Check       |
| PLAT754_ALERT_4_C Contact Calc | 3.05000, | Rep   | 3.049(4) | ..... | Senseless s.u. |
| H(7) -O(2)                     | 1.555    | 2.645 | .....    | #     | 94 Check       |
| PLAT754_ALERT_4_C Contact Calc | 3.04000, | Rep   | 3.044(4) | ..... | Senseless s.u. |
| H(7) -N(1)                     | 1.555    | 1.555 | .....    | #     | 94 Check       |
| PLAT754_ALERT_4_C Contact Calc | 2.68000, | Rep   | 2.682(4) | ..... | Senseless s.u. |
| H(7) -C(1)                     | 1.555    | 1.555 | .....    | #     | 94 Check       |
| PLAT754_ALERT_4_C Contact Calc | 2.04000, | Rep   | 2.044(4) | ..... | Senseless s.u. |
| H(7) -C(2)                     | 1.555    | 1.555 | .....    | #     | 94 Check       |
| PLAT754_ALERT_4_C Contact Calc | 2.67000, | Rep   | 2.671(5) | ..... | Senseless s.u. |
| H(7) -C(3)                     | 1.555    | 1.555 | .....    | #     | 94 Check       |
| PLAT754_ALERT_4_C Contact Calc | 2.56000, | Rep   | 2.560(4) | ..... | Senseless s.u. |
| H(7) -C(11)                    | 1.555    | 1.555 | .....    | #     | 94 Check       |
| PLAT754_ALERT_4_C Contact Calc | 2.68000, | Rep   | 2.684(6) | ..... | Senseless s.u. |
| H(7) -C(13)                    | 1.555    | 1.555 | .....    | #     | 94 Check       |
| PLAT754_ALERT_4_C Contact Calc | 3.21000, | Rep   | 3.214(5) | ..... | Senseless s.u. |
| H(7) -C(14)                    | 1.555    | 1.555 | .....    | #     | 94 Check       |
| PLAT754_ALERT_4_C Contact Calc | 3.38000, | Rep   | 3.375(4) | ..... | Senseless s.u. |
| H(7) -C(16)                    | 1.555    | 1.555 | .....    | #     | 94 Check       |
| PLAT754_ALERT_4_C Contact Calc | 3.23000, | Rep   | 3.233(4) | ..... | Senseless s.u. |
| H(7) -C(35)                    | 1.555    | 2.645 | .....    | #     | 94 Check       |
| PLAT754_ALERT_4_C Contact Calc | 2.76000, | Rep   | 2.759(6) | ..... | Senseless s.u. |
| H(7) -H(1)                     | 1.555    | 1.555 | .....    | #     | 94 Check       |
| PLAT754_ALERT_4_C Contact Calc | 1.55000, | Rep   | 1.551(4) | ..... | Senseless s.u. |
| H(7) -H(8)                     | 1.555    | 1.555 | .....    | #     | 94 Check       |
| PLAT754_ALERT_4_C Contact Calc | 3.54000, | Rep   | 3.540(6) | ..... | Senseless s.u. |
| H(7) -H(9)                     | 1.555    | 1.555 | .....    | #     | 94 Check       |
| PLAT754_ALERT_4_C Contact Calc | 2.61000, | Rep   | 2.607(6) | ..... | Senseless s.u. |
| H(7) -H(10)                    | 1.555    | 1.555 | .....    | #     | 94 Check       |
| PLAT754_ALERT_4_C Contact Calc | 3.44000, | Rep   | 3.444(7) | ..... | Senseless s.u. |
| H(7) -H(16)                    | 1.555    | 3.656 | .....    | #     | 94 Check       |
| PLAT754_ALERT_4_C Contact Calc | 2.59000, | Rep   | 2.585(4) | ..... | Senseless s.u. |
| H(7) -H(29)                    | 1.555    | 2.645 | .....    | #     | 94 Check       |
| PLAT754_ALERT_4_C Contact Calc | 3.07000, | Rep   | 3.073(5) | ..... | Senseless s.u. |
| H(7) -H(32)                    | 1.555    | 2.645 | .....    | #     | 94 Check       |
| PLAT754_ALERT_4_C Contact Calc | 1.94000, | Rep   | 1.942(6) | ..... | Senseless s.u. |
| H(8) -O(1)                     | 1.555    | 1.555 | .....    | #     | 94 Check       |
| PLAT754_ALERT_4_C Contact Calc | 3.32000, | Rep   | 3.321(4) | ..... | Senseless s.u. |
| H(8) -C(1)                     | 1.555    | 1.555 | .....    | #     | 94 Check       |
| PLAT754_ALERT_4_C Contact Calc | 2.03000, | Rep   | 2.034(4) | ..... | Senseless s.u. |
| H(8) -C(2)                     | 1.555    | 1.555 | .....    | #     | 94 Check       |
| PLAT754_ALERT_4_C Contact Calc | 2.64000, | Rep   | 2.641(5) | ..... | Senseless s.u. |
| H(8) -C(3)                     | 1.555    | 1.555 | .....    | #     | 94 Check       |
| PLAT754_ALERT_4_C Contact Calc | 3.18000, | Rep   | 3.179(6) | ..... | Senseless s.u. |
| H(8) -C(13)                    | 1.555    | 1.555 | .....    | #     | 94 Check       |
| PLAT754_ALERT_4_C Contact Calc | 2.80000, | Rep   | 2.799(4) | ..... | Senseless s.u. |

|                                |          |       |          |       |                |
|--------------------------------|----------|-------|----------|-------|----------------|
| H(8) -C(16)                    | 1.555    | 1.555 | .....    | #     | 94 Check       |
| PLAT754_ALERT_4_C Contact Calc | 2.82000, | Rep   | 2.824(4) | ..... | Senseless s.u. |
| H(8) -C(17)                    | 1.555    | 1.555 | .....    | #     | 94 Check       |
| PLAT754_ALERT_4_C Contact Calc | 3.57000, | Rep   | 3.574(7) | ..... | Senseless s.u. |
| H(8) -C(19)                    | 1.555    | 3.656 | .....    | #     | 94 Check       |
| PLAT754_ALERT_4_C Contact Calc | 2.81000, | Rep   | 2.808(5) | ..... | Senseless s.u. |
| H(8) -C(22)                    | 1.555    | 1.555 | .....    | #     | 94 Check       |
| PLAT754_ALERT_4_C Contact Calc | 3.53000, | Rep   | 3.526(5) | ..... | Senseless s.u. |
| H(8) -C(43)                    | 1.555    | 2.645 | .....    | #     | 94 Check       |
| PLAT754_ALERT_4_C Contact Calc | 3.27000, | Rep   | 3.271(4) | ..... | Senseless s.u. |
| H(8) -C(44)                    | 1.555    | 2.645 | .....    | #     | 94 Check       |
| PLAT754_ALERT_4_C Contact Calc | 2.48000, | Rep   | 2.479(6) | ..... | Senseless s.u. |
| H(8) -H(1)                     | 1.555    | 1.555 | .....    | #     | 94 Check       |
| PLAT754_ALERT_4_C Contact Calc | 1.55000, | Rep   | 1.551(4) | ..... | Senseless s.u. |
| H(8) -H(7)                     | 1.555    | 1.555 | .....    | #     | 94 Check       |
| PLAT754_ALERT_4_C Contact Calc | 3.52000, | Rep   | 3.521(6) | ..... | Senseless s.u. |
| H(8) -H(10)                    | 1.555    | 1.555 | .....    | #     | 94 Check       |
| PLAT754_ALERT_4_C Contact Calc | 3.57000, | Rep   | 3.572(4) | ..... | Senseless s.u. |
| H(8) -H(14)                    | 1.555    | 1.555 | .....    | #     | 94 Check       |
| PLAT754_ALERT_4_C Contact Calc | 3.29000, | Rep   | 3.291(6) | ..... | Senseless s.u. |
| H(8) -H(16)                    | 1.555    | 3.656 | .....    | #     | 94 Check       |
| PLAT754_ALERT_4_C Contact Calc | 2.64000, | Rep   | 2.641(5) | ..... | Senseless s.u. |
| H(8) -H(19)                    | 1.555    | 1.555 | .....    | #     | 94 Check       |
| PLAT754_ALERT_4_C Contact Calc | 1.95000, | Rep   | 1.954(5) | ..... | Senseless s.u. |
| H(9) -O(1)                     | 1.555    | 1.555 | .....    | #     | 94 Check       |
| PLAT754_ALERT_4_C Contact Calc | 2.98000, | Rep   | 2.982(5) | ..... | Senseless s.u. |
| H(9) -N(1)                     | 1.555    | 2.645 | .....    | #     | 94 Check       |
| PLAT754_ALERT_4_C Contact Calc | 3.32000, | Rep   | 3.323(5) | ..... | Senseless s.u. |
| H(9) -C(1)                     | 1.555    | 1.555 | .....    | #     | 94 Check       |
| PLAT754_ALERT_4_C Contact Calc | 3.19000, | Rep   | 3.189(6) | ..... | Senseless s.u. |
| H(9) -C(12)                    | 1.555    | 1.555 | .....    | #     | 94 Check       |
| PLAT754_ALERT_4_C Contact Calc | 2.05000, | Rep   | 2.048(4) | ..... | Senseless s.u. |
| H(9) -C(14)                    | 1.555    | 1.555 | .....    | #     | 94 Check       |
| PLAT754_ALERT_4_C Contact Calc | 2.76000, | Rep   | 2.756(4) | ..... | Senseless s.u. |
| H(9) -C(15)                    | 1.555    | 1.555 | .....    | #     | 94 Check       |
| PLAT754_ALERT_4_C Contact Calc | 3.53000, | Rep   | 3.528(5) | ..... | Senseless s.u. |
| H(9) -C(21)                    | 1.555    | 2.655 | .....    | #     | 94 Check       |
| PLAT754_ALERT_4_C Contact Calc | 3.57000, | Rep   | 3.570(6) | ..... | Senseless s.u. |
| H(9) -C(43)                    | 1.555    | 1.555 | .....    | #     | 94 Check       |
| PLAT754_ALERT_4_C Contact Calc | 3.54000, | Rep   | 3.540(6) | ..... | Senseless s.u. |
| H(9) -H(7)                     | 1.555    | 1.555 | .....    | #     | 94 Check       |
| PLAT754_ALERT_4_C Contact Calc | 1.55000, | Rep   | 1.551(5) | ..... | Senseless s.u. |
| H(9) -H(10)                    | 1.555    | 1.555 | .....    | #     | 94 Check       |
| PLAT754_ALERT_4_C Contact Calc | 2.33000, | Rep   | 2.331(4) | ..... | Senseless s.u. |
| H(9) -H(11)                    | 1.555    | 1.555 | .....    | #     | 94 Check       |
| PLAT754_ALERT_4_C Contact Calc | 2.48000, | Rep   | 2.476(4) | ..... | Senseless s.u. |
| H(9) -H(12)                    | 1.555    | 1.555 | .....    | #     | 94 Check       |
| PLAT754_ALERT_4_C Contact Calc | 3.42000, | Rep   | 3.423(4) | ..... | Senseless s.u. |
| H(9) -H(13)                    | 1.555    | 1.555 | .....    | #     | 94 Check       |
| PLAT754_ALERT_4_C Contact Calc | 2.68000, | Rep   | 2.680(5) | ..... | Senseless s.u. |
| H(9) -H(18)                    | 1.555    | 2.655 | .....    | #     | 94 Check       |
| PLAT754_ALERT_4_C Contact Calc | 3.53000, | Rep   | 3.525(5) | ..... | Senseless s.u. |
| H(9) -H(19)                    | 1.555    | 1.555 | .....    | #     | 94 Check       |
| PLAT754_ALERT_4_C Contact Calc | 3.57000, | Rep   | 3.572(4) | ..... | Senseless s.u. |
| H(9) -H(19)                    | 1.555    | 2.655 | .....    | #     | 94 Check       |
| PLAT754_ALERT_4_C Contact Calc | 3.60000, | Rep   | 3.598(5) | ..... | Senseless s.u. |
| H(9) -H(32)                    | 1.555    | 2.645 | .....    | #     | 94 Check       |
| PLAT754_ALERT_4_C Contact Calc | 1.95000, | Rep   | 1.949(4) | ..... | Senseless s.u. |
| H(10)-O(1)                     | 1.555    | 1.555 | .....    | #     | 94 Check       |
| PLAT754_ALERT_4_C Contact Calc | 2.90000, | Rep   | 2.903(5) | ..... | Senseless s.u. |
| H(10)-N(1)                     | 1.555    | 1.555 | .....    | #     | 94 Check       |
| PLAT754_ALERT_4_C Contact Calc | 2.64000, | Rep   | 2.643(4) | ..... | Senseless s.u. |

|                                |          |       |          |       |                |
|--------------------------------|----------|-------|----------|-------|----------------|
| H(10)-C(1)                     | 1.555    | 1.555 | .....    | #     | 94 Check       |
| PLAT754_ALERT_4_C Contact Calc | 3.21000, | Rep   | 3.207(5) | ..... | Senseless s.u. |
| H(10)-C(2)                     | 1.555    | 1.555 | .....    | #     | 94 Check       |
| PLAT754_ALERT_4_C Contact Calc | 2.46000, | Rep   | 2.461(5) | ..... | Senseless s.u. |
| H(10)-C(11)                    | 1.555    | 1.555 | .....    | #     | 94 Check       |
| PLAT754_ALERT_4_C Contact Calc | 2.66000, | Rep   | 2.661(6) | ..... | Senseless s.u. |
| H(10)-C(12)                    | 1.555    | 1.555 | .....    | #     | 94 Check       |
| PLAT754_ALERT_4_C Contact Calc | 2.04000, | Rep   | 2.043(4) | ..... | Senseless s.u. |
| H(10)-C(14)                    | 1.555    | 1.555 | .....    | #     | 94 Check       |
| PLAT754_ALERT_4_C Contact Calc | 3.32000, | Rep   | 3.315(4) | ..... | Senseless s.u. |
| H(10)-C(15)                    | 1.555    | 1.555 | .....    | #     | 94 Check       |
| PLAT754_ALERT_4_C Contact Calc | 3.58000, | Rep   | 3.586(5) | ..... | Senseless s.u. |
| H(10)-C(22)                    | 1.555    | 2.655 | .....    | #     | 94 Check       |
| PLAT754_ALERT_4_C Contact Calc | 2.61000, | Rep   | 2.607(6) | ..... | Senseless s.u. |
| H(10)-H(7)                     | 1.555    | 1.555 | .....    | #     | 94 Check       |
| PLAT754_ALERT_4_C Contact Calc | 3.52000, | Rep   | 3.521(6) | ..... | Senseless s.u. |
| H(10)-H(8)                     | 1.555    | 1.555 | .....    | #     | 94 Check       |
| PLAT754_ALERT_4_C Contact Calc | 1.55000, | Rep   | 1.551(5) | ..... | Senseless s.u. |
| H(10)-H(9)                     | 1.555    | 1.555 | .....    | #     | 94 Check       |
| PLAT754_ALERT_4_C Contact Calc | 2.39000, | Rep   | 2.393(4) | ..... | Senseless s.u. |
| H(10)-H(11)                    | 1.555    | 1.555 | .....    | #     | 94 Check       |
| PLAT754_ALERT_4_C Contact Calc | 3.42000, | Rep   | 3.417(4) | ..... | Senseless s.u. |
| H(10)-H(12)                    | 1.555    | 1.555 | .....    | #     | 94 Check       |
| PLAT754_ALERT_4_C Contact Calc | 3.01000, | Rep   | 3.014(6) | ..... | Senseless s.u. |
| H(10)-H(18)                    | 1.555    | 2.655 | .....    | #     | 94 Check       |
| PLAT754_ALERT_4_C Contact Calc | 2.92000, | Rep   | 2.919(5) | ..... | Senseless s.u. |
| H(10)-H(19)                    | 1.555    | 2.655 | .....    | #     | 94 Check       |
| PLAT754_ALERT_4_C Contact Calc | 3.03000, | Rep   | 3.027(6) | ..... | Senseless s.u. |
| H(10)-H(29)                    | 1.555    | 2.645 | .....    | #     | 94 Check       |
| PLAT754_ALERT_4_C Contact Calc | 3.04000, | Rep   | 3.037(4) | ..... | Senseless s.u. |
| H(10)-H(32)                    | 1.555    | 2.645 | .....    | #     | 94 Check       |
| PLAT754_ALERT_4_C Contact Calc | 3.26000, | Rep   | 3.257(4) | ..... | Senseless s.u. |
| H(11)-O(1)                     | 1.555    | 1.555 | .....    | #     | 94 Check       |
| PLAT754_ALERT_4_C Contact Calc | 2.08000, | Rep   | 2.083(5) | ..... | Senseless s.u. |
| H(11)-C(1)                     | 1.555    | 1.555 | .....    | #     | 94 Check       |
| PLAT754_ALERT_4_C Contact Calc | 3.21000, | Rep   | 3.213(5) | ..... | Senseless s.u. |
| H(11)-C(2)                     | 1.555    | 1.555 | .....    | #     | 94 Check       |
| PLAT754_ALERT_4_C Contact Calc | 2.81000, | Rep   | 2.808(4) | ..... | Senseless s.u. |
| H(11)-C(8)                     | 1.555    | 1.555 | .....    | #     | 94 Check       |
| PLAT754_ALERT_4_C Contact Calc | 2.79000, | Rep   | 2.793(5) | ..... | Senseless s.u. |
| H(11)-C(9)                     | 1.555    | 1.555 | .....    | #     | 94 Check       |
| PLAT754_ALERT_4_C Contact Calc | 2.80000, | Rep   | 2.796(5) | ..... | Senseless s.u. |
| H(11)-C(11)                    | 1.555    | 1.555 | .....    | #     | 94 Check       |
| PLAT754_ALERT_4_C Contact Calc | 2.07000, | Rep   | 2.071(4) | ..... | Senseless s.u. |
| H(11)-C(13)                    | 1.555    | 1.555 | .....    | #     | 94 Check       |
| PLAT754_ALERT_4_C Contact Calc | 2.10000, | Rep   | 2.097(4) | ..... | Senseless s.u. |
| H(11)-C(15)                    | 1.555    | 1.555 | .....    | #     | 94 Check       |
| PLAT754_ALERT_4_C Contact Calc | 3.23000, | Rep   | 3.233(5) | ..... | Senseless s.u. |
| H(11)-C(16)                    | 1.555    | 1.555 | .....    | #     | 94 Check       |
| PLAT754_ALERT_4_C Contact Calc | 3.15000, | Rep   | 3.154(5) | ..... | Senseless s.u. |
| H(11)-C(39)                    | 1.555    | 1.555 | .....    | #     | 94 Check       |
| PLAT754_ALERT_4_C Contact Calc | 3.24000, | Rep   | 3.239(6) | ..... | Senseless s.u. |
| H(11)-C(40)                    | 1.555    | 1.555 | .....    | #     | 94 Check       |
| PLAT754_ALERT_4_C Contact Calc | 3.34000, | Rep   | 3.338(7) | ..... | Senseless s.u. |
| H(11)-C(41)                    | 1.555    | 1.555 | .....    | #     | 94 Check       |
| PLAT754_ALERT_4_C Contact Calc | 3.34000, | Rep   | 3.343(7) | ..... | Senseless s.u. |
| H(11)-C(42)                    | 1.555    | 1.555 | .....    | #     | 94 Check       |
| PLAT754_ALERT_4_C Contact Calc | 3.23000, | Rep   | 3.234(6) | ..... | Senseless s.u. |
| H(11)-C(43)                    | 1.555    | 1.555 | .....    | #     | 94 Check       |
| PLAT754_ALERT_4_C Contact Calc | 3.13000, | Rep   | 3.129(6) | ..... | Senseless s.u. |
| H(11)-C(44)                    | 1.555    | 1.555 | .....    | #     | 94 Check       |
| PLAT754_ALERT_4_C Contact Calc | 2.22000, | Rep   | 2.219(4) | ..... | Senseless s.u. |

|                                |          |       |          |       |                |
|--------------------------------|----------|-------|----------|-------|----------------|
| H(11)-H(6)                     | 1.555    | 1.555 | .....    | #     | 94 Check       |
| PLAT754_ALERT_4_C Contact Calc | 2.33000, | Rep   | 2.331(4) | ..... | Senseless s.u. |
| H(11)-H(9)                     | 1.555    | 1.555 | .....    | #     | 94 Check       |
| PLAT754_ALERT_4_C Contact Calc | 2.39000, | Rep   | 2.393(4) | ..... | Senseless s.u. |
| H(11)-H(10)                    | 1.555    | 1.555 | .....    | #     | 94 Check       |
| PLAT754_ALERT_4_C Contact Calc | 2.60000, | Rep   | 2.600(4) | ..... | Senseless s.u. |
| H(11)-H(12)                    | 1.555    | 1.555 | .....    | #     | 94 Check       |
| PLAT754_ALERT_4_C Contact Calc | 2.27000, | Rep   | 2.269(4) | ..... | Senseless s.u. |
| H(11)-H(13)                    | 1.555    | 1.555 | .....    | #     | 94 Check       |
| PLAT754_ALERT_4_C Contact Calc | 3.55000, | Rep   | 3.546(5) | ..... | Senseless s.u. |
| H(11)-H(14)                    | 1.555    | 1.555 | .....    | #     | 94 Check       |
| PLAT754_ALERT_4_C Contact Calc | 2.64000, | Rep   | 2.639(4) | ..... | Senseless s.u. |
| H(12)-O(1)                     | 1.555    | 1.555 | .....    | #     | 94 Check       |
| PLAT754_ALERT_4_C Contact Calc | 3.18000, | Rep   | 3.183(4) | ..... | Senseless s.u. |
| H(12)-C(1)                     | 1.555    | 1.555 | .....    | #     | 94 Check       |
| PLAT754_ALERT_4_C Contact Calc | 3.02000, | Rep   | 3.022(5) | ..... | Senseless s.u. |
| H(12)-C(2)                     | 1.555    | 1.555 | .....    | #     | 94 Check       |
| PLAT754_ALERT_4_C Contact Calc | 3.29000, | Rep   | 3.291(5) | ..... | Senseless s.u. |
| H(12)-C(12)                    | 1.555    | 1.555 | .....    | #     | 94 Check       |
| PLAT754_ALERT_4_C Contact Calc | 2.49000, | Rep   | 2.490(4) | ..... | Senseless s.u. |
| H(12)-C(13)                    | 1.555    | 1.555 | .....    | #     | 94 Check       |
| PLAT754_ALERT_4_C Contact Calc | 2.08000, | Rep   | 2.076(4) | ..... | Senseless s.u. |
| H(12)-C(14)                    | 1.555    | 1.555 | .....    | #     | 94 Check       |
| PLAT754_ALERT_4_C Contact Calc | 2.07000, | Rep   | 2.074(5) | ..... | Senseless s.u. |
| H(12)-C(16)                    | 1.555    | 1.555 | .....    | #     | 94 Check       |
| PLAT754_ALERT_4_C Contact Calc | 2.64000, | Rep   | 2.642(5) | ..... | Senseless s.u. |
| H(12)-C(17)                    | 1.555    | 1.555 | .....    | #     | 94 Check       |
| PLAT754_ALERT_4_C Contact Calc | 2.74000, | Rep   | 2.740(5) | ..... | Senseless s.u. |
| H(12)-C(22)                    | 1.555    | 1.555 | .....    | #     | 94 Check       |
| PLAT754_ALERT_4_C Contact Calc | 3.50000, | Rep   | 3.499(4) | ..... | Senseless s.u. |
| H(12)-C(36)                    | 1.555    | 1.545 | .....    | #     | 94 Check       |
| PLAT754_ALERT_4_C Contact Calc | 2.48000, | Rep   | 2.476(4) | ..... | Senseless s.u. |
| H(12)-H(9)                     | 1.555    | 1.555 | .....    | #     | 94 Check       |
| PLAT754_ALERT_4_C Contact Calc | 3.42000, | Rep   | 3.417(4) | ..... | Senseless s.u. |
| H(12)-H(10)                    | 1.555    | 1.555 | .....    | #     | 94 Check       |
| PLAT754_ALERT_4_C Contact Calc | 2.60000, | Rep   | 2.600(4) | ..... | Senseless s.u. |
| H(12)-H(11)                    | 1.555    | 1.555 | .....    | #     | 94 Check       |
| PLAT754_ALERT_4_C Contact Calc | 1.55000, | Rep   | 1.551(4) | ..... | Senseless s.u. |
| H(12)-H(13)                    | 1.555    | 1.555 | .....    | #     | 94 Check       |
| PLAT754_ALERT_4_C Contact Calc | 2.72000, | Rep   | 2.722(5) | ..... | Senseless s.u. |
| H(12)-H(14)                    | 1.555    | 1.555 | .....    | #     | 94 Check       |
| PLAT754_ALERT_4_C Contact Calc | 2.34000, | Rep   | 2.341(5) | ..... | Senseless s.u. |
| H(12)-H(19)                    | 1.555    | 1.555 | .....    | #     | 94 Check       |
| PLAT754_ALERT_4_C Contact Calc | 3.37000, | Rep   | 3.374(4) | ..... | Senseless s.u. |
| H(12)-H(25)                    | 1.555    | 1.545 | .....    | #     | 94 Check       |
| PLAT754_ALERT_4_C Contact Calc | 2.63000, | Rep   | 2.631(4) | ..... | Senseless s.u. |
| H(12)-H(30)                    | 1.555    | 1.545 | .....    | #     | 94 Check       |
| PLAT754_ALERT_4_C Contact Calc | 2.88000, | Rep   | 2.884(4) | ..... | Senseless s.u. |
| H(13)-C(1)                     | 1.555    | 1.555 | .....    | #     | 94 Check       |
| PLAT754_ALERT_4_C Contact Calc | 3.15000, | Rep   | 3.150(5) | ..... | Senseless s.u. |
| H(13)-C(2)                     | 1.555    | 1.555 | .....    | #     | 94 Check       |
| PLAT754_ALERT_4_C Contact Calc | 3.25000, | Rep   | 3.253(4) | ..... | Senseless s.u. |
| H(13)-C(8)                     | 1.555    | 1.555 | .....    | #     | 94 Check       |
| PLAT754_ALERT_4_C Contact Calc | 3.13000, | Rep   | 3.128(5) | ..... | Senseless s.u. |
| H(13)-C(9)                     | 1.555    | 1.555 | .....    | #     | 94 Check       |
| PLAT754_ALERT_4_C Contact Calc | 3.27000, | Rep   | 3.270(4) | ..... | Senseless s.u. |
| H(13)-C(13)                    | 1.555    | 1.555 | .....    | #     | 94 Check       |
| PLAT754_ALERT_4_C Contact Calc | 2.08000, | Rep   | 2.081(4) | ..... | Senseless s.u. |
| H(13)-C(14)                    | 1.555    | 1.555 | .....    | #     | 94 Check       |
| PLAT754_ALERT_4_C Contact Calc | 2.08000, | Rep   | 2.084(5) | ..... | Senseless s.u. |
| H(13)-C(16)                    | 1.555    | 1.555 | .....    | #     | 94 Check       |
| PLAT754_ALERT_4_C Contact Calc | 3.13000, | Rep   | 3.128(5) | ..... | Senseless s.u. |

|                                |          |       |          |       |                |
|--------------------------------|----------|-------|----------|-------|----------------|
| H(13)-C(17)                    | 1.555    | 1.555 | .....    | #     | 94 Check       |
| PLAT754_ALERT_4_C Contact Calc | 3.06000, | Rep   | 3.063(4) | ..... | Senseless s.u. |
| H(13)-C(27)                    | 1.555    | 3.766 | .....    | #     | 94 Check       |
| PLAT754_ALERT_4_C Contact Calc | 3.22000, | Rep   | 3.224(4) | ..... | Senseless s.u. |
| H(13)-C(28)                    | 1.555    | 3.766 | .....    | #     | 94 Check       |
| PLAT754_ALERT_4_C Contact Calc | 3.49000, | Rep   | 3.493(7) | ..... | Senseless s.u. |
| H(13)-C(41)                    | 1.555    | 1.555 | .....    | #     | 94 Check       |
| PLAT754_ALERT_4_C Contact Calc | 3.02000, | Rep   | 3.019(4) | ..... | Senseless s.u. |
| H(13)-H(6)                     | 1.555    | 1.555 | .....    | #     | 94 Check       |
| PLAT754_ALERT_4_C Contact Calc | 3.42000, | Rep   | 3.423(4) | ..... | Senseless s.u. |
| H(13)-H(9)                     | 1.555    | 1.555 | .....    | #     | 94 Check       |
| PLAT754_ALERT_4_C Contact Calc | 2.27000, | Rep   | 2.269(4) | ..... | Senseless s.u. |
| H(13)-H(11)                    | 1.555    | 1.555 | .....    | #     | 94 Check       |
| PLAT754_ALERT_4_C Contact Calc | 1.55000, | Rep   | 1.551(4) | ..... | Senseless s.u. |
| H(13)-H(12)                    | 1.555    | 1.555 | .....    | #     | 94 Check       |
| PLAT754_ALERT_4_C Contact Calc | 2.17000, | Rep   | 2.168(6) | ..... | Senseless s.u. |
| H(13)-H(14)                    | 1.555    | 1.555 | .....    | #     | 94 Check       |
| PLAT754_ALERT_4_C Contact Calc | 2.47000, | Rep   | 2.467(4) | ..... | Senseless s.u. |
| H(13)-H(22)                    | 1.555    | 3.766 | .....    | #     | 94 Check       |
| PLAT754_ALERT_4_C Contact Calc | 2.80000, | Rep   | 2.798(5) | ..... | Senseless s.u. |
| H(13)-H(23)                    | 1.555    | 3.766 | .....    | #     | 94 Check       |
| PLAT754_ALERT_4_C Contact Calc | 3.40000, | Rep   | 3.404(4) | ..... | Senseless s.u. |
| H(13)-H(25)                    | 1.555    | 1.545 | .....    | #     | 94 Check       |
| PLAT754_ALERT_4_C Contact Calc | 3.44000, | Rep   | 3.444(4) | ..... | Senseless s.u. |
| H(13)-H(30)                    | 1.555    | 1.545 | .....    | #     | 94 Check       |
| PLAT754_ALERT_4_C Contact Calc | 2.61000, | Rep   | 2.612(3) | ..... | Senseless s.u. |
| H(14)-C(1)                     | 1.555    | 1.555 | .....    | #     | 94 Check       |
| PLAT754_ALERT_4_C Contact Calc | 2.04000, | Rep   | 2.041(4) | ..... | Senseless s.u. |
| H(14)-C(2)                     | 1.555    | 1.555 | .....    | #     | 94 Check       |
| PLAT754_ALERT_4_C Contact Calc | 2.58000, | Rep   | 2.586(5) | ..... | Senseless s.u. |
| H(14)-C(3)                     | 1.555    | 1.555 | .....    | #     | 94 Check       |
| PLAT754_ALERT_4_C Contact Calc | 2.94000, | Rep   | 2.940(5) | ..... | Senseless s.u. |
| H(14)-C(4)                     | 1.555    | 1.555 | .....    | #     | 94 Check       |
| PLAT754_ALERT_4_C Contact Calc | 3.45000, | Rep   | 3.451(4) | ..... | Senseless s.u. |
| H(14)-C(8)                     | 1.555    | 1.555 | .....    | #     | 94 Check       |
| PLAT754_ALERT_4_C Contact Calc | 2.62000, | Rep   | 2.620(3) | ..... | Senseless s.u. |
| H(14)-C(9)                     | 1.555    | 1.555 | .....    | #     | 94 Check       |
| PLAT754_ALERT_4_C Contact Calc | 2.87000, | Rep   | 2.872(4) | ..... | Senseless s.u. |
| H(14)-C(10)                    | 1.555    | 1.555 | .....    | #     | 94 Check       |
| PLAT754_ALERT_4_C Contact Calc | 3.34000, | Rep   | 3.343(4) | ..... | Senseless s.u. |
| H(14)-C(12)                    | 1.555    | 1.555 | .....    | #     | 94 Check       |
| PLAT754_ALERT_4_C Contact Calc | 2.93000, | Rep   | 2.932(4) | ..... | Senseless s.u. |
| H(14)-C(14)                    | 1.555    | 1.555 | .....    | #     | 94 Check       |
| PLAT754_ALERT_4_C Contact Calc | 2.03000, | Rep   | 2.029(5) | ..... | Senseless s.u. |
| H(14)-C(15)                    | 1.555    | 1.555 | .....    | #     | 94 Check       |
| PLAT754_ALERT_4_C Contact Calc | 2.00000, | Rep   | 2.003(4) | ..... | Senseless s.u. |
| H(14)-C(17)                    | 1.555    | 1.555 | .....    | #     | 94 Check       |
| PLAT754_ALERT_4_C Contact Calc | 2.48000, | Rep   | 2.476(4) | ..... | Senseless s.u. |
| H(14)-C(18)                    | 1.555    | 1.555 | .....    | #     | 94 Check       |
| PLAT754_ALERT_4_C Contact Calc | 3.26000, | Rep   | 3.265(4) | ..... | Senseless s.u. |
| H(14)-C(22)                    | 1.555    | 1.555 | .....    | #     | 94 Check       |
| PLAT754_ALERT_4_C Contact Calc | 3.36000, | Rep   | 3.360(5) | ..... | Senseless s.u. |
| H(14)-C(27)                    | 1.555    | 3.766 | .....    | #     | 94 Check       |
| PLAT754_ALERT_4_C Contact Calc | 3.25000, | Rep   | 3.246(5) | ..... | Senseless s.u. |
| H(14)-H(1)                     | 1.555    | 1.555 | .....    | #     | 94 Check       |
| PLAT754_ALERT_4_C Contact Calc | 3.57000, | Rep   | 3.572(4) | ..... | Senseless s.u. |
| H(14)-H(8)                     | 1.555    | 1.555 | .....    | #     | 94 Check       |
| PLAT754_ALERT_4_C Contact Calc | 3.55000, | Rep   | 3.546(5) | ..... | Senseless s.u. |
| H(14)-H(11)                    | 1.555    | 1.555 | .....    | #     | 94 Check       |
| PLAT754_ALERT_4_C Contact Calc | 2.72000, | Rep   | 2.722(5) | ..... | Senseless s.u. |
| H(14)-H(12)                    | 1.555    | 1.555 | .....    | #     | 94 Check       |
| PLAT754_ALERT_4_C Contact Calc | 2.17000, | Rep   | 2.168(6) | ..... | Senseless s.u. |

|                                |          |       |          |       |                |
|--------------------------------|----------|-------|----------|-------|----------------|
| H(14)-H(13)                    | 1.555    | 1.555 | .....    | #     | 94 Check       |
| PLAT754_ALERT_4_C Contact Calc | 2.26000, | Rep   | 2.261(5) | ..... | Senseless s.u. |
| H(14)-H(15)                    | 1.555    | 1.555 | .....    | #     | 94 Check       |
| PLAT754_ALERT_4_C Contact Calc | 3.57000, | Rep   | 3.572(4) | ..... | Senseless s.u. |
| H(14)-H(19)                    | 1.555    | 1.555 | .....    | #     | 94 Check       |
| PLAT754_ALERT_4_C Contact Calc | 3.32000, | Rep   | 3.321(4) | ..... | Senseless s.u. |
| H(14)-H(21)                    | 1.555    | 3.766 | .....    | #     | 94 Check       |
| PLAT754_ALERT_4_C Contact Calc | 2.74000, | Rep   | 2.737(5) | ..... | Senseless s.u. |
| H(14)-H(22)                    | 1.555    | 3.766 | .....    | #     | 94 Check       |
| PLAT754_ALERT_4_C Contact Calc | 3.56000, | Rep   | 3.556(4) | ..... | Senseless s.u. |
| H(15)-C(2)                     | 1.555    | 1.555 | .....    | #     | 94 Check       |
| PLAT754_ALERT_4_C Contact Calc | 3.41000, | Rep   | 3.408(4) | ..... | Senseless s.u. |
| H(15)-C(3)                     | 1.555    | 1.555 | .....    | #     | 94 Check       |
| PLAT754_ALERT_4_C Contact Calc | 2.62000, | Rep   | 2.621(5) | ..... | Senseless s.u. |
| H(15)-C(16)                    | 1.555    | 1.555 | .....    | #     | 94 Check       |
| PLAT754_ALERT_4_C Contact Calc | 2.02000, | Rep   | 2.017(5) | ..... | Senseless s.u. |
| H(15)-C(17)                    | 1.555    | 1.555 | .....    | #     | 94 Check       |
| PLAT754_ALERT_4_C Contact Calc | 2.05000, | Rep   | 2.048(5) | ..... | Senseless s.u. |
| H(15)-C(19)                    | 1.555    | 1.555 | .....    | #     | 94 Check       |
| PLAT754_ALERT_4_C Contact Calc | 3.26000, | Rep   | 3.255(5) | ..... | Senseless s.u. |
| H(15)-C(20)                    | 1.555    | 1.555 | .....    | #     | 94 Check       |
| PLAT754_ALERT_4_C Contact Calc | 3.23000, | Rep   | 3.229(5) | ..... | Senseless s.u. |
| H(15)-C(22)                    | 1.555    | 1.555 | .....    | #     | 94 Check       |
| PLAT754_ALERT_4_C Contact Calc | 3.18000, | Rep   | 3.184(7) | ..... | Senseless s.u. |
| H(15)-C(43)                    | 1.555    | 4.555 | .....    | #     | 94 Check       |
| PLAT754_ALERT_4_C Contact Calc | 3.53000, | Rep   | 3.526(4) | ..... | Senseless s.u. |
| H(15)-H(1)                     | 1.555    | 1.555 | .....    | #     | 94 Check       |
| PLAT754_ALERT_4_C Contact Calc | 2.26000, | Rep   | 2.261(5) | ..... | Senseless s.u. |
| H(15)-H(14)                    | 1.555    | 1.555 | .....    | #     | 94 Check       |
| PLAT754_ALERT_4_C Contact Calc | 2.35000, | Rep   | 2.354(5) | ..... | Senseless s.u. |
| H(15)-H(16)                    | 1.555    | 1.555 | .....    | #     | 94 Check       |
| PLAT754_ALERT_4_C Contact Calc | 3.15000, | Rep   | 3.154(5) | ..... | Senseless s.u. |
| H(15)-H(24)                    | 1.555    | 1.545 | .....    | #     | 94 Check       |
| PLAT754_ALERT_4_C Contact Calc | 3.50000, | Rep   | 3.500(6) | ..... | Senseless s.u. |
| H(15)-H(25)                    | 1.555    | 1.545 | .....    | #     | 94 Check       |
| PLAT754_ALERT_4_C Contact Calc | 3.07000, | Rep   | 3.075(5) | ..... | Senseless s.u. |
| H(16)-O(2)                     | 1.555    | 4.555 | .....    | #     | 94 Check       |
| PLAT754_ALERT_4_C Contact Calc | 3.53000, | Rep   | 3.533(5) | ..... | Senseless s.u. |
| H(16)-C(6)                     | 1.555    | 1.545 | .....    | #     | 94 Check       |
| PLAT754_ALERT_4_C Contact Calc | 3.27000, | Rep   | 3.268(5) | ..... | Senseless s.u. |
| H(16)-C(17)                    | 1.555    | 1.555 | .....    | #     | 94 Check       |
| PLAT754_ALERT_4_C Contact Calc | 2.05000, | Rep   | 2.053(5) | ..... | Senseless s.u. |
| H(16)-C(18)                    | 1.555    | 1.555 | .....    | #     | 94 Check       |
| PLAT754_ALERT_4_C Contact Calc | 2.02000, | Rep   | 2.025(6) | ..... | Senseless s.u. |
| H(16)-C(20)                    | 1.555    | 1.555 | .....    | #     | 94 Check       |
| PLAT754_ALERT_4_C Contact Calc | 3.23000, | Rep   | 3.230(6) | ..... | Senseless s.u. |
| H(16)-C(21)                    | 1.555    | 1.555 | .....    | #     | 94 Check       |
| PLAT754_ALERT_4_C Contact Calc | 3.56000, | Rep   | 3.561(5) | ..... | Senseless s.u. |
| H(16)-C(34)                    | 1.555    | 4.555 | .....    | #     | 94 Check       |
| PLAT754_ALERT_4_C Contact Calc | 3.47000, | Rep   | 3.470(6) | ..... | Senseless s.u. |
| H(16)-C(44)                    | 1.555    | 4.555 | .....    | #     | 94 Check       |
| PLAT754_ALERT_4_C Contact Calc | 3.49000, | Rep   | 3.487(5) | ..... | Senseless s.u. |
| H(16)-H(1)                     | 1.555    | 3.656 | .....    | #     | 94 Check       |
| PLAT754_ALERT_4_C Contact Calc | 3.35000, | Rep   | 3.354(5) | ..... | Senseless s.u. |
| H(16)-H(4)                     | 1.555    | 1.545 | .....    | #     | 94 Check       |
| PLAT754_ALERT_4_C Contact Calc | 3.44000, | Rep   | 3.444(7) | ..... | Senseless s.u. |
| H(16)-H(7)                     | 1.555    | 3.656 | .....    | #     | 94 Check       |
| PLAT754_ALERT_4_C Contact Calc | 3.29000, | Rep   | 3.291(6) | ..... | Senseless s.u. |
| H(16)-H(8)                     | 1.555    | 3.656 | .....    | #     | 94 Check       |
| PLAT754_ALERT_4_C Contact Calc | 2.35000, | Rep   | 2.354(5) | ..... | Senseless s.u. |
| H(16)-H(15)                    | 1.555    | 1.555 | .....    | #     | 94 Check       |
| PLAT754_ALERT_4_C Contact Calc | 2.32000, | Rep   | 2.321(5) | ..... | Senseless s.u. |



|                                |          |       |          |       |                |
|--------------------------------|----------|-------|----------|-------|----------------|
| H(16)-H(17)                    | 1.555    | 1.555 | .....    | #     | 94 Check       |
| PLAT754_ALERT_4_C Contact Calc | 3.22000, | Rep   | 3.220(6) | ..... | Senseless s.u. |
| H(16)-H(24)                    | 1.555    | 1.545 | .....    | #     | 94 Check       |
| PLAT754_ALERT_4_C Contact Calc | 3.07000, | Rep   | 3.070(5) | ..... | Senseless s.u. |
| H(16)-H(26)                    | 1.555    | 4.555 | .....    | #     | 94 Check       |
| PLAT754_ALERT_4_C Contact Calc | 3.51000, | Rep   | 3.512(5) | ..... | Senseless s.u. |
| H(17)-N(1)                     | 1.555    | 1.545 | .....    | #     | 94 Check       |
| PLAT754_ALERT_4_C Contact Calc | 3.34000, | Rep   | 3.342(6) | ..... | Senseless s.u. |
| H(17)-C(3)                     | 1.555    | 3.656 | .....    | #     | 94 Check       |
| PLAT754_ALERT_4_C Contact Calc | 2.98000, | Rep   | 2.984(5) | ..... | Senseless s.u. |
| H(17)-C(5)                     | 1.555    | 1.545 | .....    | #     | 94 Check       |
| PLAT754_ALERT_4_C Contact Calc | 3.13000, | Rep   | 3.128(5) | ..... | Senseless s.u. |
| H(17)-C(6)                     | 1.555    | 1.545 | .....    | #     | 94 Check       |
| PLAT754_ALERT_4_C Contact Calc | 3.36000, | Rep   | 3.358(6) | ..... | Senseless s.u. |
| H(17)-C(7)                     | 1.555    | 1.545 | .....    | #     | 94 Check       |
| PLAT754_ALERT_4_C Contact Calc | 3.42000, | Rep   | 3.415(6) | ..... | Senseless s.u. |
| H(17)-C(8)                     | 1.555    | 1.545 | .....    | #     | 94 Check       |
| PLAT754_ALERT_4_C Contact Calc | 3.28000, | Rep   | 3.279(5) | ..... | Senseless s.u. |
| H(17)-C(9)                     | 1.555    | 1.545 | .....    | #     | 94 Check       |
| PLAT754_ALERT_4_C Contact Calc | 3.08000, | Rep   | 3.084(4) | ..... | Senseless s.u. |
| H(17)-C(10)                    | 1.555    | 1.545 | .....    | #     | 94 Check       |
| PLAT754_ALERT_4_C Contact Calc | 3.58000, | Rep   | 3.577(5) | ..... | Senseless s.u. |
| H(17)-C(11)                    | 1.555    | 1.545 | .....    | #     | 94 Check       |
| PLAT754_ALERT_4_C Contact Calc | 3.26000, | Rep   | 3.258(4) | ..... | Senseless s.u. |
| H(17)-C(18)                    | 1.555    | 1.555 | .....    | #     | 94 Check       |
| PLAT754_ALERT_4_C Contact Calc | 2.02000, | Rep   | 2.020(5) | ..... | Senseless s.u. |
| H(17)-C(19)                    | 1.555    | 1.555 | .....    | #     | 94 Check       |
| PLAT754_ALERT_4_C Contact Calc | 2.01000, | Rep   | 2.014(6) | ..... | Senseless s.u. |
| H(17)-C(21)                    | 1.555    | 1.555 | .....    | #     | 94 Check       |
| PLAT754_ALERT_4_C Contact Calc | 3.24000, | Rep   | 3.242(5) | ..... | Senseless s.u. |
| H(17)-C(22)                    | 1.555    | 1.555 | .....    | #     | 94 Check       |
| PLAT754_ALERT_4_C Contact Calc | 2.62000, | Rep   | 2.618(6) | ..... | Senseless s.u. |
| H(17)-H(1)                     | 1.555    | 3.656 | .....    | #     | 94 Check       |
| PLAT754_ALERT_4_C Contact Calc | 3.55000, | Rep   | 3.550(5) | ..... | Senseless s.u. |
| H(17)-H(2)                     | 1.555    | 3.656 | .....    | #     | 94 Check       |
| PLAT754_ALERT_4_C Contact Calc | 3.38000, | Rep   | 3.375(5) | ..... | Senseless s.u. |
| H(17)-H(3)                     | 1.555    | 1.545 | .....    | #     | 94 Check       |
| PLAT754_ALERT_4_C Contact Calc | 3.59000, | Rep   | 3.588(5) | ..... | Senseless s.u. |
| H(17)-H(4)                     | 1.555    | 1.545 | .....    | #     | 94 Check       |
| PLAT754_ALERT_4_C Contact Calc | 2.32000, | Rep   | 2.321(5) | ..... | Senseless s.u. |
| H(17)-H(16)                    | 1.555    | 1.555 | .....    | #     | 94 Check       |
| PLAT754_ALERT_4_C Contact Calc | 2.30000, | Rep   | 2.305(7) | ..... | Senseless s.u. |
| H(17)-H(18)                    | 1.555    | 1.555 | .....    | #     | 94 Check       |
| PLAT754_ALERT_4_C Contact Calc | 2.89000, | Rep   | 2.894(4) | ..... | Senseless s.u. |
| H(18)-N(1)                     | 1.555    | 1.545 | .....    | #     | 94 Check       |
| PLAT754_ALERT_4_C Contact Calc | 3.46000, | Rep   | 3.460(4) | ..... | Senseless s.u. |
| H(18)-C(11)                    | 1.555    | 1.545 | .....    | #     | 94 Check       |
| PLAT754_ALERT_4_C Contact Calc | 3.25000, | Rep   | 3.254(6) | ..... | Senseless s.u. |
| H(18)-C(13)                    | 1.555    | 2.645 | .....    | #     | 94 Check       |
| PLAT754_ALERT_4_C Contact Calc | 3.27000, | Rep   | 3.273(4) | ..... | Senseless s.u. |
| H(18)-C(17)                    | 1.555    | 1.555 | .....    | #     | 94 Check       |
| PLAT754_ALERT_4_C Contact Calc | 3.23000, | Rep   | 3.227(6) | ..... | Senseless s.u. |
| H(18)-C(19)                    | 1.555    | 1.555 | .....    | #     | 94 Check       |
| PLAT754_ALERT_4_C Contact Calc | 2.01000, | Rep   | 2.007(6) | ..... | Senseless s.u. |
| H(18)-C(20)                    | 1.555    | 1.555 | .....    | #     | 94 Check       |
| PLAT754_ALERT_4_C Contact Calc | 2.04000, | Rep   | 2.043(4) | ..... | Senseless s.u. |
| H(18)-C(22)                    | 1.555    | 1.555 | .....    | #     | 94 Check       |
| PLAT754_ALERT_4_C Contact Calc | 3.48000, | Rep   | 3.481(6) | ..... | Senseless s.u. |
| H(18)-C(37)                    | 1.555    | 1.545 | .....    | #     | 94 Check       |
| PLAT754_ALERT_4_C Contact Calc | 3.44000, | Rep   | 3.439(7) | ..... | Senseless s.u. |
| H(18)-H(1)                     | 1.555    | 3.656 | .....    | #     | 94 Check       |
| PLAT754_ALERT_4_C Contact Calc | 2.68000, | Rep   | 2.680(5) | ..... | Senseless s.u. |

|                                |          |       |          |       |                |
|--------------------------------|----------|-------|----------|-------|----------------|
| H(18)-H(9)                     | 1.555    | 2.645 | .....    | #     | 94 Check       |
| PLAT754_ALERT_4_C Contact Calc | 3.01000, | Rep   | 3.014(6) | ..... | Senseless s.u. |
| H(18)-H(10)                    | 1.555    | 2.645 | .....    | #     | 94 Check       |
| PLAT754_ALERT_4_C Contact Calc | 2.30000, | Rep   | 2.305(7) | ..... | Senseless s.u. |
| H(18)-H(17)                    | 1.555    | 1.555 | .....    | #     | 94 Check       |
| PLAT754_ALERT_4_C Contact Calc | 2.34000, | Rep   | 2.342(4) | ..... | Senseless s.u. |
| H(18)-H(19)                    | 1.555    | 1.555 | .....    | #     | 94 Check       |
| PLAT754_ALERT_4_C Contact Calc | 2.85000, | Rep   | 2.845(6) | ..... | Senseless s.u. |
| H(18)-H(31)                    | 1.555    | 1.545 | .....    | #     | 94 Check       |
| PLAT754_ALERT_4_C Contact Calc | 3.35000, | Rep   | 3.348(7) | ..... | Senseless s.u. |
| H(18)-H(32)                    | 1.555    | 1.545 | .....    | #     | 94 Check       |
| PLAT754_ALERT_4_C Contact Calc | 2.47000, | Rep   | 2.466(3) | ..... | Senseless s.u. |
| H(19)-O(1)                     | 1.555    | 1.555 | .....    | #     | 94 Check       |
| PLAT754_ALERT_4_C Contact Calc | 3.36000, | Rep   | 3.362(4) | ..... | Senseless s.u. |
| H(19)-C(2)                     | 1.555    | 1.555 | .....    | #     | 94 Check       |
| PLAT754_ALERT_4_C Contact Calc | 2.91000, | Rep   | 2.914(5) | ..... | Senseless s.u. |
| H(19)-C(12)                    | 1.555    | 1.555 | .....    | #     | 94 Check       |
| PLAT754_ALERT_4_C Contact Calc | 3.43000, | Rep   | 3.429(4) | ..... | Senseless s.u. |
| H(19)-C(13)                    | 1.555    | 1.555 | .....    | #     | 94 Check       |
| PLAT754_ALERT_4_C Contact Calc | 2.92000, | Rep   | 2.920(4) | ..... | Senseless s.u. |
| H(19)-C(15)                    | 1.555    | 1.555 | .....    | #     | 94 Check       |
| PLAT754_ALERT_4_C Contact Calc | 2.72000, | Rep   | 2.719(4) | ..... | Senseless s.u. |
| H(19)-C(16)                    | 1.555    | 1.555 | .....    | #     | 94 Check       |
| PLAT754_ALERT_4_C Contact Calc | 2.03000, | Rep   | 2.028(5) | ..... | Senseless s.u. |
| H(19)-C(17)                    | 1.555    | 1.555 | .....    | #     | 94 Check       |
| PLAT754_ALERT_4_C Contact Calc | 3.23000, | Rep   | 3.227(5) | ..... | Senseless s.u. |
| H(19)-C(18)                    | 1.555    | 1.555 | .....    | #     | 94 Check       |
| PLAT754_ALERT_4_C Contact Calc | 3.24000, | Rep   | 3.236(6) | ..... | Senseless s.u. |
| H(19)-C(20)                    | 1.555    | 1.555 | .....    | #     | 94 Check       |
| PLAT754_ALERT_4_C Contact Calc | 2.03000, | Rep   | 2.034(5) | ..... | Senseless s.u. |
| H(19)-C(21)                    | 1.555    | 1.555 | .....    | #     | 94 Check       |
| PLAT754_ALERT_4_C Contact Calc | 2.64000, | Rep   | 2.641(5) | ..... | Senseless s.u. |
| H(19)-H(8)                     | 1.555    | 1.555 | .....    | #     | 94 Check       |
| PLAT754_ALERT_4_C Contact Calc | 3.53000, | Rep   | 3.525(5) | ..... | Senseless s.u. |
| H(19)-H(9)                     | 1.555    | 1.555 | .....    | #     | 94 Check       |
| PLAT754_ALERT_4_C Contact Calc | 3.57000, | Rep   | 3.572(4) | ..... | Senseless s.u. |
| H(19)-H(9)                     | 1.555    | 2.645 | .....    | #     | 94 Check       |
| PLAT754_ALERT_4_C Contact Calc | 2.92000, | Rep   | 2.919(5) | ..... | Senseless s.u. |
| H(19)-H(10)                    | 1.555    | 2.645 | .....    | #     | 94 Check       |
| PLAT754_ALERT_4_C Contact Calc | 2.34000, | Rep   | 2.341(5) | ..... | Senseless s.u. |
| H(19)-H(12)                    | 1.555    | 1.555 | .....    | #     | 94 Check       |
| PLAT754_ALERT_4_C Contact Calc | 3.57000, | Rep   | 3.572(4) | ..... | Senseless s.u. |
| H(19)-H(14)                    | 1.555    | 1.555 | .....    | #     | 94 Check       |
| PLAT754_ALERT_4_C Contact Calc | 2.34000, | Rep   | 2.342(4) | ..... | Senseless s.u. |
| H(19)-H(18)                    | 1.555    | 1.555 | .....    | #     | 94 Check       |
| PLAT754_ALERT_4_C Contact Calc | 2.96000, | Rep   | 2.958(5) | ..... | Senseless s.u. |
| H(19)-H(30)                    | 1.555    | 1.545 | .....    | #     | 94 Check       |
| PLAT754_ALERT_4_C Contact Calc | 2.59000, | Rep   | 2.587(6) | ..... | Senseless s.u. |
| H(20)-N(2)                     | 1.555    | 2.745 | .....    | #     | 94 Check       |
| PLAT754_ALERT_4_C Contact Calc | 3.35000, | Rep   | 3.352(5) | ..... | Senseless s.u. |
| H(20)-C(23)                    | 1.555    | 1.555 | .....    | #     | 94 Check       |
| PLAT754_ALERT_4_C Contact Calc | 2.14000, | Rep   | 2.139(5) | ..... | Senseless s.u. |
| H(20)-C(24)                    | 1.555    | 1.555 | .....    | #     | 94 Check       |
| PLAT754_ALERT_4_C Contact Calc | 1.98000, | Rep   | 1.981(6) | ..... | Senseless s.u. |
| H(20)-C(26)                    | 1.555    | 1.555 | .....    | #     | 94 Check       |
| PLAT754_ALERT_4_C Contact Calc | 3.30000, | Rep   | 3.297(6) | ..... | Senseless s.u. |
| H(20)-C(32)                    | 1.555    | 1.555 | .....    | #     | 94 Check       |
| PLAT754_ALERT_4_C Contact Calc | 3.50000, | Rep   | 3.496(6) | ..... | Senseless s.u. |
| H(20)-C(33)                    | 1.555    | 2.745 | .....    | #     | 94 Check       |
| PLAT754_ALERT_4_C Contact Calc | 2.64000, | Rep   | 2.643(4) | ..... | Senseless s.u. |
| H(20)-C(34)                    | 1.555    | 1.555 | .....    | #     | 94 Check       |
| PLAT754_ALERT_4_C Contact Calc | 3.15000, | Rep   | 3.150(5) | ..... | Senseless s.u. |

|                                |          |       |          |       |                |
|--------------------------------|----------|-------|----------|-------|----------------|
| H(20)-C(38)                    | 1.555    | 1.555 | .....    | #     | 94 Check       |
| PLAT754_ALERT_4_C Contact Calc | 3.48000, | Rep   | 3.484(5) | ..... | Senseless s.u. |
| H(20)-C(39)                    | 1.555    | 1.555 | .....    | #     | 94 Check       |
| PLAT754_ALERT_4_C Contact Calc | 3.47000, | Rep   | 3.469(5) | ..... | Senseless s.u. |
| H(20)-C(40)                    | 1.555    | 1.555 | .....    | #     | 94 Check       |
| PLAT754_ALERT_4_C Contact Calc | 3.34000, | Rep   | 3.338(7) | ..... | Senseless s.u. |
| H(20)-C(41)                    | 1.555    | 2.755 | .....    | #     | 94 Check       |
| PLAT754_ALERT_4_C Contact Calc | 2.27000, | Rep   | 2.267(5) | ..... | Senseless s.u. |
| H(20)-H(21)                    | 1.555    | 1.555 | .....    | #     | 94 Check       |
| PLAT754_ALERT_4_C Contact Calc | 2.50000, | Rep   | 2.499(4) | ..... | Senseless s.u. |
| H(20)-H(26)                    | 1.555    | 1.555 | .....    | #     | 94 Check       |
| PLAT754_ALERT_4_C Contact Calc | 2.75000, | Rep   | 2.755(4) | ..... | Senseless s.u. |
| H(20)-H(27)                    | 1.555    | 1.555 | .....    | #     | 94 Check       |
| PLAT754_ALERT_4_C Contact Calc | 2.88000, | Rep   | 2.876(5) | ..... | Senseless s.u. |
| H(21)-C(5)                     | 1.555    | 3.766 | .....    | #     | 94 Check       |
| PLAT754_ALERT_4_C Contact Calc | 3.05000, | Rep   | 3.053(4) | ..... | Senseless s.u. |
| H(21)-C(6)                     | 1.555    | 3.766 | .....    | #     | 94 Check       |
| PLAT754_ALERT_4_C Contact Calc | 3.55000, | Rep   | 3.548(5) | ..... | Senseless s.u. |
| H(21)-C(7)                     | 1.555    | 3.766 | .....    | #     | 94 Check       |
| PLAT754_ALERT_4_C Contact Calc | 3.27000, | Rep   | 3.270(4) | ..... | Senseless s.u. |
| H(21)-C(10)                    | 1.555    | 3.766 | .....    | #     | 94 Check       |
| PLAT754_ALERT_4_C Contact Calc | 3.32000, | Rep   | 3.318(4) | ..... | Senseless s.u. |
| H(21)-C(24)                    | 1.555    | 1.555 | .....    | #     | 94 Check       |
| PLAT754_ALERT_4_C Contact Calc | 1.97000, | Rep   | 1.973(4) | ..... | Senseless s.u. |
| H(21)-C(25)                    | 1.555    | 1.555 | .....    | #     | 94 Check       |
| PLAT754_ALERT_4_C Contact Calc | 2.69000, | Rep   | 2.686(7) | ..... | Senseless s.u. |
| H(21)-C(27)                    | 1.555    | 1.555 | .....    | #     | 94 Check       |
| PLAT754_ALERT_4_C Contact Calc | 3.31000, | Rep   | 3.306(5) | ..... | Senseless s.u. |
| H(21)-C(31)                    | 1.555    | 1.555 | .....    | #     | 94 Check       |
| PLAT754_ALERT_4_C Contact Calc | 2.08000, | Rep   | 2.084(6) | ..... | Senseless s.u. |
| H(21)-C(32)                    | 1.555    | 1.555 | .....    | #     | 94 Check       |
| PLAT754_ALERT_4_C Contact Calc | 3.08000, | Rep   | 3.083(5) | ..... | Senseless s.u. |
| H(21)-H(3)                     | 1.555    | 3.766 | .....    | #     | 94 Check       |
| PLAT754_ALERT_4_C Contact Calc | 3.35000, | Rep   | 3.354(4) | ..... | Senseless s.u. |
| H(21)-H(4)                     | 1.555    | 3.766 | .....    | #     | 94 Check       |
| PLAT754_ALERT_4_C Contact Calc | 3.32000, | Rep   | 3.321(4) | ..... | Senseless s.u. |
| H(21)-H(14)                    | 1.555    | 3.766 | .....    | #     | 94 Check       |
| PLAT754_ALERT_4_C Contact Calc | 2.27000, | Rep   | 2.267(5) | ..... | Senseless s.u. |
| H(21)-H(20)                    | 1.555    | 1.555 | .....    | #     | 94 Check       |
| PLAT754_ALERT_4_C Contact Calc | 2.52000, | Rep   | 2.517(7) | ..... | Senseless s.u. |
| H(21)-H(22)                    | 1.555    | 1.555 | .....    | #     | 94 Check       |
| PLAT754_ALERT_4_C Contact Calc | 3.17000, | Rep   | 3.164(4) | ..... | Senseless s.u. |
| H(22)-C(7)                     | 1.555    | 3.766 | .....    | #     | 94 Check       |
| PLAT754_ALERT_4_C Contact Calc | 2.93000, | Rep   | 2.934(4) | ..... | Senseless s.u. |
| H(22)-C(8)                     | 1.555    | 3.766 | .....    | #     | 94 Check       |
| PLAT754_ALERT_4_C Contact Calc | 3.28000, | Rep   | 3.277(5) | ..... | Senseless s.u. |
| H(22)-C(9)                     | 1.555    | 3.766 | .....    | #     | 94 Check       |
| PLAT754_ALERT_4_C Contact Calc | 3.25000, | Rep   | 3.250(4) | ..... | Senseless s.u. |
| H(22)-C(15)                    | 1.555    | 3.766 | .....    | #     | 94 Check       |
| PLAT754_ALERT_4_C Contact Calc | 3.44000, | Rep   | 3.438(4) | ..... | Senseless s.u. |
| H(22)-C(16)                    | 1.555    | 3.766 | .....    | #     | 94 Check       |
| PLAT754_ALERT_4_C Contact Calc | 2.65000, | Rep   | 2.652(6) | ..... | Senseless s.u. |
| H(22)-C(26)                    | 1.555    | 1.555 | .....    | #     | 94 Check       |
| PLAT754_ALERT_4_C Contact Calc | 2.01000, | Rep   | 2.013(6) | ..... | Senseless s.u. |
| H(22)-C(28)                    | 1.555    | 1.555 | .....    | #     | 94 Check       |
| PLAT754_ALERT_4_C Contact Calc | 3.24000, | Rep   | 3.236(5) | ..... | Senseless s.u. |
| H(22)-C(29)                    | 1.555    | 1.555 | .....    | #     | 94 Check       |
| PLAT754_ALERT_4_C Contact Calc | 3.25000, | Rep   | 3.251(4) | ..... | Senseless s.u. |
| H(22)-C(31)                    | 1.555    | 1.555 | .....    | #     | 94 Check       |
| PLAT754_ALERT_4_C Contact Calc | 2.03000, | Rep   | 2.025(4) | ..... | Senseless s.u. |
| H(22)-C(32)                    | 1.555    | 1.555 | .....    | #     | 94 Check       |
| PLAT754_ALERT_4_C Contact Calc | 3.53000, | Rep   | 3.529(5) | ..... | Senseless s.u. |

|                                |          |       |          |       |                |
|--------------------------------|----------|-------|----------|-------|----------------|
| H(22)-H(5)                     | 1.555    | 1.555 | .....    | #     | 94 Check       |
| PLAT754_ALERT_4_C Contact Calc | 3.46000, | Rep   | 3.454(4) | ..... | Senseless s.u. |
| H(22)-H(5)                     | 1.555    | 3.766 | .....    | #     | 94 Check       |
| PLAT754_ALERT_4_C Contact Calc | 3.13000, | Rep   | 3.131(4) | ..... | Senseless s.u. |
| H(22)-H(6)                     | 1.555    | 3.766 | .....    | #     | 94 Check       |
| PLAT754_ALERT_4_C Contact Calc | 2.47000, | Rep   | 2.467(4) | ..... | Senseless s.u. |
| H(22)-H(13)                    | 1.555    | 3.766 | .....    | #     | 94 Check       |
| PLAT754_ALERT_4_C Contact Calc | 2.74000, | Rep   | 2.737(5) | ..... | Senseless s.u. |
| H(22)-H(14)                    | 1.555    | 3.766 | .....    | #     | 94 Check       |
| PLAT754_ALERT_4_C Contact Calc | 2.52000, | Rep   | 2.517(7) | ..... | Senseless s.u. |
| H(22)-H(21)                    | 1.555    | 1.555 | .....    | #     | 94 Check       |
| PLAT754_ALERT_4_C Contact Calc | 2.32000, | Rep   | 2.314(7) | ..... | Senseless s.u. |
| H(22)-H(23)                    | 1.555    | 1.555 | .....    | #     | 94 Check       |
| PLAT754_ALERT_4_C Contact Calc | 2.84000, | Rep   | 2.842(6) | ..... | Senseless s.u. |
| H(23)-N(2)                     | 1.555    | 3.776 | .....    | #     | 94 Check       |
| PLAT754_ALERT_4_C Contact Calc | 2.03000, | Rep   | 2.026(6) | ..... | Senseless s.u. |
| H(23)-C(27)                    | 1.555    | 1.555 | .....    | #     | 94 Check       |
| PLAT754_ALERT_4_C Contact Calc | 2.03000, | Rep   | 2.026(4) | ..... | Senseless s.u. |
| H(23)-C(29)                    | 1.555    | 1.555 | .....    | #     | 94 Check       |
| PLAT754_ALERT_4_C Contact Calc | 3.25000, | Rep   | 3.248(4) | ..... | Senseless s.u. |
| H(23)-C(30)                    | 1.555    | 1.555 | .....    | #     | 94 Check       |
| PLAT754_ALERT_4_C Contact Calc | 3.26000, | Rep   | 3.261(6) | ..... | Senseless s.u. |
| H(23)-C(32)                    | 1.555    | 1.555 | .....    | #     | 94 Check       |
| PLAT754_ALERT_4_C Contact Calc | 3.22000, | Rep   | 3.219(5) | ..... | Senseless s.u. |
| H(23)-C(33)                    | 1.555    | 3.776 | .....    | #     | 94 Check       |
| PLAT754_ALERT_4_C Contact Calc | 3.48000, | Rep   | 3.481(5) | ..... | Senseless s.u. |
| H(23)-C(40)                    | 1.555    | 3.766 | .....    | #     | 94 Check       |
| PLAT754_ALERT_4_C Contact Calc | 3.36000, | Rep   | 3.357(6) | ..... | Senseless s.u. |
| H(23)-C(41)                    | 1.555    | 3.766 | .....    | #     | 94 Check       |
| PLAT754_ALERT_4_C Contact Calc | 3.33000, | Rep   | 3.334(6) | ..... | Senseless s.u. |
| H(23)-H(4)                     | 1.555    | 1.555 | .....    | #     | 94 Check       |
| PLAT754_ALERT_4_C Contact Calc | 3.55000, | Rep   | 3.555(5) | ..... | Senseless s.u. |
| H(23)-H(5)                     | 1.555    | 1.555 | .....    | #     | 94 Check       |
| PLAT754_ALERT_4_C Contact Calc | 2.80000, | Rep   | 2.798(5) | ..... | Senseless s.u. |
| H(23)-H(13)                    | 1.555    | 3.766 | .....    | #     | 94 Check       |
| PLAT754_ALERT_4_C Contact Calc | 2.32000, | Rep   | 2.314(7) | ..... | Senseless s.u. |
| H(23)-H(22)                    | 1.555    | 1.555 | .....    | #     | 94 Check       |
| PLAT754_ALERT_4_C Contact Calc | 2.32000, | Rep   | 2.325(5) | ..... | Senseless s.u. |
| H(23)-H(24)                    | 1.555    | 1.555 | .....    | #     | 94 Check       |
| PLAT754_ALERT_4_C Contact Calc | 3.59000, | Rep   | 3.587(5) | ..... | Senseless s.u. |
| H(23)-H(25)                    | 1.555    | 3.776 | .....    | #     | 94 Check       |
| PLAT754_ALERT_4_C Contact Calc | 2.95000, | Rep   | 2.951(5) | ..... | Senseless s.u. |
| H(24)-N(2)                     | 1.555    | 3.776 | .....    | #     | 94 Check       |
| PLAT754_ALERT_4_C Contact Calc | 3.24000, | Rep   | 3.243(5) | ..... | Senseless s.u. |
| H(24)-C(18)                    | 1.555    | 1.565 | .....    | #     | 94 Check       |
| PLAT754_ALERT_4_C Contact Calc | 3.28000, | Rep   | 3.276(5) | ..... | Senseless s.u. |
| H(24)-C(19)                    | 1.555    | 1.565 | .....    | #     | 94 Check       |
| PLAT754_ALERT_4_C Contact Calc | 3.24000, | Rep   | 3.241(6) | ..... | Senseless s.u. |
| H(24)-C(27)                    | 1.555    | 1.555 | .....    | #     | 94 Check       |
| PLAT754_ALERT_4_C Contact Calc | 2.03000, | Rep   | 2.029(6) | ..... | Senseless s.u. |
| H(24)-C(28)                    | 1.555    | 1.555 | .....    | #     | 94 Check       |
| PLAT754_ALERT_4_C Contact Calc | 2.04000, | Rep   | 2.040(6) | ..... | Senseless s.u. |
| H(24)-C(30)                    | 1.555    | 1.555 | .....    | #     | 94 Check       |
| PLAT754_ALERT_4_C Contact Calc | 3.26000, | Rep   | 3.257(6) | ..... | Senseless s.u. |
| H(24)-C(31)                    | 1.555    | 1.555 | .....    | #     | 94 Check       |
| PLAT754_ALERT_4_C Contact Calc | 3.29000, | Rep   | 3.286(4) | ..... | Senseless s.u. |
| H(24)-C(33)                    | 1.555    | 3.776 | .....    | #     | 94 Check       |
| PLAT754_ALERT_4_C Contact Calc | 3.33000, | Rep   | 3.333(5) | ..... | Senseless s.u. |
| H(24)-H(4)                     | 1.555    | 1.555 | .....    | #     | 94 Check       |
| PLAT754_ALERT_4_C Contact Calc | 3.15000, | Rep   | 3.154(5) | ..... | Senseless s.u. |
| H(24)-H(15)                    | 1.555    | 1.565 | .....    | #     | 94 Check       |
| PLAT754_ALERT_4_C Contact Calc | 3.22000, | Rep   | 3.220(6) | ..... | Senseless s.u. |

|                                |          |       |          |       |                |
|--------------------------------|----------|-------|----------|-------|----------------|
| H(24)-H(16)                    | 1.555    | 1.565 | .....    | #     | 94 Check       |
| PLAT754_ALERT_4_C Contact Calc | 2.32000, | Rep   | 2.325(5) | ..... | Senseless s.u. |
| H(24)-H(23)                    | 1.555    | 1.555 | .....    | #     | 94 Check       |
| PLAT754_ALERT_4_C Contact Calc | 2.35000, | Rep   | 2.346(5) | ..... | Senseless s.u. |
| H(24)-H(25)                    | 1.555    | 1.555 | .....    | #     | 94 Check       |
| PLAT754_ALERT_4_C Contact Calc | 3.04000, | Rep   | 3.042(5) | ..... | Senseless s.u. |
| H(25)-C(17)                    | 1.555    | 1.565 | .....    | #     | 94 Check       |
| PLAT754_ALERT_4_C Contact Calc | 3.14000, | Rep   | 3.144(6) | ..... | Senseless s.u. |
| H(25)-C(18)                    | 1.555    | 1.565 | .....    | #     | 94 Check       |
| PLAT754_ALERT_4_C Contact Calc | 3.50000, | Rep   | 3.498(7) | ..... | Senseless s.u. |
| H(25)-C(19)                    | 1.555    | 1.565 | .....    | #     | 94 Check       |
| PLAT754_ALERT_4_C Contact Calc | 3.30000, | Rep   | 3.301(4) | ..... | Senseless s.u. |
| H(25)-C(22)                    | 1.555    | 1.565 | .....    | #     | 94 Check       |
| PLAT754_ALERT_4_C Contact Calc | 2.70000, | Rep   | 2.702(5) | ..... | Senseless s.u. |
| H(25)-C(23)                    | 1.555    | 1.555 | .....    | #     | 94 Check       |
| PLAT754_ALERT_4_C Contact Calc | 3.25000, | Rep   | 3.250(4) | ..... | Senseless s.u. |
| H(25)-C(28)                    | 1.555    | 1.555 | .....    | #     | 94 Check       |
| PLAT754_ALERT_4_C Contact Calc | 3.55000, | Rep   | 3.545(4) | ..... | Senseless s.u. |
| H(25)-C(28)                    | 1.555    | 3.776 | .....    | #     | 94 Check       |
| PLAT754_ALERT_4_C Contact Calc | 2.04000, | Rep   | 2.037(4) | ..... | Senseless s.u. |
| H(25)-C(29)                    | 1.555    | 1.555 | .....    | #     | 94 Check       |
| PLAT754_ALERT_4_C Contact Calc | 2.02000, | Rep   | 2.021(5) | ..... | Senseless s.u. |
| H(25)-C(31)                    | 1.555    | 1.555 | .....    | #     | 94 Check       |
| PLAT754_ALERT_4_C Contact Calc | 3.27000, | Rep   | 3.268(5) | ..... | Senseless s.u. |
| H(25)-C(32)                    | 1.555    | 1.555 | .....    | #     | 94 Check       |
| PLAT754_ALERT_4_C Contact Calc | 3.37000, | Rep   | 3.367(6) | ..... | Senseless s.u. |
| H(25)-C(33)                    | 1.555    | 1.555 | .....    | #     | 94 Check       |
| PLAT754_ALERT_4_C Contact Calc | 2.75000, | Rep   | 2.750(5) | ..... | Senseless s.u. |
| H(25)-C(36)                    | 1.555    | 1.555 | .....    | #     | 94 Check       |
| PLAT754_ALERT_4_C Contact Calc | 3.32000, | Rep   | 3.323(4) | ..... | Senseless s.u. |
| H(25)-C(37)                    | 1.555    | 1.555 | .....    | #     | 94 Check       |
| PLAT754_ALERT_4_C Contact Calc | 3.37000, | Rep   | 3.374(4) | ..... | Senseless s.u. |
| H(25)-H(12)                    | 1.555    | 1.565 | .....    | #     | 94 Check       |
| PLAT754_ALERT_4_C Contact Calc | 3.40000, | Rep   | 3.404(4) | ..... | Senseless s.u. |
| H(25)-H(13)                    | 1.555    | 1.565 | .....    | #     | 94 Check       |
| PLAT754_ALERT_4_C Contact Calc | 3.50000, | Rep   | 3.500(6) | ..... | Senseless s.u. |
| H(25)-H(15)                    | 1.555    | 1.565 | .....    | #     | 94 Check       |
| PLAT754_ALERT_4_C Contact Calc | 3.59000, | Rep   | 3.587(5) | ..... | Senseless s.u. |
| H(25)-H(23)                    | 1.555    | 3.776 | .....    | #     | 94 Check       |
| PLAT754_ALERT_4_C Contact Calc | 2.35000, | Rep   | 2.346(5) | ..... | Senseless s.u. |
| H(25)-H(24)                    | 1.555    | 1.555 | .....    | #     | 94 Check       |
| PLAT754_ALERT_4_C Contact Calc | 2.21000, | Rep   | 2.206(5) | ..... | Senseless s.u. |
| H(25)-H(30)                    | 1.555    | 1.555 | .....    | #     | 94 Check       |
| PLAT754_ALERT_4_C Contact Calc | 2.94000, | Rep   | 2.941(4) | ..... | Senseless s.u. |
| H(25)-H(31)                    | 1.555    | 1.555 | .....    | #     | 94 Check       |
| PLAT754_ALERT_4_C Contact Calc | 1.95000, | Rep   | 1.948(4) | ..... | Senseless s.u. |
| H(26)-O(2)                     | 1.555    | 1.555 | .....    | #     | 94 Check       |
| PLAT754_ALERT_4_C Contact Calc | 2.98000, | Rep   | 2.975(5) | ..... | Senseless s.u. |
| H(26)-N(2)                     | 1.555    | 2.745 | .....    | #     | 94 Check       |
| PLAT754_ALERT_4_C Contact Calc | 3.34000, | Rep   | 3.338(5) | ..... | Senseless s.u. |
| H(26)-C(23)                    | 1.555    | 1.555 | .....    | #     | 94 Check       |
| PLAT754_ALERT_4_C Contact Calc | 2.04000, | Rep   | 2.039(5) | ..... | Senseless s.u. |
| H(26)-C(24)                    | 1.555    | 1.555 | .....    | #     | 94 Check       |
| PLAT754_ALERT_4_C Contact Calc | 2.66000, | Rep   | 2.658(5) | ..... | Senseless s.u. |
| H(26)-C(25)                    | 1.555    | 1.555 | .....    | #     | 94 Check       |
| PLAT754_ALERT_4_C Contact Calc | 3.18000, | Rep   | 3.181(6) | ..... | Senseless s.u. |
| H(26)-C(35)                    | 1.555    | 1.555 | .....    | #     | 94 Check       |
| PLAT754_ALERT_4_C Contact Calc | 2.80000, | Rep   | 2.796(6) | ..... | Senseless s.u. |
| H(26)-C(38)                    | 1.555    | 1.555 | .....    | #     | 94 Check       |
| PLAT754_ALERT_4_C Contact Calc | 2.80000, | Rep   | 2.796(5) | ..... | Senseless s.u. |
| H(26)-C(39)                    | 1.555    | 1.555 | .....    | #     | 94 Check       |
| PLAT754_ALERT_4_C Contact Calc | 3.54000, | Rep   | 3.536(5) | ..... | Senseless s.u. |

|                                |          |       |          |       |                |
|--------------------------------|----------|-------|----------|-------|----------------|
| H(26)-C(40)                    | 1.555    | 1.555 | .....    | #     | 94 Check       |
| PLAT754_ALERT_4_C Contact Calc | 3.07000, | Rep   | 3.068(6) | ..... | Senseless s.u. |
| H(26)-C(44)                    | 1.555    | 1.555 | .....    | #     | 94 Check       |
| PLAT754_ALERT_4_C Contact Calc | 3.24000, | Rep   | 3.245(6) | ..... | Senseless s.u. |
| H(26)-H(4)                     | 1.555    | 4.564 | .....    | #     | 94 Check       |
| PLAT754_ALERT_4_C Contact Calc | 3.07000, | Rep   | 3.070(5) | ..... | Senseless s.u. |
| H(26)-H(16)                    | 1.555    | 4.554 | .....    | #     | 94 Check       |
| PLAT754_ALERT_4_C Contact Calc | 2.50000, | Rep   | 2.499(4) | ..... | Senseless s.u. |
| H(26)-H(20)                    | 1.555    | 1.555 | .....    | #     | 94 Check       |
| PLAT754_ALERT_4_C Contact Calc | 1.55000, | Rep   | 1.551(5) | ..... | Senseless s.u. |
| H(26)-H(27)                    | 1.555    | 1.555 | .....    | #     | 94 Check       |
| PLAT754_ALERT_4_C Contact Calc | 3.49000, | Rep   | 3.491(5) | ..... | Senseless s.u. |
| H(26)-H(28)                    | 1.555    | 1.555 | .....    | #     | 94 Check       |
| PLAT754_ALERT_4_C Contact Calc | 1.95000, | Rep   | 1.945(5) | ..... | Senseless s.u. |
| H(27)-O(2)                     | 1.555    | 1.555 | .....    | #     | 94 Check       |
| PLAT754_ALERT_4_C Contact Calc | 3.04000, | Rep   | 3.038(4) | ..... | Senseless s.u. |
| H(27)-N(2)                     | 1.555    | 1.555 | .....    | #     | 94 Check       |
| PLAT754_ALERT_4_C Contact Calc | 3.57000, | Rep   | 3.570(6) | ..... | Senseless s.u. |
| H(27)-C(6)                     | 1.555    | 4.564 | .....    | #     | 94 Check       |
| PLAT754_ALERT_4_C Contact Calc | 2.68000, | Rep   | 2.680(6) | ..... | Senseless s.u. |
| H(27)-C(23)                    | 1.555    | 1.555 | .....    | #     | 94 Check       |
| PLAT754_ALERT_4_C Contact Calc | 2.03000, | Rep   | 2.029(5) | ..... | Senseless s.u. |
| H(27)-C(24)                    | 1.555    | 1.555 | .....    | #     | 94 Check       |
| PLAT754_ALERT_4_C Contact Calc | 2.68000, | Rep   | 2.682(5) | ..... | Senseless s.u. |
| H(27)-C(25)                    | 1.555    | 1.555 | .....    | #     | 94 Check       |
| PLAT754_ALERT_4_C Contact Calc | 2.56000, | Rep   | 2.557(5) | ..... | Senseless s.u. |
| H(27)-C(33)                    | 1.555    | 1.555 | .....    | #     | 94 Check       |
| PLAT754_ALERT_4_C Contact Calc | 2.65000, | Rep   | 2.646(6) | ..... | Senseless s.u. |
| H(27)-C(35)                    | 1.555    | 1.555 | .....    | #     | 94 Check       |
| PLAT754_ALERT_4_C Contact Calc | 3.20000, | Rep   | 3.195(6) | ..... | Senseless s.u. |
| H(27)-C(36)                    | 1.555    | 1.555 | .....    | #     | 94 Check       |
| PLAT754_ALERT_4_C Contact Calc | 3.35000, | Rep   | 3.352(5) | ..... | Senseless s.u. |
| H(27)-C(38)                    | 1.555    | 1.555 | .....    | #     | 94 Check       |
| PLAT754_ALERT_4_C Contact Calc | 3.20000, | Rep   | 3.204(4) | ..... | Senseless s.u. |
| H(27)-H(3)                     | 1.555    | 4.564 | .....    | #     | 94 Check       |
| PLAT754_ALERT_4_C Contact Calc | 2.82000, | Rep   | 2.816(6) | ..... | Senseless s.u. |
| H(27)-H(4)                     | 1.555    | 4.564 | .....    | #     | 94 Check       |
| PLAT754_ALERT_4_C Contact Calc | 2.75000, | Rep   | 2.755(4) | ..... | Senseless s.u. |
| H(27)-H(20)                    | 1.555    | 1.555 | .....    | #     | 94 Check       |
| PLAT754_ALERT_4_C Contact Calc | 1.55000, | Rep   | 1.551(5) | ..... | Senseless s.u. |
| H(27)-H(26)                    | 1.555    | 1.555 | .....    | #     | 94 Check       |
| PLAT754_ALERT_4_C Contact Calc | 2.54000, | Rep   | 2.537(6) | ..... | Senseless s.u. |
| H(27)-H(28)                    | 1.555    | 1.555 | .....    | #     | 94 Check       |
| PLAT754_ALERT_4_C Contact Calc | 3.50000, | Rep   | 3.501(6) | ..... | Senseless s.u. |
| H(27)-H(29)                    | 1.555    | 1.555 | .....    | #     | 94 Check       |
| PLAT754_ALERT_4_C Contact Calc | 1.95000, | Rep   | 1.947(4) | ..... | Senseless s.u. |
| H(28)-O(2)                     | 1.555    | 1.555 | .....    | #     | 94 Check       |
| PLAT754_ALERT_4_C Contact Calc | 2.94000, | Rep   | 2.944(5) | ..... | Senseless s.u. |
| H(28)-N(2)                     | 1.555    | 1.555 | .....    | #     | 94 Check       |
| PLAT754_ALERT_4_C Contact Calc | 3.49000, | Rep   | 3.487(6) | ..... | Senseless s.u. |
| H(28)-C(5)                     | 1.555    | 4.564 | .....    | #     | 94 Check       |
| PLAT754_ALERT_4_C Contact Calc | 2.62000, | Rep   | 2.622(4) | ..... | Senseless s.u. |
| H(28)-C(23)                    | 1.555    | 1.555 | .....    | #     | 94 Check       |
| PLAT754_ALERT_4_C Contact Calc | 3.16000, | Rep   | 3.164(4) | ..... | Senseless s.u. |
| H(28)-C(24)                    | 1.555    | 1.555 | .....    | #     | 94 Check       |
| PLAT754_ALERT_4_C Contact Calc | 2.48000, | Rep   | 2.480(4) | ..... | Senseless s.u. |
| H(28)-C(33)                    | 1.555    | 1.555 | .....    | #     | 94 Check       |
| PLAT754_ALERT_4_C Contact Calc | 2.63000, | Rep   | 2.626(5) | ..... | Senseless s.u. |
| H(28)-C(34)                    | 1.555    | 1.555 | .....    | #     | 94 Check       |
| PLAT754_ALERT_4_C Contact Calc | 2.03000, | Rep   | 2.033(5) | ..... | Senseless s.u. |
| H(28)-C(36)                    | 1.555    | 1.555 | .....    | #     | 94 Check       |
| PLAT754_ALERT_4_C Contact Calc | 3.32000, | Rep   | 3.316(5) | ..... | Senseless s.u. |

|                                |          |       |          |       |                |
|--------------------------------|----------|-------|----------|-------|----------------|
| H(28)-C(37)                    | 1.555    | 1.555 | .....    | #     | 94 Check       |
| PLAT754_ALERT_4_C Contact Calc | 2.55000, | Rep   | 2.554(6) | ..... | Senseless s.u. |
| H(28)-H(3)                     | 1.555    | 4.564 | .....    | #     | 94 Check       |
| PLAT754_ALERT_4_C Contact Calc | 3.49000, | Rep   | 3.491(5) | ..... | Senseless s.u. |
| H(28)-H(26)                    | 1.555    | 1.555 | .....    | #     | 94 Check       |
| PLAT754_ALERT_4_C Contact Calc | 2.54000, | Rep   | 2.537(6) | ..... | Senseless s.u. |
| H(28)-H(27)                    | 1.555    | 1.555 | .....    | #     | 94 Check       |
| PLAT754_ALERT_4_C Contact Calc | 1.55000, | Rep   | 1.551(6) | ..... | Senseless s.u. |
| H(28)-H(29)                    | 1.555    | 1.555 | .....    | #     | 94 Check       |
| PLAT754_ALERT_4_C Contact Calc | 2.39000, | Rep   | 2.389(6) | ..... | Senseless s.u. |
| H(28)-H(30)                    | 1.555    | 1.555 | .....    | #     | 94 Check       |
| PLAT754_ALERT_4_C Contact Calc | 3.46000, | Rep   | 3.456(5) | ..... | Senseless s.u. |
| H(28)-H(32)                    | 1.555    | 1.555 | .....    | #     | 94 Check       |
| PLAT754_ALERT_4_C Contact Calc | 1.96000, | Rep   | 1.954(5) | ..... | Senseless s.u. |
| H(29)-O(2)                     | 1.555    | 1.555 | .....    | #     | 94 Check       |
| PLAT754_ALERT_4_C Contact Calc | 2.73000, | Rep   | 2.734(4) | ..... | Senseless s.u. |
| H(29)-N(1)                     | 1.555    | 2.655 | .....    | #     | 94 Check       |
| PLAT754_ALERT_4_C Contact Calc | 3.22000, | Rep   | 3.221(4) | ..... | Senseless s.u. |
| H(29)-C(11)                    | 1.555    | 2.655 | .....    | #     | 94 Check       |
| PLAT754_ALERT_4_C Contact Calc | 3.44000, | Rep   | 3.442(4) | ..... | Senseless s.u. |
| H(29)-C(12)                    | 1.555    | 2.655 | .....    | #     | 94 Check       |
| PLAT754_ALERT_4_C Contact Calc | 3.32000, | Rep   | 3.324(4) | ..... | Senseless s.u. |
| H(29)-C(23)                    | 1.555    | 1.555 | .....    | #     | 94 Check       |
| PLAT754_ALERT_4_C Contact Calc | 3.19000, | Rep   | 3.185(6) | ..... | Senseless s.u. |
| H(29)-C(34)                    | 1.555    | 1.555 | .....    | #     | 94 Check       |
| PLAT754_ALERT_4_C Contact Calc | 2.04000, | Rep   | 2.045(4) | ..... | Senseless s.u. |
| H(29)-C(36)                    | 1.555    | 1.555 | .....    | #     | 94 Check       |
| PLAT754_ALERT_4_C Contact Calc | 2.80000, | Rep   | 2.796(5) | ..... | Senseless s.u. |
| H(29)-C(37)                    | 1.555    | 1.555 | .....    | #     | 94 Check       |
| PLAT754_ALERT_4_C Contact Calc | 3.03000, | Rep   | 3.026(7) | ..... | Senseless s.u. |
| H(29)-H(3)                     | 1.555    | 4.564 | .....    | #     | 94 Check       |
| PLAT754_ALERT_4_C Contact Calc | 2.59000, | Rep   | 2.585(4) | ..... | Senseless s.u. |
| H(29)-H(7)                     | 1.555    | 2.655 | .....    | #     | 94 Check       |
| PLAT754_ALERT_4_C Contact Calc | 3.03000, | Rep   | 3.027(6) | ..... | Senseless s.u. |
| H(29)-H(10)                    | 1.555    | 2.655 | .....    | #     | 94 Check       |
| PLAT754_ALERT_4_C Contact Calc | 3.50000, | Rep   | 3.501(6) | ..... | Senseless s.u. |
| H(29)-H(27)                    | 1.555    | 1.555 | .....    | #     | 94 Check       |
| PLAT754_ALERT_4_C Contact Calc | 1.55000, | Rep   | 1.551(6) | ..... | Senseless s.u. |
| H(29)-H(28)                    | 1.555    | 1.555 | .....    | #     | 94 Check       |
| PLAT754_ALERT_4_C Contact Calc | 2.32000, | Rep   | 2.321(5) | ..... | Senseless s.u. |
| H(29)-H(30)                    | 1.555    | 1.555 | .....    | #     | 94 Check       |
| PLAT754_ALERT_4_C Contact Calc | 3.49000, | Rep   | 3.487(5) | ..... | Senseless s.u. |
| H(29)-H(31)                    | 1.555    | 1.555 | .....    | #     | 94 Check       |
| PLAT754_ALERT_4_C Contact Calc | 2.54000, | Rep   | 2.543(5) | ..... | Senseless s.u. |
| H(29)-H(32)                    | 1.555    | 1.555 | .....    | #     | 94 Check       |
| PLAT754_ALERT_4_C Contact Calc | 3.25000, | Rep   | 3.249(5) | ..... | Senseless s.u. |
| H(30)-O(2)                     | 1.555    | 1.555 | .....    | #     | 94 Check       |
| PLAT754_ALERT_4_C Contact Calc | 3.39000, | Rep   | 3.390(4) | ..... | Senseless s.u. |
| H(30)-C(15)                    | 1.555    | 1.565 | .....    | #     | 94 Check       |
| PLAT754_ALERT_4_C Contact Calc | 3.56000, | Rep   | 3.559(6) | ..... | Senseless s.u. |
| H(30)-C(17)                    | 1.555    | 1.565 | .....    | #     | 94 Check       |
| PLAT754_ALERT_4_C Contact Calc | 3.55000, | Rep   | 3.552(6) | ..... | Senseless s.u. |
| H(30)-C(21)                    | 1.555    | 1.565 | .....    | #     | 94 Check       |
| PLAT754_ALERT_4_C Contact Calc | 3.08000, | Rep   | 3.084(6) | ..... | Senseless s.u. |
| H(30)-C(22)                    | 1.555    | 1.565 | .....    | #     | 94 Check       |
| PLAT754_ALERT_4_C Contact Calc | 2.09000, | Rep   | 2.088(4) | ..... | Senseless s.u. |
| H(30)-C(23)                    | 1.555    | 1.555 | .....    | #     | 94 Check       |
| PLAT754_ALERT_4_C Contact Calc | 3.22000, | Rep   | 3.221(5) | ..... | Senseless s.u. |
| H(30)-C(24)                    | 1.555    | 1.555 | .....    | #     | 94 Check       |
| PLAT754_ALERT_4_C Contact Calc | 2.78000, | Rep   | 2.776(4) | ..... | Senseless s.u. |
| H(30)-C(30)                    | 1.555    | 1.555 | .....    | #     | 94 Check       |
| PLAT754_ALERT_4_C Contact Calc | 2.77000, | Rep   | 2.774(4) | ..... | Senseless s.u. |

|                                |          |       |          |       |                |
|--------------------------------|----------|-------|----------|-------|----------------|
| H(30)-C(31)                    | 1.555    | 1.555 | .....    | #     | 94 Check       |
| PLAT754_ALERT_4_C Contact Calc | 2.84000, | Rep   | 2.838(5) | ..... | Senseless s.u. |
| H(30)-C(33)                    | 1.555    | 1.555 | .....    | #     | 94 Check       |
| PLAT754_ALERT_4_C Contact Calc | 2.06000, | Rep   | 2.061(6) | ..... | Senseless s.u. |
| H(30)-C(35)                    | 1.555    | 1.555 | .....    | #     | 94 Check       |
| PLAT754_ALERT_4_C Contact Calc | 2.09000, | Rep   | 2.085(4) | ..... | Senseless s.u. |
| H(30)-C(37)                    | 1.555    | 1.555 | .....    | #     | 94 Check       |
| PLAT754_ALERT_4_C Contact Calc | 3.24000, | Rep   | 3.244(4) | ..... | Senseless s.u. |
| H(30)-C(38)                    | 1.555    | 1.555 | .....    | #     | 94 Check       |
| PLAT754_ALERT_4_C Contact Calc | 2.63000, | Rep   | 2.631(4) | ..... | Senseless s.u. |
| H(30)-H(12)                    | 1.555    | 1.565 | .....    | #     | 94 Check       |
| PLAT754_ALERT_4_C Contact Calc | 3.44000, | Rep   | 3.444(4) | ..... | Senseless s.u. |
| H(30)-H(13)                    | 1.555    | 1.565 | .....    | #     | 94 Check       |
| PLAT754_ALERT_4_C Contact Calc | 2.96000, | Rep   | 2.958(5) | ..... | Senseless s.u. |
| H(30)-H(19)                    | 1.555    | 1.565 | .....    | #     | 94 Check       |
| PLAT754_ALERT_4_C Contact Calc | 2.21000, | Rep   | 2.206(5) | ..... | Senseless s.u. |
| H(30)-H(25)                    | 1.555    | 1.555 | .....    | #     | 94 Check       |
| PLAT754_ALERT_4_C Contact Calc | 2.39000, | Rep   | 2.389(6) | ..... | Senseless s.u. |
| H(30)-H(28)                    | 1.555    | 1.555 | .....    | #     | 94 Check       |
| PLAT754_ALERT_4_C Contact Calc | 2.32000, | Rep   | 2.321(5) | ..... | Senseless s.u. |
| H(30)-H(29)                    | 1.555    | 1.555 | .....    | #     | 94 Check       |
| PLAT754_ALERT_4_C Contact Calc | 2.26000, | Rep   | 2.265(4) | ..... | Senseless s.u. |
| H(30)-H(31)                    | 1.555    | 1.555 | .....    | #     | 94 Check       |
| PLAT754_ALERT_4_C Contact Calc | 2.57000, | Rep   | 2.575(4) | ..... | Senseless s.u. |
| H(30)-H(32)                    | 1.555    | 1.555 | .....    | #     | 94 Check       |
| PLAT754_ALERT_4_C Contact Calc | 3.21000, | Rep   | 3.213(5) | ..... | Senseless s.u. |
| H(31)-C(7)                     | 1.555    | 1.555 | .....    | #     | 94 Check       |
| PLAT754_ALERT_4_C Contact Calc | 3.01000, | Rep   | 3.007(4) | ..... | Senseless s.u. |
| H(31)-C(8)                     | 1.555    | 1.555 | .....    | #     | 94 Check       |
| PLAT754_ALERT_4_C Contact Calc | 3.45000, | Rep   | 3.449(7) | ..... | Senseless s.u. |
| H(31)-C(20)                    | 1.555    | 1.565 | .....    | #     | 94 Check       |
| PLAT754_ALERT_4_C Contact Calc | 2.99000, | Rep   | 2.985(6) | ..... | Senseless s.u. |
| H(31)-C(21)                    | 1.555    | 1.565 | .....    | #     | 94 Check       |
| PLAT754_ALERT_4_C Contact Calc | 3.48000, | Rep   | 3.476(5) | ..... | Senseless s.u. |
| H(31)-C(22)                    | 1.555    | 1.565 | .....    | #     | 94 Check       |
| PLAT754_ALERT_4_C Contact Calc | 2.83000, | Rep   | 2.827(5) | ..... | Senseless s.u. |
| H(31)-C(23)                    | 1.555    | 1.555 | .....    | #     | 94 Check       |
| PLAT754_ALERT_4_C Contact Calc | 3.13000, | Rep   | 3.129(5) | ..... | Senseless s.u. |
| H(31)-C(24)                    | 1.555    | 1.555 | .....    | #     | 94 Check       |
| PLAT754_ALERT_4_C Contact Calc | 3.10000, | Rep   | 3.100(4) | ..... | Senseless s.u. |
| H(31)-C(30)                    | 1.555    | 1.555 | .....    | #     | 94 Check       |
| PLAT754_ALERT_4_C Contact Calc | 2.99000, | Rep   | 2.992(4) | ..... | Senseless s.u. |
| H(31)-C(31)                    | 1.555    | 1.555 | .....    | #     | 94 Check       |
| PLAT754_ALERT_4_C Contact Calc | 3.29000, | Rep   | 3.291(6) | ..... | Senseless s.u. |
| H(31)-C(35)                    | 1.555    | 1.555 | .....    | #     | 94 Check       |
| PLAT754_ALERT_4_C Contact Calc | 2.07000, | Rep   | 2.073(5) | ..... | Senseless s.u. |
| H(31)-C(36)                    | 1.555    | 1.555 | .....    | #     | 94 Check       |
| PLAT754_ALERT_4_C Contact Calc | 2.08000, | Rep   | 2.079(5) | ..... | Senseless s.u. |
| H(31)-C(38)                    | 1.555    | 1.555 | .....    | #     | 94 Check       |
| PLAT754_ALERT_4_C Contact Calc | 3.15000, | Rep   | 3.150(5) | ..... | Senseless s.u. |
| H(31)-C(39)                    | 1.555    | 1.555 | .....    | #     | 94 Check       |
| PLAT754_ALERT_4_C Contact Calc | 3.06000, | Rep   | 3.058(4) | ..... | Senseless s.u. |
| H(31)-H(5)                     | 1.555    | 1.555 | .....    | #     | 94 Check       |
| PLAT754_ALERT_4_C Contact Calc | 2.66000, | Rep   | 2.657(4) | ..... | Senseless s.u. |
| H(31)-H(6)                     | 1.555    | 1.555 | .....    | #     | 94 Check       |
| PLAT754_ALERT_4_C Contact Calc | 2.85000, | Rep   | 2.845(6) | ..... | Senseless s.u. |
| H(31)-H(18)                    | 1.555    | 1.565 | .....    | #     | 94 Check       |
| PLAT754_ALERT_4_C Contact Calc | 2.94000, | Rep   | 2.941(4) | ..... | Senseless s.u. |
| H(31)-H(25)                    | 1.555    | 1.555 | .....    | #     | 94 Check       |
| PLAT754_ALERT_4_C Contact Calc | 3.49000, | Rep   | 3.487(5) | ..... | Senseless s.u. |
| H(31)-H(29)                    | 1.555    | 1.555 | .....    | #     | 94 Check       |
| PLAT754_ALERT_4_C Contact Calc | 2.26000, | Rep   | 2.265(4) | ..... | Senseless s.u. |



|                                |          |       |          |       |                |
|--------------------------------|----------|-------|----------|-------|----------------|
| H(31)-H(30)                    | 1.555    | 1.555 | .....    | #     | 94 Check       |
| PLAT754_ALERT_4_C Contact Calc | 1.55000, | Rep   | 1.551(5) | ..... | Senseless s.u. |
| H(31)-H(32)                    | 1.555    | 1.555 | .....    | #     | 94 Check       |
| PLAT754_ALERT_4_C Contact Calc | 2.85000, | Rep   | 2.852(3) | ..... | Senseless s.u. |
| H(32)-O(1)                     | 1.555    | 2.655 | .....    | #     | 94 Check       |
| PLAT754_ALERT_4_C Contact Calc | 2.69000, | Rep   | 2.689(5) | ..... | Senseless s.u. |
| H(32)-O(2)                     | 1.555    | 1.555 | .....    | #     | 94 Check       |
| PLAT754_ALERT_4_C Contact Calc | 3.41000, | Rep   | 3.415(4) | ..... | Senseless s.u. |
| H(32)-C(12)                    | 1.555    | 2.655 | .....    | #     | 94 Check       |
| PLAT754_ALERT_4_C Contact Calc | 3.38000, | Rep   | 3.376(4) | ..... | Senseless s.u. |
| H(32)-C(13)                    | 1.555    | 2.655 | .....    | #     | 94 Check       |
| PLAT754_ALERT_4_C Contact Calc | 3.18000, | Rep   | 3.183(4) | ..... | Senseless s.u. |
| H(32)-C(23)                    | 1.555    | 1.555 | .....    | #     | 94 Check       |
| PLAT754_ALERT_4_C Contact Calc | 3.06000, | Rep   | 3.058(5) | ..... | Senseless s.u. |
| H(32)-C(24)                    | 1.555    | 1.555 | .....    | #     | 94 Check       |
| PLAT754_ALERT_4_C Contact Calc | 3.35000, | Rep   | 3.348(6) | ..... | Senseless s.u. |
| H(32)-C(34)                    | 1.555    | 1.555 | .....    | #     | 94 Check       |
| PLAT754_ALERT_4_C Contact Calc | 2.53000, | Rep   | 2.534(5) | ..... | Senseless s.u. |
| H(32)-C(35)                    | 1.555    | 1.555 | .....    | #     | 94 Check       |
| PLAT754_ALERT_4_C Contact Calc | 2.07000, | Rep   | 2.069(4) | ..... | Senseless s.u. |
| H(32)-C(36)                    | 1.555    | 1.555 | .....    | #     | 94 Check       |
| PLAT754_ALERT_4_C Contact Calc | 2.08000, | Rep   | 2.078(4) | ..... | Senseless s.u. |
| H(32)-C(38)                    | 1.555    | 1.555 | .....    | #     | 94 Check       |
| PLAT754_ALERT_4_C Contact Calc | 2.65000, | Rep   | 2.653(4) | ..... | Senseless s.u. |
| H(32)-C(39)                    | 1.555    | 1.555 | .....    | #     | 94 Check       |
| PLAT754_ALERT_4_C Contact Calc | 2.65000, | Rep   | 2.652(5) | ..... | Senseless s.u. |
| H(32)-C(44)                    | 1.555    | 1.555 | .....    | #     | 94 Check       |
| PLAT754_ALERT_4_C Contact Calc | 3.34000, | Rep   | 3.343(4) | ..... | Senseless s.u. |
| H(32)-H(6)                     | 1.555    | 1.555 | .....    | #     | 94 Check       |
| PLAT754_ALERT_4_C Contact Calc | 3.07000, | Rep   | 3.073(5) | ..... | Senseless s.u. |
| H(32)-H(7)                     | 1.555    | 2.655 | .....    | #     | 94 Check       |
| PLAT754_ALERT_4_C Contact Calc | 3.60000, | Rep   | 3.598(5) | ..... | Senseless s.u. |
| H(32)-H(9)                     | 1.555    | 2.655 | .....    | #     | 94 Check       |
| PLAT754_ALERT_4_C Contact Calc | 3.04000, | Rep   | 3.037(4) | ..... | Senseless s.u. |
| H(32)-H(10)                    | 1.555    | 2.655 | .....    | #     | 94 Check       |
| PLAT754_ALERT_4_C Contact Calc | 3.35000, | Rep   | 3.348(7) | ..... | Senseless s.u. |
| H(32)-H(18)                    | 1.555    | 1.565 | .....    | #     | 94 Check       |
| PLAT754_ALERT_4_C Contact Calc | 3.46000, | Rep   | 3.456(5) | ..... | Senseless s.u. |
| H(32)-H(28)                    | 1.555    | 1.555 | .....    | #     | 94 Check       |
| PLAT754_ALERT_4_C Contact Calc | 2.54000, | Rep   | 2.543(5) | ..... | Senseless s.u. |
| H(32)-H(29)                    | 1.555    | 1.555 | .....    | #     | 94 Check       |
| PLAT754_ALERT_4_C Contact Calc | 2.57000, | Rep   | 2.575(4) | ..... | Senseless s.u. |
| H(32)-H(30)                    | 1.555    | 1.555 | .....    | #     | 94 Check       |
| PLAT754_ALERT_4_C Contact Calc | 1.55000, | Rep   | 1.551(5) | ..... | Senseless s.u. |
| H(32)-H(31)                    | 1.555    | 1.555 | .....    | #     | 94 Check       |

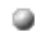

### Alert level G

CHEMS02\_ALERT\_1\_G Please check that you have entered the correct  
 \_publ\_requested\_category classification of your compound;  
 FI or CI or EI for inorganic; FM or CM or EM for metal-organic;  
 FO or CO or EO for organic.  
 From the CIF: \_publ\_requested\_category CHOOSE FI FM FO CI CM CO or  
 From the CIF: \_chemical\_formula\_sum:C22 H19 N1 O1

PLAT005\_ALERT\_5\_G No Embedded Refinement Details found in the CIF Please Do !

PLAT063\_ALERT\_4\_G Crystal Size Likely too Large for Beam Size .... 1.20 mm

PLAT128\_ALERT\_4\_G Alternate Setting for Input Space Group P21/c P21/n Note

PLAT200\_ALERT\_1\_G Reported \_diffrn\_ambient\_temperature .... (K) 293 Check

PLAT710\_ALERT\_4\_G Delete 1-2-3 or 2-3-4 Linear Torsion Angle ... # 10 Do !  
 C(2)-C(1)-C(11)-N(1) 156.00 12.00 1.555 1.555 1.555 1.555

PLAT710\_ALERT\_4\_G Delete 1-2-3 or 2-3-4 Linear Torsion Angle ... # 19 Do !

|                                                                       |         |       |       |               |       |       |              |
|-----------------------------------------------------------------------|---------|-------|-------|---------------|-------|-------|--------------|
| C(9)-C(1)-C(11-N(1))                                                  | 35.00   | 12.00 | 1.555 | 1.555         | 1.555 | 1.555 |              |
| PLAT710_ALERT_4_G Delete 1-2-3 or 2-3-4 Linear Torsion Angle ... #    |         |       |       |               |       |       | 28 Do !      |
| C(14-C(1)-C(11-N(1))                                                  | -94.00  | 12.00 | 1.555 | 1.555         | 1.555 | 1.555 |              |
| PLAT710_ALERT_4_G Delete 1-2-3 or 2-3-4 Linear Torsion Angle ... #    |         |       |       |               |       |       | 78 Do !      |
| C(24-C(23-C(33-N(2))                                                  | -157.00 | 10.00 | 1.555 | 1.555         | 1.555 | 1.555 |              |
| PLAT710_ALERT_4_G Delete 1-2-3 or 2-3-4 Linear Torsion Angle ... #    |         |       |       |               |       |       | 87 Do !      |
| C(31-C(23-C(33-N(2))                                                  | -37.00  | 10.00 | 1.555 | 1.555         | 1.555 | 1.555 |              |
| PLAT710_ALERT_4_G Delete 1-2-3 or 2-3-4 Linear Torsion Angle ... #    |         |       |       |               |       |       | 96 Do !      |
| C(36-C(23-C(33-N(2))                                                  | 92.00   | 10.00 | 1.555 | 1.555         | 1.555 | 1.555 |              |
| PLAT793_ALERT_4_G The Model has Chirality at C1                       |         |       |       | (Centro SPGR) |       |       | S Verify     |
| PLAT793_ALERT_4_G The Model has Chirality at C2                       |         |       |       | (Centro SPGR) |       |       | R Verify     |
| PLAT793_ALERT_4_G The Model has Chirality at C14                      |         |       |       | (Centro SPGR) |       |       | R Verify     |
| PLAT793_ALERT_4_G The Model has Chirality at C16                      |         |       |       | (Centro SPGR) |       |       | R Verify     |
| PLAT793_ALERT_4_G The Model has Chirality at C23                      |         |       |       | (Centro SPGR) |       |       | R Verify     |
| PLAT793_ALERT_4_G The Model has Chirality at C24                      |         |       |       | (Centro SPGR) |       |       | S Verify     |
| PLAT793_ALERT_4_G The Model has Chirality at C36                      |         |       |       | (Centro SPGR) |       |       | S Verify     |
| PLAT793_ALERT_4_G The Model has Chirality at C38                      |         |       |       | (Centro SPGR) |       |       | S Verify     |
| PLAT882_ALERT_1_G Missing datum for _diffn_reflms_av_unetI/netI ..... |         |       |       |               |       |       | Please Check |

---

0 **ALERT level A** = Most likely a serious problem - resolve or explain  
 2 **ALERT level B** = A potentially serious problem, consider carefully  
 979 **ALERT level C** = Check. Ensure it is not caused by an omission or oversight  
 20 **ALERT level G** = General information/check it is not something unexpected

4 ALERT type 1 CIF construction/syntax error, inconsistent or missing data  
 0 ALERT type 2 Indicator that the structure model may be wrong or deficient  
 5 ALERT type 3 Indicator that the structure quality may be low  
 991 ALERT type 4 Improvement, methodology, query or suggestion  
 1 ALERT type 5 Informative message, check

---

It is advisable to attempt to resolve as many as possible of the alerts in all categories. Often the minor alerts point to easily fixed oversights, errors and omissions in your CIF or refinement strategy, so attention to these fine details can be worthwhile. In order to resolve some of the more serious problems it may be necessary to carry out additional measurements or structure refinements. However, the purpose of your study may justify the reported deviations and the more serious of these should normally be commented upon in the discussion or experimental section of a paper or in the "special\_details" fields of the CIF. checkCIF was carefully designed to identify outliers and unusual parameters, but every test has its limitations and alerts that are not important in a particular case may appear. Conversely, the absence of alerts does not guarantee there are no aspects of the results needing attention. It is up to the individual to critically assess their own results and, if necessary, seek expert advice.

### **Publication of your CIF in IUCr journals**

A basic structural check has been run on your CIF. These basic checks will be run on all CIFs submitted for publication in IUCr journals (*Acta Crystallographica*, *Journal of Applied Crystallography*, *Journal of Synchrotron Radiation*); however, if you intend to submit to *Acta Crystallographica Section C* or *E* or *IUCrData*, you should make sure that full publication checks are run on the final version of your CIF prior to submission.

### **Publication of your CIF in other journals**

Please refer to the *Notes for Authors* of the relevant journal for any special instructions relating to CIF submission.

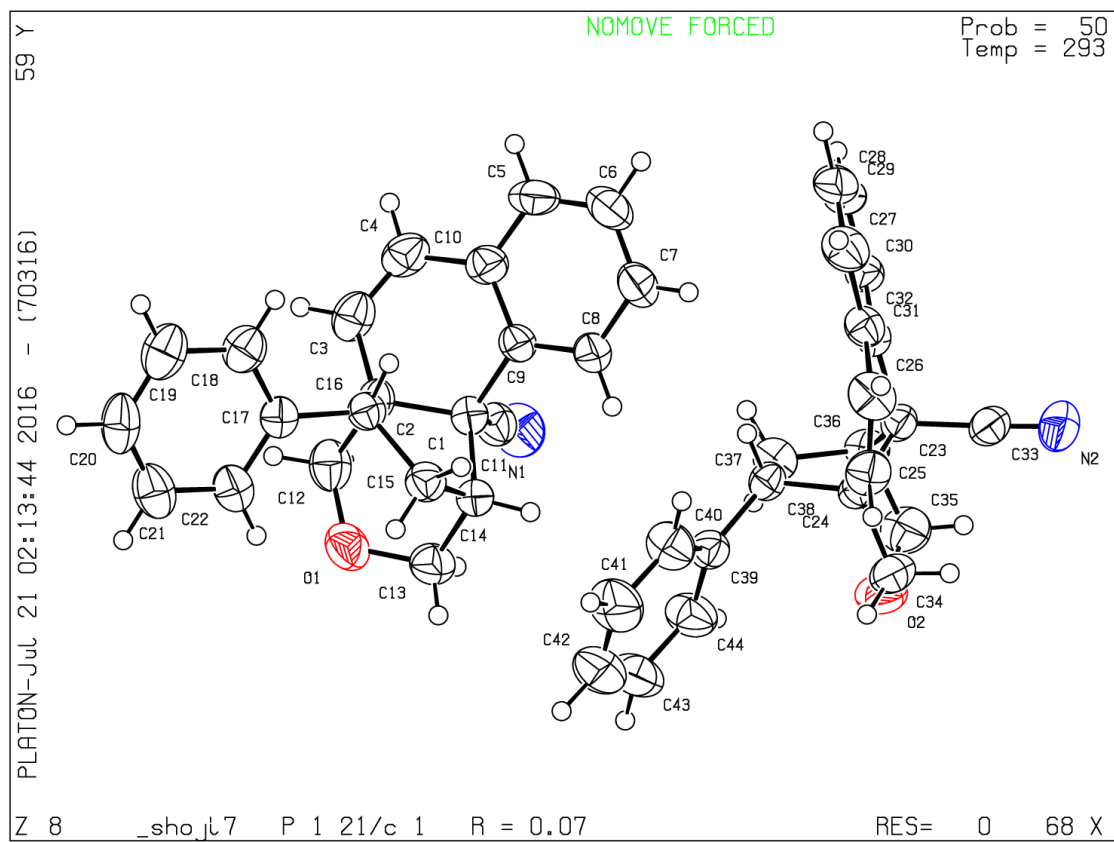

Supplement: Supplementary file 9 [file 5906367]
